# Supplementary material
Source: PubMed Central journal article supplement (PMC5198263)
Supplement: ASN.2015060672SupplementaryData.pdf [file ASN.2015060672SupplementaryData.pdf]

## SUPPLEMENTARY FIGURE LEGENDS

**Supplementary Figure 1: Podocyte specific knockdown of *Klf15* in *Podocin-Cre Klf15<sup>flox/flox</sup>* mice was confirmed.** (A) Primary glomerular epithelial cells (PGECs) were isolated from 12-week old *Podocin-Cre Klf15<sup>flox/flox</sup>* and *Podocin-Cre Klf15<sup>+/+</sup>* mice and cultured at 37°C for 1 week. Real-time PCR was performed for *Nephrin*, *Podocin*, *Synaptopodin*, and *Wt1* mRNA expression (n=6, \*\*\*p<0.001, Mann-Whitney test). (B) Real-time PCR was performed for *Klf15* mRNA expression (n=6, \*p<0.05, Mann-Whitney test). (C) Protein was also extracted and western blot analysis for *Klf15* was performed. The representative blot of three independent experiments is shown in the top panel. The bottom panel shows the quantification of *Klf15* by densitometry (n=3, \*p<0.05, Mann-Whitney test). (D) Immunofluorescence staining for *Klf15* and *Wt1* was performed in 12-week old *Podocin-Cre Klf15<sup>flox/flox</sup>* and *Podocin-Cre Klf15<sup>+/+</sup>* mice. Representative images from four mice in each group are shown in the left panel (X 20). Arrows show colocalization of *Klf15* and *Wt1*. Arrowheads show a lack of colocalization. Asterisk demonstrates nonspecific *Wt1* staining. “R” represents autofluorescence from RBCs. In the right panel, a total of 30 glomeruli were selected in each mouse and quantification of *Klf15* staining in the podocytes was determined by the ratio of *Klf15*<sup>+</sup> and *Wt1*<sup>+</sup> cells to *Wt1*<sup>+</sup> cells (n=6 mice, \*\*p<0.01, unpaired *t* test).

**Supplementary Figure 2: LPS treated *Podocin-Cre Klf15<sup>flox/flox</sup>* mice exhibit a lack of recovery in proteinaceous casts and tubular dilatation after DEX administration.** *Podocin-Cre Klf15<sup>flox/flox</sup>* and *Podocin-Cre Klf15<sup>+/+</sup>* mice were concurrently treated with either DEX or vehicle after LPS treatment. All mice were sacrificed and renal cortex fixed for histology. (A-B) Periodic acid-Schiff (PAS) and hematoxylin and eosin (H&E) were performed to evaluate for glomerular or tubulointerstitial changes (X10, X 40). The representative images from 6 mice in each group are shown. Arrows show tubular dilatation and proteinaceous casts. No glomerulosclerosis or inflammatory exudate was observed.

**Supplementary Figure 3: The pattern of inflammatory markers is similar between *Podocin-Cre Klf15<sup>+/+</sup>* and *Podocin-Cre Klf15<sup>flox/flox</sup>* mice after concurrent LPS and DEX treatment.** *Podocin-Cre Klf15<sup>flox/flox</sup>* and *Podocin-Cre Klf15<sup>+/+</sup>* mice were concurrently treated with either DEX or vehicle after LPS treatment. All mice were sacrificed, glomeruli isolated, and RNA extracted for real-time PCR. (A) *Tnfa* (n=6, \*\*p<0.01, Kruskal-Wallis test with Dunn’s post-test), (B) *Il-6* (n=6, \*p<0.05, \*\*p<0.01, Kruskal-Wallis test with Dunn’s post-test), (C) *Il-1β* (n=6, \*p<0.05, Kruskal-Wallis test with Dunn’s post-test), and (D) *Infγ* mRNA expression levels are shown relative to untreated mice (n=6, \*p<0.05 versus DEX only treatment, Kruskal-Wallis test with Dunn’s post-test). (E-F) Renal cortex from all mice was fixed for histology and immunostaining was performed for F4/80 and Gr-1. Quantification was performed by counting the number of cells with +F4/80 or +Gr-1 per high power field (HPF, X20). A total of 30 HPF were selected in each mouse for quantification (n=6 mice, \*p<0.05, Kruskal-Wallis test with Dunn’s post-test).

**Supplementary Figure 4: shRNA-mediated *KLF15* knockdown reduced survival and actin stress fiber formation in differentiated human podocytes.** *KLF15* knockdown in human podocytes was performed using lentiviral shRNAmir system with the following constructs, *KLF15-shRNA33* and *KLF15-shRNA32*. *EV-shRNA* serves as the empty vector control. (A) Western blot was performed to confirm *KLF15* knockdown with quantification by densitometry (n=3, \*p<0.05, Kruskal-Wallis test with Dunn’s post-test). (B) Human podocytes were transferred from 33°C to 37°C to induce cell differentiation. Cell survival was determined by counting the number of cells at 4, 7, 10, 14 days in 37°C (n=3, \*\*p<0.01, \*\*\*p<0.001, Kruskal-Wallis test with Dunn’s post-test). (C) Phalloidin and hoechst staining was performed in surviving *EV-shRNA* and *KLF15-shRNA32* cells at 14 days post differentiation in 37°C. The representative images from 3 independent experiments are shown. A total of 100 cells were selected in each group and the cells were classified into the percentage of cells in type A, type B, or type C (n=3, \*p<0.05, \*\*p<0.01, unpaired *t* test). (D) Immunofluorescence staining for *Wt1* was performed in 12-week old *Podocin-Cre Klf15<sup>flox/flox</sup>* and *Podocin-Cre Klf15<sup>+/+</sup>* mice. A total of 30 glomeruli were selected in each mouse for quantification of podocyte number (n=6 mice, \*p<0.05, unpaired *t* test).

**Supplementary Figure 5: Overexpression of KLF15 increases actin stress fiber formation.** We initially overexpressed KLF15 in human podocytes using lentiORF-*KLF15* clone under permissive conditions (33°C). **(A)** Western blot was performed to confirm the increased expression of KLF15 after transfection in human podocytes. Subsequently, lentiORF-*KLF15* and LentiORF-*RFP* human podocytes were grown to 80% confluency in permissive conditions. **(B)** Phalloidin and hoechst staining was performed to assess for changes in actin stress fiber formation. In addition to Figure 5B-C, supplementary representative images from 3 independent experiments are shown.

**Supplementary Figure 6: Reduced KLF15 expression in GC-nonresponsive primary glomerulopathies.** Immunofluorescence for Hoechst and KLF15 was performed in renal biopsy specimens from 16 healthy donor nephrectomies, 15 GC-responsive, and 20 GC-nonresponsive patients. In addition to the representative images and quantification provided in Figure 6 and 7, supplementary representative images of KLF15 staining in the glomeruli are provided. Each set of images with Hoechst and KLF15 staining are from distinct human biopsies.

**Supplementary Figure 7: Reduced Synaptopodin and Nephtrin expression in GC-nonresponsive primary glomerulopathies.** Immunofluorescence for Nephtrin and Synaptopodin was performed in renal biopsy specimens from 16 healthy donor nephrectomies, 15 GC-responsive, and 20 GC-nonresponsive patients. ImageJ was used to quantify the intensity of **(A)** Synaptopodin and **(B)** Nephtrin expression in the glomerulus in all three groups. The glomerular region was selected, and optical density (OD) was measured and quantified as a relative fold change to healthy subjects in the lower panel (\* $p < 0.05$ , \*\* $p < 0.01$ , Kruskal-Wallis test with Dunn's post-test).

**Supplementary Figure 8: KLF4 expression is unchanged with dexamethasone treatment.** Cultured human podocytes were initially differentiated for 14 days and subsequently treated with either dexamethasone (DEX) or vehicle (VEH) for 12 hours. RNA was extracted and real-time PCR was performed. **(A)** *KLF4* and *KLF15* mRNA expression was compared between cultured human podocytes treated with and without DEX. ( $n=6$ , \*\* $p < 0.01$ , Mann-Whitney test). **(B)** Immunofluorescence staining for Klf4 was performed in wildtype mice treated with DEX, LPS, LPS/DEX. The representative images of three independent experiments are shown in the left panel (X 20). In the right panel, the intensity of KLF4 expression was quantified ( $n=3$ , \* $p < 0.05$ , Kruskal-Wallis test with Dunn's post-test). **(C)** Immunofluorescence for Hoechst and KLF4 was performed in renal biopsy specimens from 16 healthy donor nephrectomies, 15 GC-responsive, and 20 GC-nonresponsive patients. Representative images of KLF4 staining in the glomeruli are provided (left panel) in all three groups. In the right panel, the intensity of KLF4 expression was quantified and presented as fold change relative to the healthy donor nephrectomies (\*\* $p < 0.01$ , Kruskal-Wallis test with Dunn's post-test).

**Supplementary Table 1: Primer Sequences for Real-Time PCR**

| <b>Gene</b>          | <b>Forward primer</b>     | <b>Reverse primer</b>    |
|----------------------|---------------------------|--------------------------|
| Human <i>KLF15</i>   | GTTGGGTATCTGGGTGATAGGC    | TGAGAGTCGGGACTGGAACAG    |
| Mouse <i>Nephrin</i> | TGGTCAACTGTGTGTCTGGG      | TTATCTGAGCTCCGGGGTGT     |
| Mouse <i>Podocin</i> | CCAAATCCTCCGGCTTAGGG      | GAAGCAGATGTCCCAGTCGG     |
| Mouse <i>Klf15</i>   | AGAGCAGCCACCTCAAGGCCCA    | TCACACCCGAGTGAGATCGCCGGT |
| Mouse <i>Il-6</i>    | GACAAAGCCAGAGTCCTTCAGAGAG | CTAGGTTTGCCGAGTAGATCTC   |
| Mouse <i>Il1-β</i>   | CAGGATGAGGACATGAGCACC     | CTCTGCAGACTCAAACCTCCAC   |
| Mouse <i>Tnfa</i>    | ATGAGCACAGAAAGCATGATC     | TACAGGCTTGTCACTCGAATT    |
| Mouse <i>Infy</i>    | TCAAGTGGCATAGATGTGGAAGAA  | TGGCTCTGCAGGATTTTCATG    |

# Supplementary Figure 1

## A

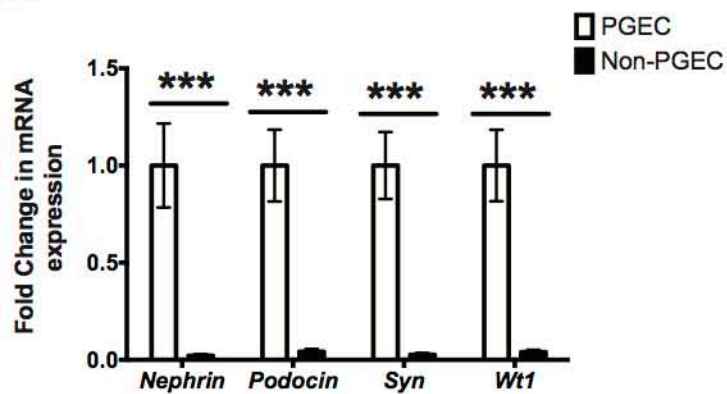

## B

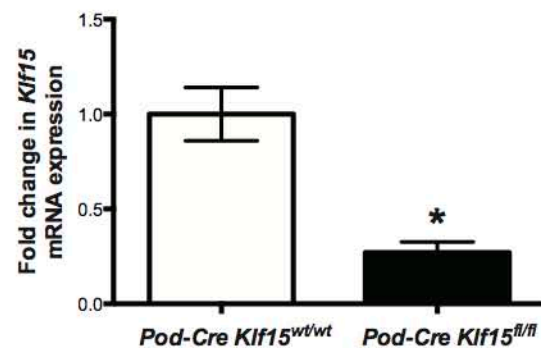

## C

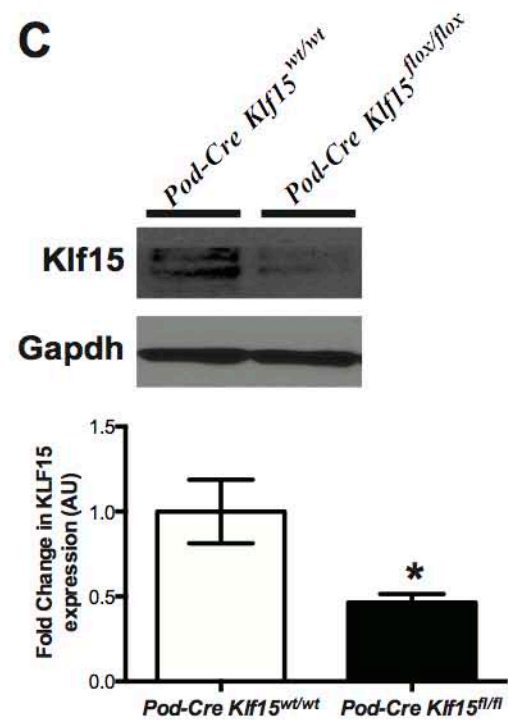

## D

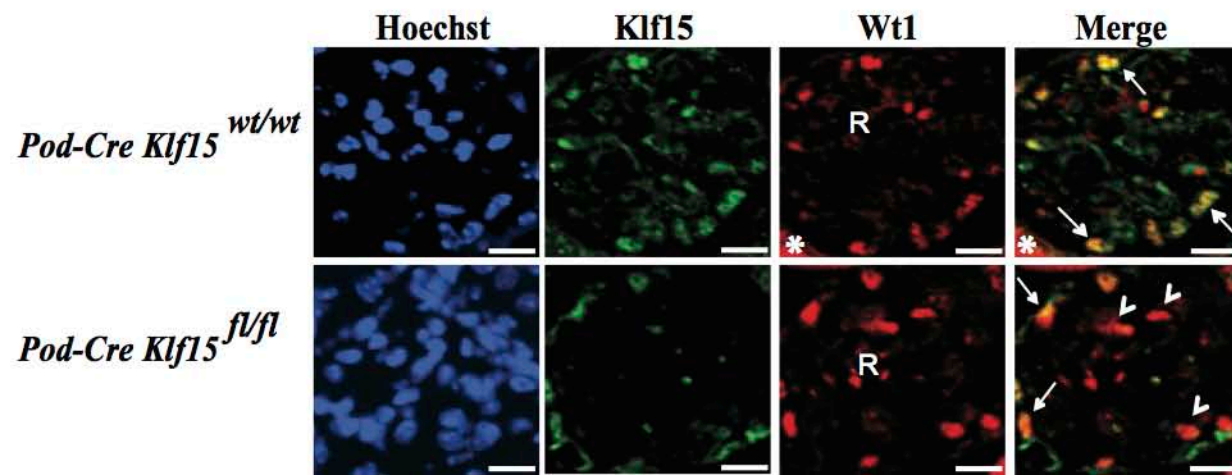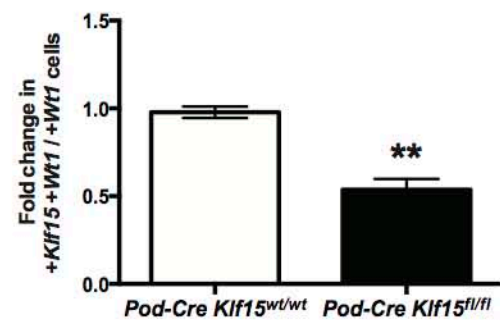

# Supplementary Figure 2

## A

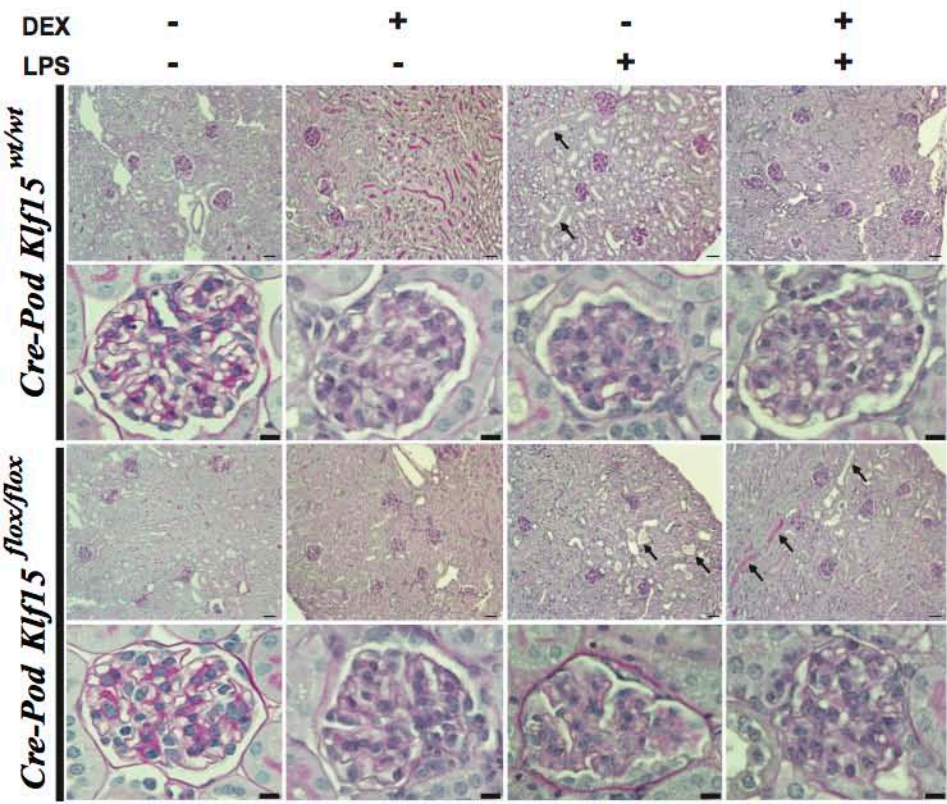

## B

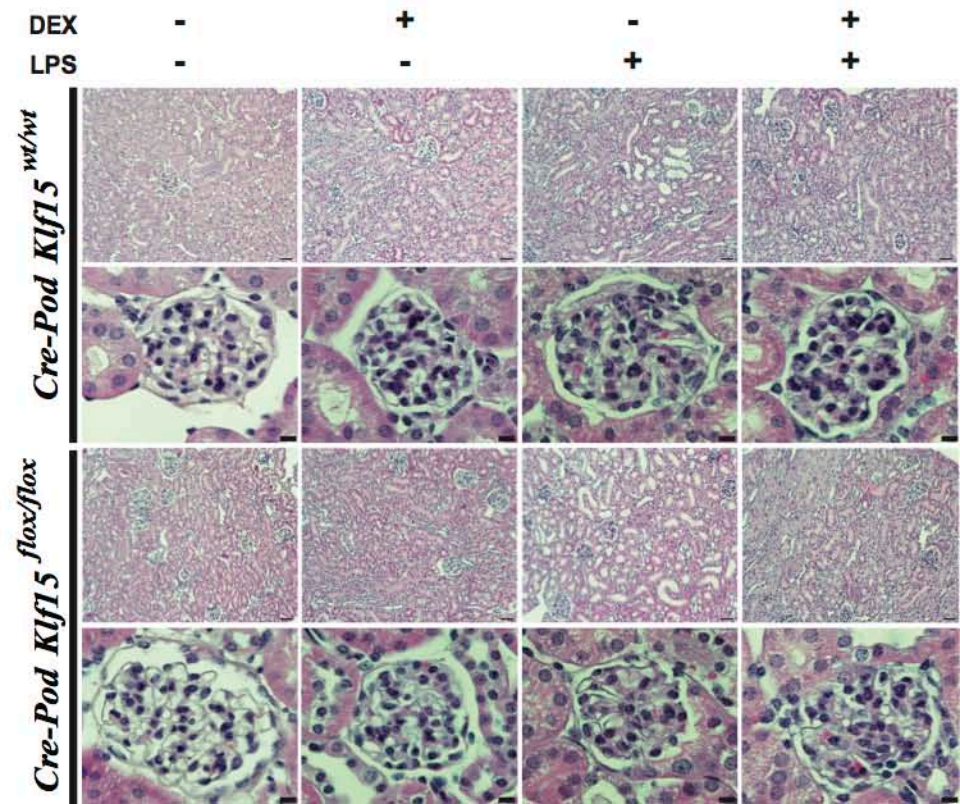

# Supplementary Figure 3

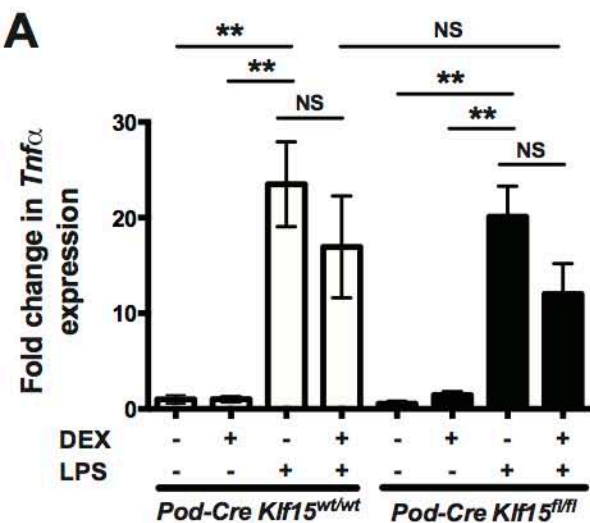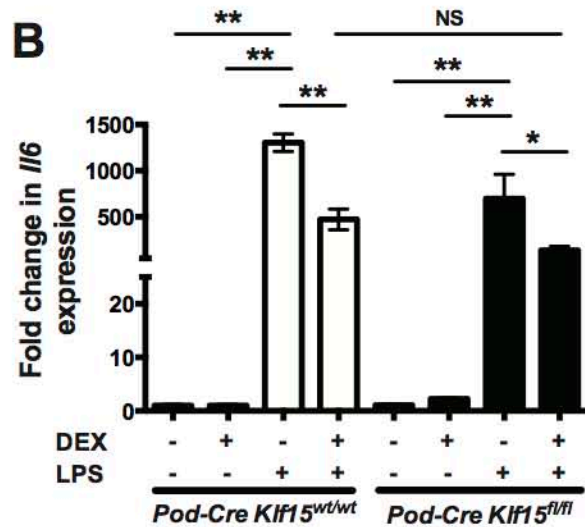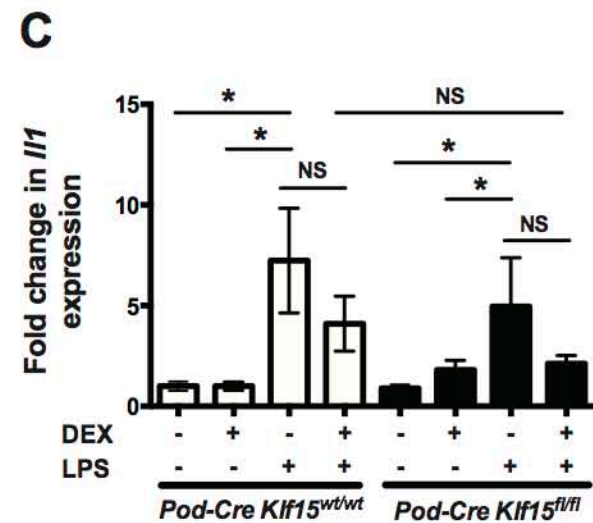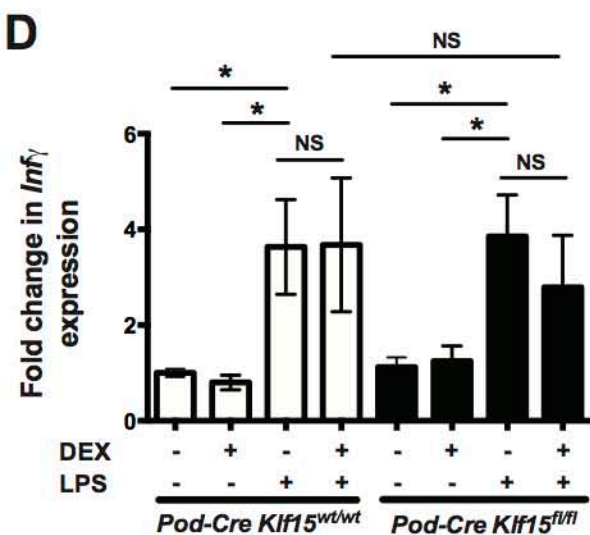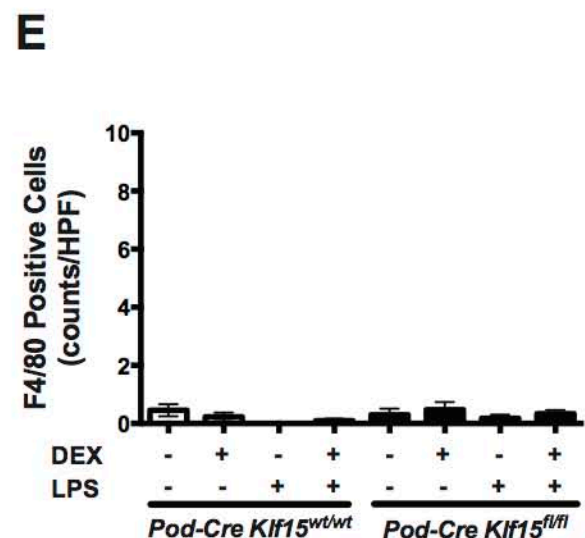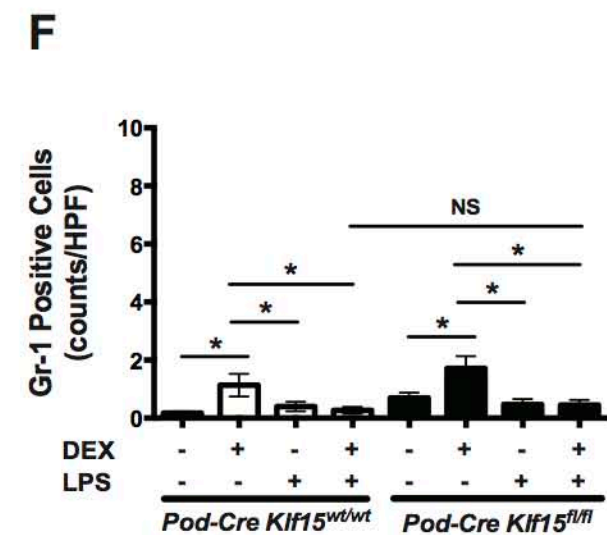

# Supplementary Figure 4

**A**

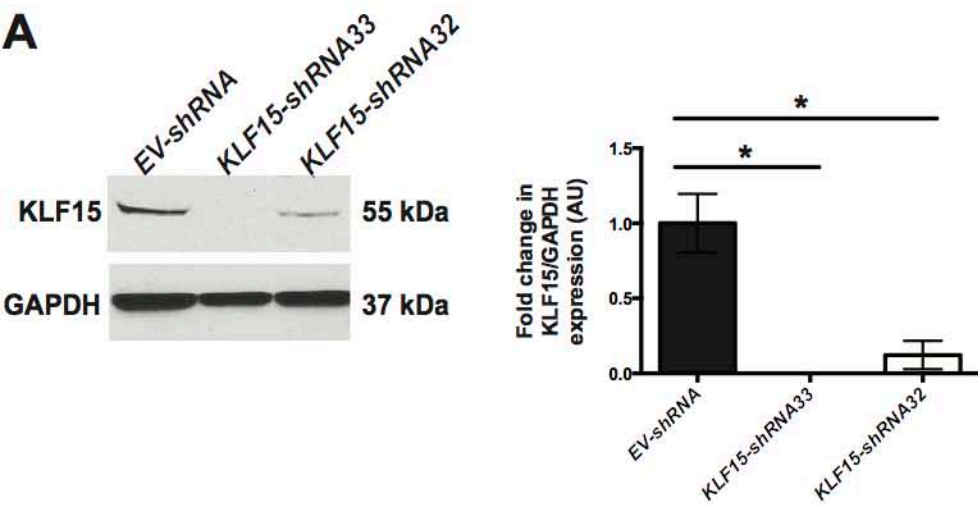

**B**

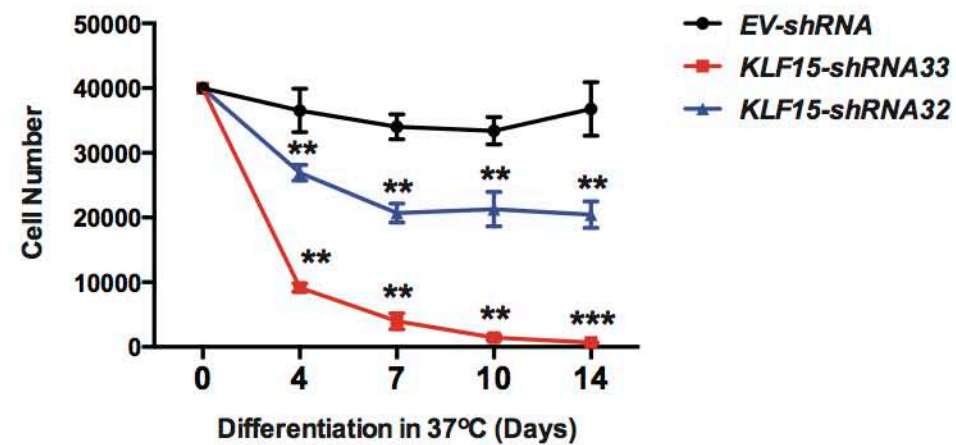

**C**

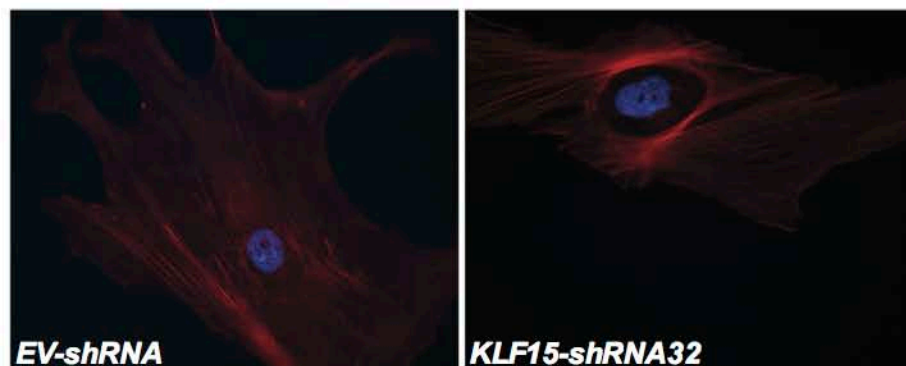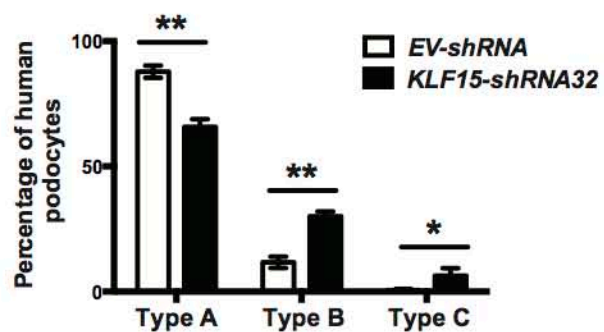

**D**

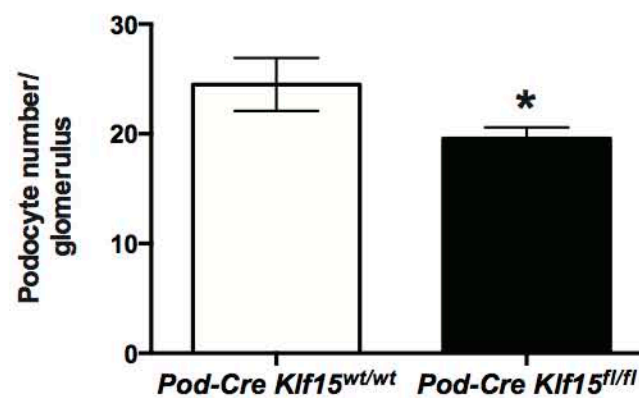

# Supplementary Figure 5

**A**

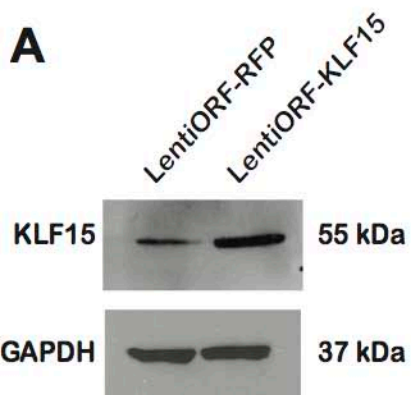

**B**

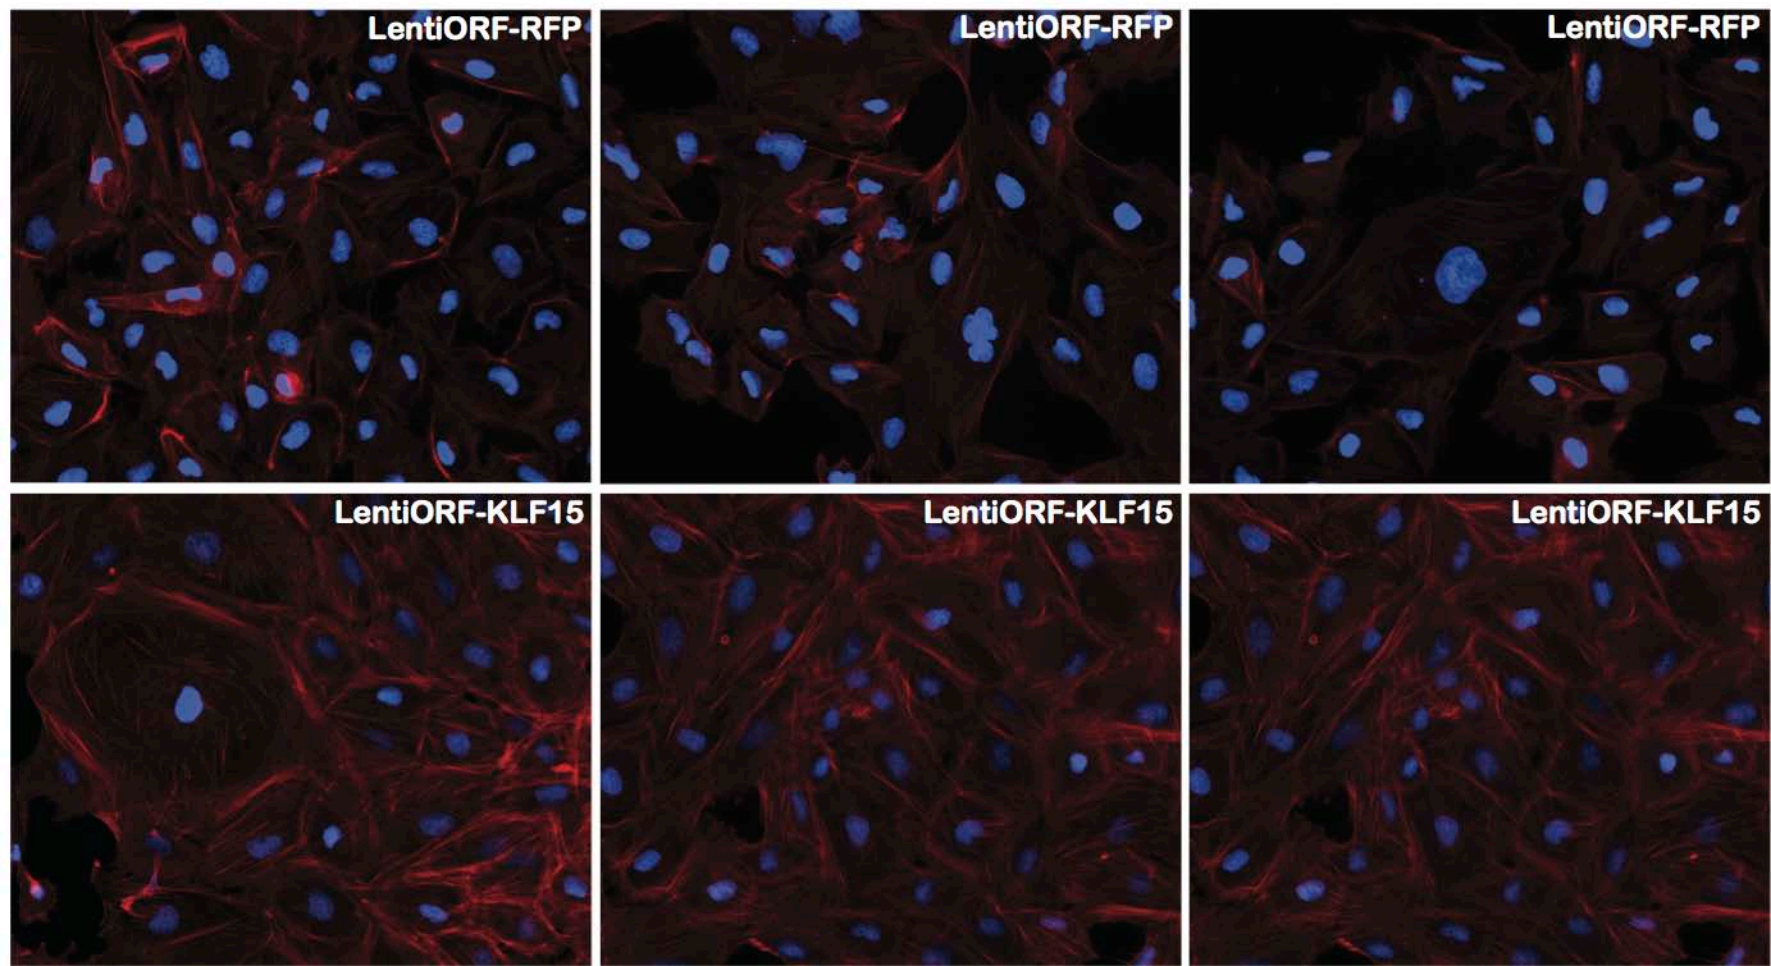



# Supplementary Figure 6

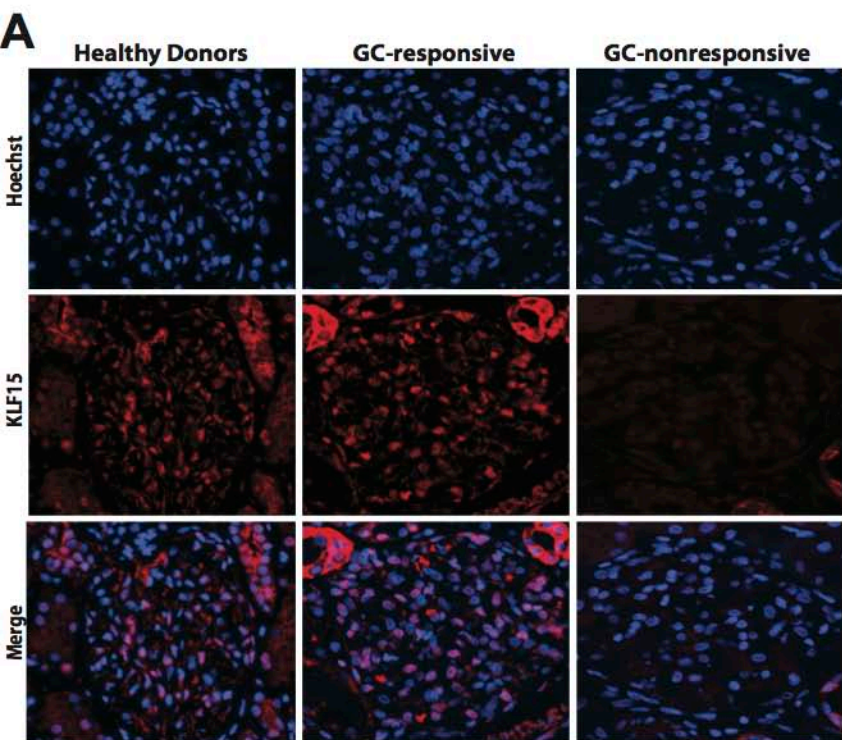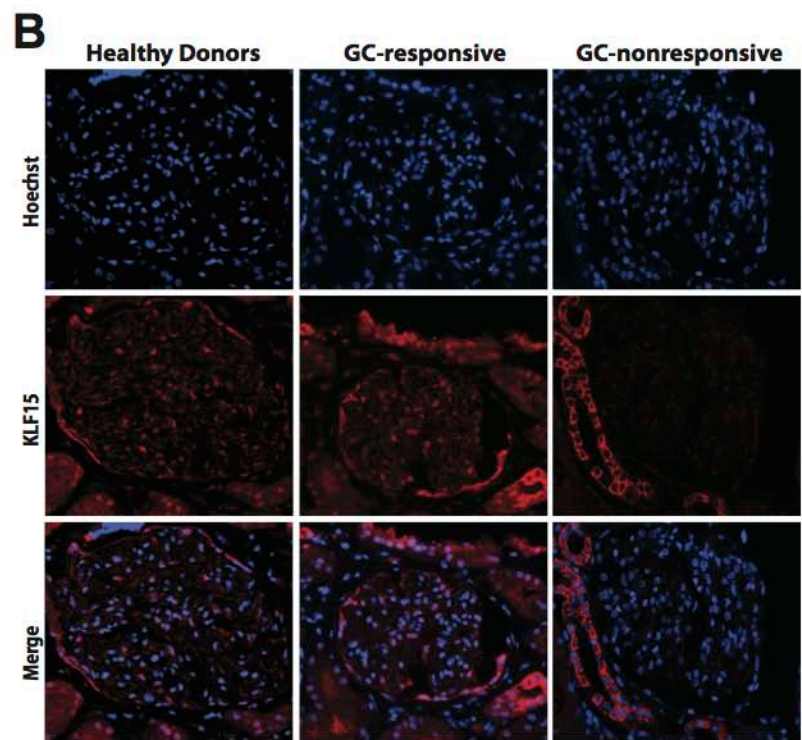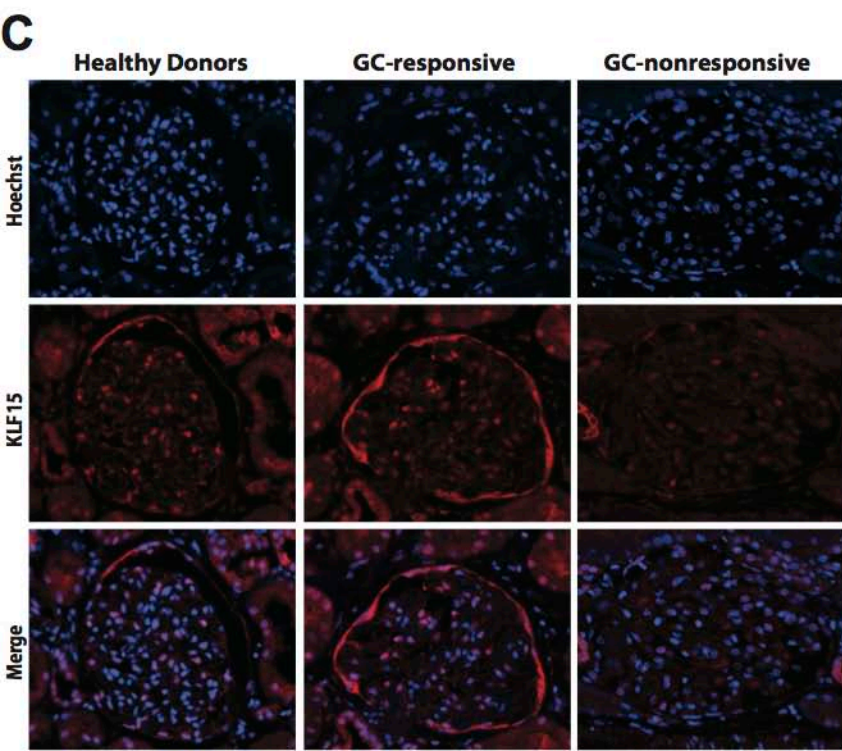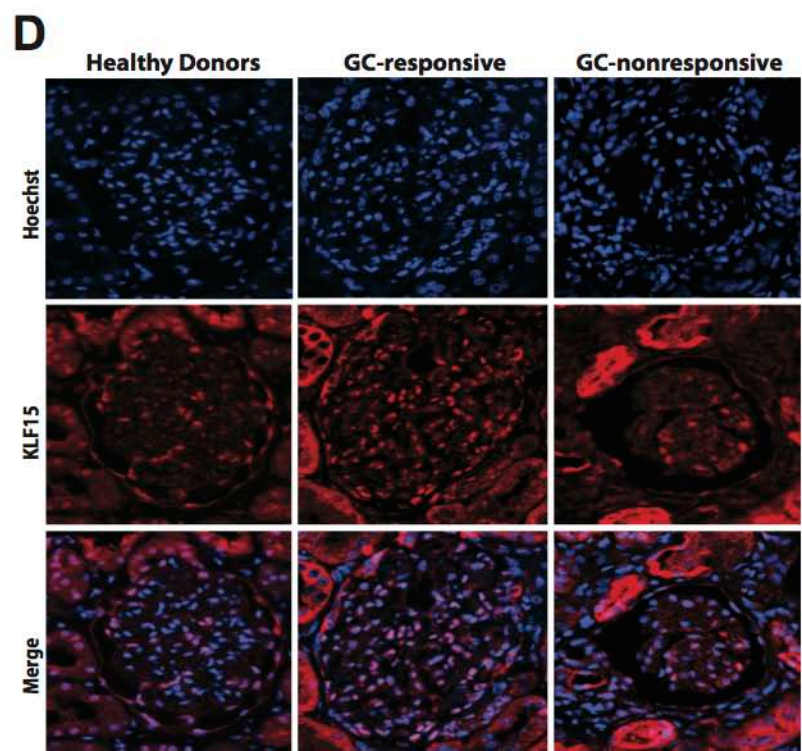

# Supplementary Figure 7

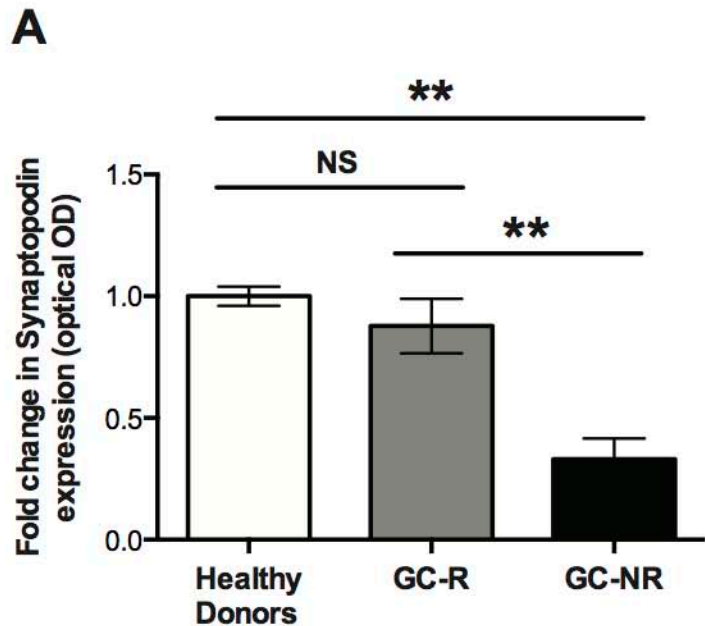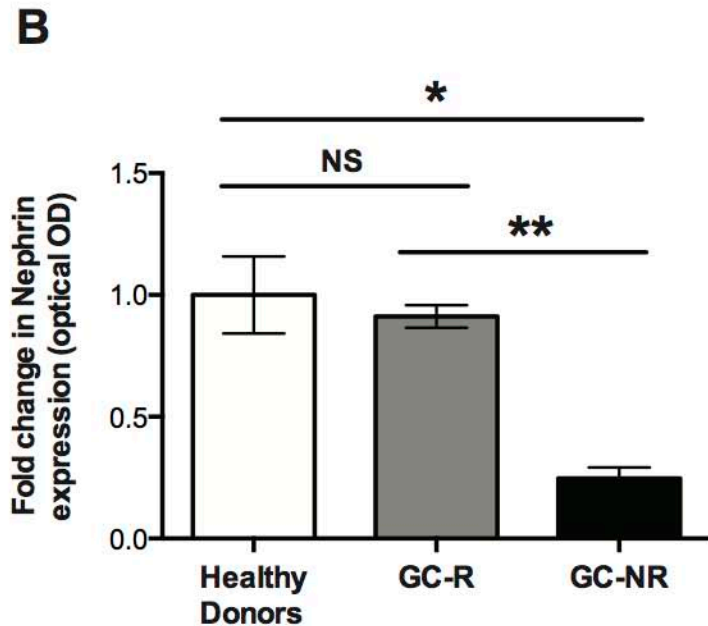

# Supplementary Figure 8

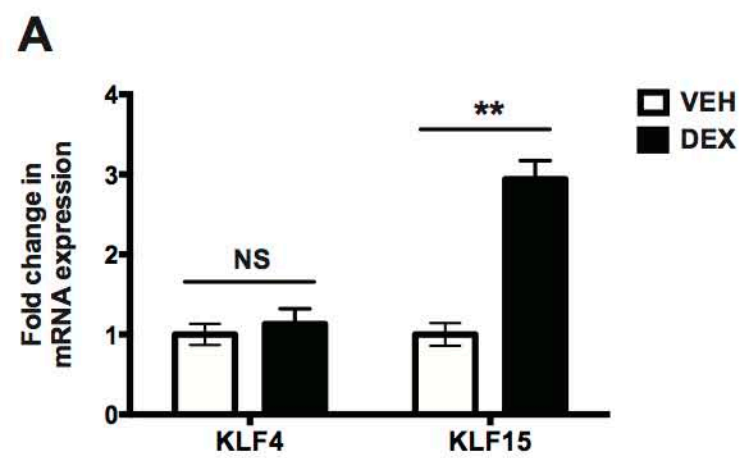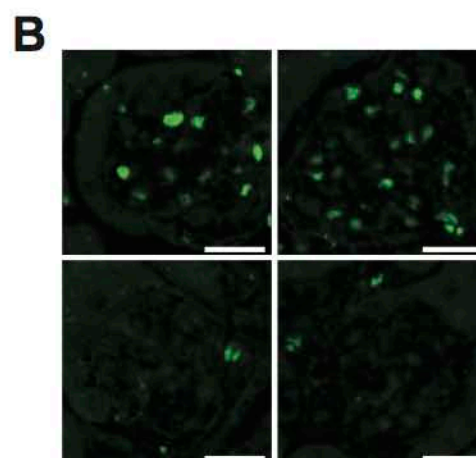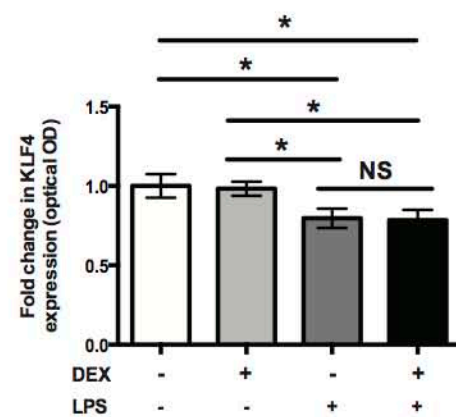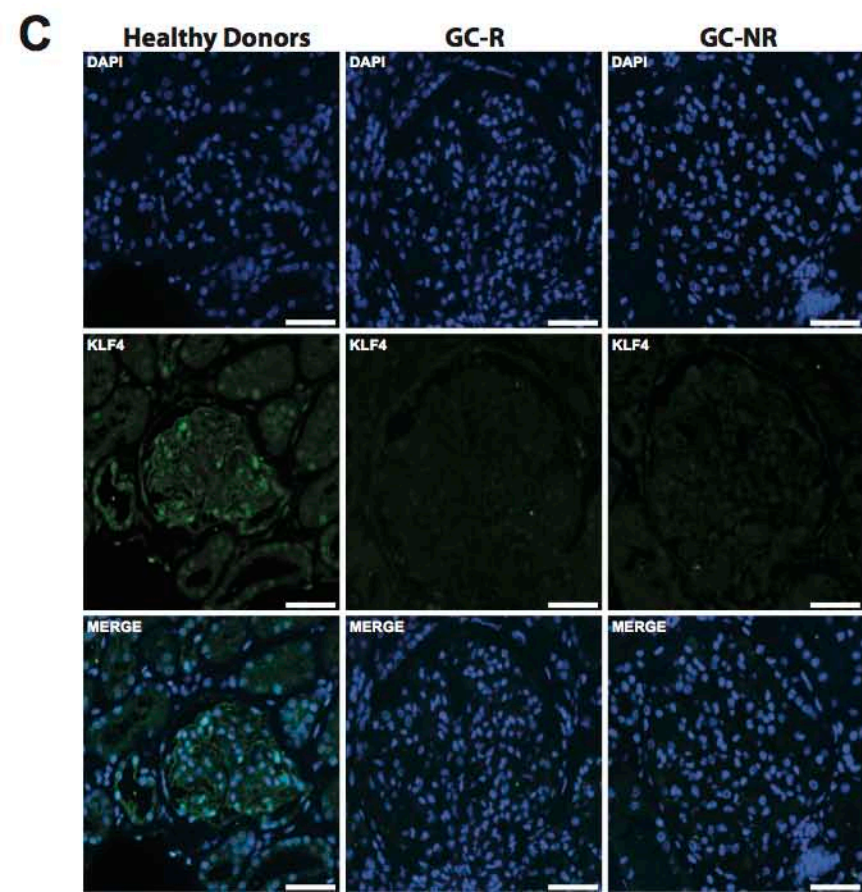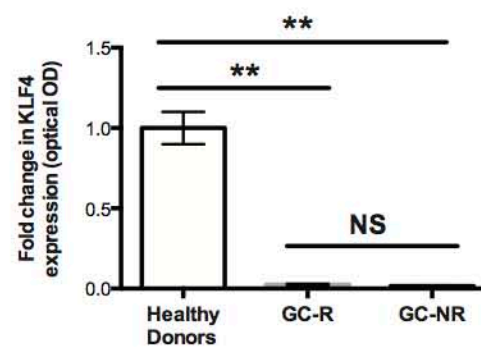

| <b>Gene Name</b> | <b>Binding sites</b> |
|------------------|----------------------|
| CTCF             | 233                  |
| PARD3            | 55                   |
| KCNQ2            | 50                   |
| C8orf58          | 45                   |
| PDE9A            | 40                   |
| PPAP2C           | 40                   |
| TCF7L2           | 39                   |
| KCNMA1           | 36                   |
| CACNA1G          | 33                   |
| GAA              | 33                   |
| C17orf76-AS1     | 32                   |
| METTL23          | 28                   |
| ZBTB24           | 26                   |
| DDIT3            | 24                   |
| DPEP1            | 24                   |
| MYLK             | 24                   |
| CACNA1C          | 23                   |
| DISC1            | 23                   |
| KCNAB2           | 22                   |
| GSN              | 21                   |
| JOSD2            | 20                   |
| PCID2            | 20                   |
| RNPC3            | 20                   |
| MEIS2            | 19                   |
| TP53             | 19                   |
| ERBB2IP          | 18                   |
| IRF3             | 18                   |
| KLF11            | 18                   |
| MFSD11           | 18                   |
| RAP1GDS1         | 18                   |
| TP73             | 18                   |
| WDR47            | 18                   |
| ECI2             | 17                   |
| C8orf33          | 16                   |
| FAM213B          | 16                   |
| ITGB2            | 16                   |
| KCNK7            | 16                   |
| MEG3             | 16                   |
| NFKBIL1          | 16                   |
| RNH1             | 16                   |
| TSNAX-DISC1      | 16                   |
| BBIP1            | 15                   |

|         |    |
|---------|----|
| CLN8    | 15 |
| CPSF3L  | 15 |
| FERMT2  | 15 |
| FOLH1   | 15 |
| NPHS1   | 15 |
| PAX2    | 15 |
| RNF38   | 15 |
| SYNCRIP | 15 |
| ZGPAT   | 15 |
| ATP2A3  | 14 |
| BEAN1   | 14 |
| BRSK2   | 14 |
| BTBD2   | 14 |
| COL6A1  | 14 |
| DNAJB5  | 14 |
| NUDT8   | 14 |
| RBFA    | 14 |
| ZFYVE28 | 14 |
| ZNF419  | 14 |
| ZXDC    | 14 |
| ARFRP1  | 13 |
| OPRL1   | 13 |
| TCF7    | 13 |
| ADAM8   | 12 |
| ADRM1   | 12 |
| AKIP1   | 12 |
| AKR1E2  | 12 |
| BAG6    | 12 |
| CHCHD7  | 12 |
| CHRNA4  | 12 |
| CIRBP   | 12 |
| CXCL12  | 12 |
| GCNT3   | 12 |
| GNL3    | 12 |
| HNRNPF  | 12 |
| KAT6A   | 12 |
| KCNC4   | 12 |
| KTN1    | 12 |
| LAMTOR2 | 12 |
| LSS     | 12 |
| MEF2A   | 12 |
| MYADM   | 12 |
| NCAPH2  | 12 |

|              |    |
|--------------|----|
| NIPA2        | 12 |
| NMRK1        | 12 |
| NR4A3        | 12 |
| NT5C3L       | 12 |
| PCMT1        | 12 |
| PEG10        | 12 |
| PTCH1        | 12 |
| PTPN2        | 12 |
| RCAN3AS      | 12 |
| RNF170       | 12 |
| SERPINA1     | 12 |
| SEZ6L2       | 12 |
| SIRT2        | 12 |
| SNAP91       | 12 |
| TEX264       | 12 |
| TRPC4        | 12 |
| TVP23C       | 12 |
| TVP23C-CDRT4 | 12 |
| URM1         | 12 |
| WDR45L       | 12 |
| CCDC112      | 11 |
| CTDSP1       | 11 |
| HDLBP        | 11 |
| LIMS2        | 11 |
| NFATC1       | 11 |
| ACVR1        | 10 |
| BCL2L13      | 10 |
| BZRAP1-AS1   | 10 |
| CACNA1A      | 10 |
| CD8B         | 10 |
| CHRD         | 10 |
| CSK          | 10 |
| DAP3         | 10 |
| DCAF4        | 10 |
| DGCR2        | 10 |
| DNAJC16      | 10 |
| DNMT3B       | 10 |
| EWSR1        | 10 |
| EZH2         | 10 |
| FBXO44       | 10 |
| FGD5-AS1     | 10 |
| FOXP1        | 10 |
| GPRASP2      | 10 |

|          |    |
|----------|----|
| LRRC20   | 10 |
| MAPK9    | 10 |
| NPRL3    | 10 |
| PRSS21   | 10 |
| PTGER3   | 10 |
| RAD54L   | 10 |
| RNF146   | 10 |
| SFI1     | 10 |
| SMAD2    | 10 |
| ANAPC10  | 9  |
| ATAD3A   | 9  |
| BLNK     | 9  |
| CCNT2    | 9  |
| DERL3    | 9  |
| FGFRL1   | 9  |
| GPR64    | 9  |
| IFT81    | 9  |
| IGSF1    | 9  |
| KLK6     | 9  |
| MARVELD3 | 9  |
| NAA10    | 9  |
| NCOR2    | 9  |
| NFIC     | 9  |
| NOVA1    | 9  |
| OPRM1    | 9  |
| PHF1     | 9  |
| PICALM   | 9  |
| PPARD    | 9  |
| RNF145   | 9  |
| RNF212   | 9  |
| RTN2     | 9  |
| SEC14L1  | 9  |
| TCF4     | 9  |
| ACP1     | 8  |
| ARHGAP22 | 8  |
| ARHGEF18 | 8  |
| B4GALNT4 | 8  |
| BBS9     | 8  |
| BCAP31   | 8  |
| C17orf70 | 8  |
| CAMK2B   | 8  |
| CAPN10   | 8  |
| CARHSP1  | 8  |

|          |   |
|----------|---|
| CD209    | 8 |
| CHRND    | 8 |
| CRNDE    | 8 |
| DRD2     | 8 |
| F7       | 8 |
| FAM86A   | 8 |
| FAM86JP  | 8 |
| FLJ42875 | 8 |
| GATA3    | 8 |
| GPC3     | 8 |
| GPRASP1  | 8 |
| HMGA1    | 8 |
| HNRNPR   | 8 |
| JAKMIP2  | 8 |
| KCNH6    | 8 |
| LEF1     | 8 |
| LRTOMT   | 8 |
| MBOAT7   | 8 |
| MMD2     | 8 |
| MPP1     | 8 |
| MRPL55   | 8 |
| NFATC2   | 8 |
| NOTUM    | 8 |
| NREP     | 8 |
| NUDT16   | 8 |
| NUDT7    | 8 |
| ORAI2    | 8 |
| OSBPL6   | 8 |
| PDE4DIP  | 8 |
| PDP1     | 8 |
| PHPT1    | 8 |
| PLEC     | 8 |
| PRR5     | 8 |
| QKI      | 8 |
| RAB3IP   | 8 |
| RAD23A   | 8 |
| RGS6     | 8 |
| RQCD1    | 8 |
| SCMH1    | 8 |
| SF1      | 8 |
| SLC16A3  | 8 |
| SLC25A1  | 8 |
| SLC2A8   | 8 |



|          |   |
|----------|---|
| SUFU     | 8 |
| THRA     | 8 |
| UBE2J2   | 8 |
| WDR46    | 8 |
| ZNF655   | 8 |
| ABLIM2   | 7 |
| ADD2     | 7 |
| ANKRD6   | 7 |
| ARRB2    | 7 |
| BRF1     | 7 |
| CD63     | 7 |
| CHRAC1   | 7 |
| CMKLR1   | 7 |
| CPT1A    | 7 |
| DBI      | 7 |
| DBNDD2   | 7 |
| EEF1D    | 7 |
| EIF6     | 7 |
| ELP2     | 7 |
| HIVEP1   | 7 |
| LAMC1    | 7 |
| MAGEA4   | 7 |
| MEN1     | 7 |
| MMGT1    | 7 |
| NEDD4L   | 7 |
| NLRP2    | 7 |
| PBX2     | 7 |
| PCYT2    | 7 |
| PLEKHG4  | 7 |
| POLE     | 7 |
| PSD      | 7 |
| PSMG4    | 7 |
| RAD21L1  | 7 |
| SCP2     | 7 |
| SLC16A7  | 7 |
| SMUG1    | 7 |
| SPINK2   | 7 |
| SPIRE2   | 7 |
| SSR4     | 7 |
| TARSL2   | 7 |
| THTPA    | 7 |
| TMEM176B | 7 |
| TPM1     | 7 |

|          |   |
|----------|---|
| WT1      | 7 |
| ZFAND6   | 7 |
| ZNF385A  | 7 |
| ZNF559   | 7 |
| ZNF641   | 7 |
| ABR      | 6 |
| ACAA1    | 6 |
| ACD      | 6 |
| ADK      | 6 |
| ADPGK    | 6 |
| AIFM3    | 6 |
| ALOX15B  | 6 |
| ANAPC16  | 6 |
| ANK1     | 6 |
| APBB2    | 6 |
| APH1B    | 6 |
| ARHGAP4  | 6 |
| ARMCX5   | 6 |
| ASIC1    | 6 |
| ASTN2    | 6 |
| ATG13    | 6 |
| ATP5D    | 6 |
| ATP8B3   | 6 |
| ATXN2L   | 6 |
| AURKA    | 6 |
| BCL11A   | 6 |
| C10orf91 | 6 |
| C6orf1   | 6 |
| C6orf25  | 6 |
| CACNA1H  | 6 |
| CACNB2   | 6 |
| CAPZB    | 6 |
| CASP10   | 6 |
| CCDC122  | 6 |
| CCDC59   | 6 |
| CCT7     | 6 |
| CDH15    | 6 |
| CDK10    | 6 |
| CDK11B   | 6 |
| CDK13    | 6 |
| CDKN1C   | 6 |
| CECR6    | 6 |
| CES3     | 6 |

|          |   |
|----------|---|
| CHMP1A   | 6 |
| CLINT1   | 6 |
| CLMN     | 6 |
| CLTB     | 6 |
| COL13A1  | 6 |
| CPEB2    | 6 |
| CREM     | 6 |
| CUL3     | 6 |
| CXorf40A | 6 |
| DACH1    | 6 |
| DGKZ     | 6 |
| DNASE1L1 | 6 |
| DOLPP1   | 6 |
| DPYSL2   | 6 |
| DSTN     | 6 |
| DUSP15   | 6 |
| ECE2     | 6 |
| EFCAB2   | 6 |
| ENDOU    | 6 |
| EPS15L1  | 6 |
| EPS8L3   | 6 |
| ERP29    | 6 |
| ETV1     | 6 |
| EXTL2    | 6 |
| FAHD1    | 6 |
| FAM115C  | 6 |
| FAM120C  | 6 |
| FAM173B  | 6 |
| FAM217B  | 6 |
| FAM86B3P | 6 |
| FAM86C1  | 6 |
| FGFR1    | 6 |
| FLT4     | 6 |
| FOXP4    | 6 |
| FRS2     | 6 |
| GCFC2    | 6 |
| GDAP1L1  | 6 |
| GDI2     | 6 |
| GLYCK    | 6 |
| GOLGA7   | 6 |
| GPOR     | 6 |
| GPR1     | 6 |
| GPSM1    | 6 |

|              |   |
|--------------|---|
| HAUS7        | 6 |
| HCK          | 6 |
| HDAC11       | 6 |
| IFNLR1       | 6 |
| IL6ST        | 6 |
| INF2         | 6 |
| IRF4         | 6 |
| ISCA2        | 6 |
| ITPK1        | 6 |
| JPH3         | 6 |
| JPH4         | 6 |
| JRK          | 6 |
| KCND3        | 6 |
| KDM1B        | 6 |
| LMAN2L       | 6 |
| LOC100507557 | 6 |
| LOC283050    | 6 |
| LOC91948     | 6 |
| LRRC4B       | 6 |
| LTBP3        | 6 |
| MAGEA10      | 6 |
| MAOA         | 6 |
| MEGF8        | 6 |
| MEST         | 6 |
| MIB2         | 6 |
| MLF1         | 6 |
| MLL5         | 6 |
| MYBL1        | 6 |
| NDUFA11      | 6 |
| NFAT5        | 6 |
| NFATC3       | 6 |
| NFIX         | 6 |
| NFX1         | 6 |
| NKIRAS2      | 6 |
| NOX5         | 6 |
| NR2F2        | 6 |
| NRP2         | 6 |
| PDE8A        | 6 |
| PHACTR3      | 6 |
| PHF8         | 6 |
| PICK1        | 6 |
| PITRM1       | 6 |
| PITX2        | 6 |

|           |   |
|-----------|---|
| PLK1S1    | 6 |
| PNPLA7    | 6 |
| PPP6R3    | 6 |
| PRELP     | 6 |
| PRNP      | 6 |
| PRR24     | 6 |
| PTPN5     | 6 |
| PUS3      | 6 |
| RAD23B    | 6 |
| RAP1B     | 6 |
| RASSF5    | 6 |
| RFX3      | 6 |
| RPP25L    | 6 |
| SARS      | 6 |
| SF3B14    | 6 |
| SH2D3C    | 6 |
| SHISA6    | 6 |
| SIRT6     | 6 |
| SLC12A6   | 6 |
| SLC25A25  | 6 |
| SLC35C2   | 6 |
| SLC39A1   | 6 |
| SLC44A3   | 6 |
| SLC8A3    | 6 |
| SNX15     | 6 |
| SP3       | 6 |
| SPATA20   | 6 |
| SPINT2    | 6 |
| SUV39H2   | 6 |
| SYT14     | 6 |
| TESC      | 6 |
| TMEM25    | 6 |
| TNFRSF10B | 6 |
| TP53I3    | 6 |
| TPI1      | 6 |
| TPTE      | 6 |
| TRIM65    | 6 |
| TSPAN9    | 6 |
| TUBD1     | 6 |
| UBE2G2    | 6 |
| UBE2W     | 6 |
| USP34     | 6 |
| VSX1      | 6 |

|          |   |
|----------|---|
| ZNF276   | 6 |
| ZNF295   | 6 |
| ZNF562   | 6 |
| 42073    | 5 |
| ADAMTS10 | 5 |
| AIFM1    | 5 |
| AKT1     | 5 |
| ALKBH2   | 5 |
| AMMECR1L | 5 |
| AMT      | 5 |
| AP5B1    | 5 |
| ARHGAP12 | 5 |
| ASPH     | 5 |
| ATG16L1  | 5 |
| BAX      | 5 |
| BDNF     | 5 |
| BDNF-AS  | 5 |
| C16orf13 | 5 |
| C4BPB    | 5 |
| C5orf44  | 5 |
| CAPRIN2  | 5 |
| CCDC85C  | 5 |
| CD164    | 5 |
| CD99L2   | 5 |
| CENPN    | 5 |
| CHFR     | 5 |
| COPZ1    | 5 |
| CRHR2    | 5 |
| CRIP2    | 5 |
| CSAD     | 5 |
| CTSB     | 5 |
| CUTA     | 5 |
| CXorf40B | 5 |
| CYB561D1 | 5 |
| DBN1     | 5 |
| DCAF8    | 5 |
| DDR1     | 5 |
| DEPDC5   | 5 |
| DUX2     | 5 |
| DUX4     | 5 |
| DUX4L2   | 5 |
| DUX4L3   | 5 |
| DUX4L4   | 5 |

|            |   |
|------------|---|
| DUX4L5     | 5 |
| DUX4L6     | 5 |
| DUX4L7     | 5 |
| ELN        | 5 |
| ERC1       | 5 |
| ESRP1      | 5 |
| FAM102A    | 5 |
| FAM63A     | 5 |
| FAM86C2P   | 5 |
| FAM86HP    | 5 |
| FBXL19-AS1 | 5 |
| FDPS       | 5 |
| FHL1       | 5 |
| FLII       | 5 |
| FNDC5      | 5 |
| FOLR1      | 5 |
| FSTL3      | 5 |
| GIPC1      | 5 |
| GPC1       | 5 |
| GPN1       | 5 |
| GTF2I      | 5 |
| HAS3       | 5 |
| HTATIP2    | 5 |
| INPP5A     | 5 |
| IQSEC1     | 5 |
| IST1       | 5 |
| ISYNA1     | 5 |
| KIAA1598   | 5 |
| KIF13A     | 5 |
| LDHA       | 5 |
| LMF1       | 5 |
| LRBA       | 5 |
| LRRFIP1    | 5 |
| MAGEA11    | 5 |
| MARK2      | 5 |
| MARK3      | 5 |
| MATN1-AS1  | 5 |
| MEPCE      | 5 |
| MMP23B     | 5 |
| MRAS       | 5 |
| NCR1       | 5 |
| NELF       | 5 |
| NLRP1      | 5 |

|             |   |
|-------------|---|
| NT5DC2      | 5 |
| PAX6        | 5 |
| PDCD6       | 5 |
| PDYN        | 5 |
| PEX11B      | 5 |
| PHC2        | 5 |
| PIK3R5      | 5 |
| POLD4       | 5 |
| PPM1B       | 5 |
| PRAME       | 5 |
| PRKD2       | 5 |
| PROX1       | 5 |
| PSMG2       | 5 |
| RAB40C      | 5 |
| RAP1GAP     | 5 |
| RARG        | 5 |
| RBM10       | 5 |
| RFPL3       | 5 |
| RNF41       | 5 |
| RPL28       | 5 |
| SCARF1      | 5 |
| SEC23B      | 5 |
| SLC3A2      | 5 |
| SLITRK4     | 5 |
| SMPD4       | 5 |
| SPAM1       | 5 |
| SQSTM1      | 5 |
| SVIP        | 5 |
| TGFB1I1     | 5 |
| TMEM141     | 5 |
| TMEM254-AS1 | 5 |
| TP73-AS1    | 5 |
| TRIM11      | 5 |
| TRIM7       | 5 |
| TSEN2       | 5 |
| TTYH2       | 5 |
| TYMP        | 5 |
| VIPAS39     | 5 |
| XRCC6BP1    | 5 |
| ZBTB7B      | 5 |
| ZNF467      | 5 |
| AAED1       | 4 |
| ABCC11      | 4 |



|          |   |
|----------|---|
| ACAA2    | 4 |
| ACIN1    | 4 |
| ACRV1    | 4 |
| ACSF2    | 4 |
| ACSL3    | 4 |
| ACVR2B   | 4 |
| ADAMTS14 | 4 |
| ADCK4    | 4 |
| ADCY9    | 4 |
| ADM2     | 4 |
| ADNP     | 4 |
| AGPAT2   | 4 |
| AJUBA    | 4 |
| AK7      | 4 |
| AKD1     | 4 |
| ALG3     | 4 |
| ANKRD33B | 4 |
| ANKS1B   | 4 |
| ANO7     | 4 |
| ANXA2    | 4 |
| AP3D1    | 4 |
| APOBEC3H | 4 |
| ARF1     | 4 |
| ARFGAP1  | 4 |
| ASB10    | 4 |
| ATP2C1   | 4 |
| ATP5A1   | 4 |
| ATP5S    | 4 |
| ATXN1    | 4 |
| AZI1     | 4 |
| B9D1     | 4 |
| BAIAP2   | 4 |
| BAIAP3   | 4 |
| BAP1     | 4 |
| BCOR     | 4 |
| BIRC7    | 4 |
| BLCAP    | 4 |
| BSCL2    | 4 |
| C11orf35 | 4 |
| C11orf68 | 4 |
| C1QTNF4  | 4 |
| C21orf90 | 4 |
| C4orf48  | 4 |

|          |   |
|----------|---|
| CA1      | 4 |
| CADM2    | 4 |
| CAPN1    | 4 |
| CBX2     | 4 |
| CCDC96   | 4 |
| CCL25    | 4 |
| CCM2     | 4 |
| CCND3    | 4 |
| CD151    | 4 |
| CD59     | 4 |
| CDCA8    | 4 |
| CELF2    | 4 |
| CELF4    | 4 |
| CHKA     | 4 |
| CHST15   | 4 |
| CHTF18   | 4 |
| CIDEC    | 4 |
| CISH     | 4 |
| CITED1   | 4 |
| CLASP1   | 4 |
| CLK1     | 4 |
| CMIP     | 4 |
| CMTM4    | 4 |
| CNOT6L   | 4 |
| COL2A1   | 4 |
| CPT1C    | 4 |
| CREB3L3  | 4 |
| CRTAC1   | 4 |
| CSHL1    | 4 |
| CSNK1D   | 4 |
| CSTB     | 4 |
| CTBP1    | 4 |
| CTNNBIP1 | 4 |
| CYB5R3   | 4 |
| DCHS2    | 4 |
| DCXR     | 4 |
| DGAT2    | 4 |
| DGKA     | 4 |
| DGKQ     | 4 |
| DHPS     | 4 |
| DIABLO   | 4 |
| DLL4     | 4 |
| DMC1     | 4 |

|          |   |
|----------|---|
| DNAJC21  | 4 |
| DNER     | 4 |
| DOCK9    | 4 |
| DOK7     | 4 |
| DPP10    | 4 |
| DUOX1    | 4 |
| EFS      | 4 |
| EGFR     | 4 |
| EGLN2    | 4 |
| EIF2C2   | 4 |
| ENAH     | 4 |
| ENOPH1   | 4 |
| EPHX2    | 4 |
| ETS1     | 4 |
| FAM131A  | 4 |
| FAM172A  | 4 |
| FAN1     | 4 |
| FASN     | 4 |
| FBLN1    | 4 |
| FBXO33   | 4 |
| FGF8     | 4 |
| FLAD1    | 4 |
| FLJ42709 | 4 |
| FN3K     | 4 |
| FTCD     | 4 |
| FUS      | 4 |
| FXYD5    | 4 |
| GAB3     | 4 |
| GABRG3   | 4 |
| GAS6     | 4 |
| GDNF     | 4 |
| GDPD2    | 4 |
| GDPD4    | 4 |
| GGPS1    | 4 |
| GGT1     | 4 |
| GH2      | 4 |
| GHDC     | 4 |
| GLRA2    | 4 |
| GM2A     | 4 |
| GMPPA    | 4 |
| GNG4     | 4 |
| GPR137   | 4 |
| GPR35    | 4 |

|              |   |
|--------------|---|
| GPS1         | 4 |
| GREB1        | 4 |
| GRTP1        | 4 |
| GSK3B        | 4 |
| HCST         | 4 |
| HDAC7        | 4 |
| HERC3        | 4 |
| HES6         | 4 |
| HINT1        | 4 |
| HNRNPD       | 4 |
| HPSE2        | 4 |
| HTT          | 4 |
| IFT122       | 4 |
| ING1         | 4 |
| IRF2BP2      | 4 |
| JOSD1        | 4 |
| KCNK13       | 4 |
| KIAA1755     | 4 |
| KIF21B       | 4 |
| KLF6         | 4 |
| KLHDC3       | 4 |
| KLHDC8A      | 4 |
| KREMEN2      | 4 |
| LAMP2        | 4 |
| LCOR         | 4 |
| LDHD         | 4 |
| LECT1        | 4 |
| LGMN         | 4 |
| LIMD2        | 4 |
| LOC100128252 | 4 |
| LOC100131089 | 4 |
| LOC100289092 | 4 |
| LOC100505695 | 4 |
| LOC100507547 | 4 |
| LOC642852    | 4 |
| LOC645249    | 4 |
| LPHN1        | 4 |
| LPPR2        | 4 |
| LPPR3        | 4 |
| LPPR5        | 4 |
| LRR1         | 4 |
| LRRC17       | 4 |
| LRRC27       | 4 |

|             |   |
|-------------|---|
| LRRC42      | 4 |
| LRRC48      | 4 |
| LY6E        | 4 |
| MAFIP       | 4 |
| MAGED4      | 4 |
| MAGED4B     | 4 |
| MAGI2-AS3   | 4 |
| MAP3K14-AS1 | 4 |
| MAPK10      | 4 |
| MAPK11      | 4 |
| MARCKSL1    | 4 |
| MARK4       | 4 |
| ME2         | 4 |
| MEIOB       | 4 |
| MGC16275    | 4 |
| MGEA5       | 4 |
| MIR1253     | 4 |
| MIR129-1    | 4 |
| MIR212      | 4 |
| MIR3922     | 4 |
| MIR4729     | 4 |
| MLST8       | 4 |
| MPP3        | 4 |
| MSANTD3     | 4 |
| NELL2       | 4 |
| NFIB        | 4 |
| NOS1        | 4 |
| NRCAM       | 4 |
| NRXN3       | 4 |
| NUDT16P1    | 4 |
| OSBPL2      | 4 |
| OSBPL3      | 4 |
| OTX2        | 4 |
| PACSIN3     | 4 |
| PAK6        | 4 |
| PAX8        | 4 |
| PBX4        | 4 |
| PCSK1       | 4 |
| PDE4A       | 4 |
| PDHA1       | 4 |
| PFDN6       | 4 |
| PFKP        | 4 |
| PHOX2A      | 4 |

|          |   |
|----------|---|
| PIP4K2C  | 4 |
| PKD2L1   | 4 |
| PKP2     | 4 |
| PLXNB2   | 4 |
| PNMA5    | 4 |
| PORCN    | 4 |
| POU2F2   | 4 |
| PPARG    | 4 |
| PPP1R21  | 4 |
| PPP2R5D  | 4 |
| PPP4R4   | 4 |
| PPP6R2   | 4 |
| PRICKLE4 | 4 |
| PRKACA   | 4 |
| PRR5L    | 4 |
| PRSS55   | 4 |
| PSIP1    | 4 |
| PSMD13   | 4 |
| PWWP2B   | 4 |
| QTRTD1   | 4 |
| RALY     | 4 |
| RASA4    | 4 |
| RBBP7    | 4 |
| RBPJ     | 4 |
| RECQL    | 4 |
| RET      | 4 |
| RFC4     | 4 |
| RGMA     | 4 |
| RHBG     | 4 |
| RHCE     | 4 |
| RND3     | 4 |
| RNFT2    | 4 |
| RPL13    | 4 |
| RPS15A   | 4 |
| RTBDN    | 4 |
| RTN4     | 4 |
| RUFY2    | 4 |
| RUSC1    | 4 |
| RWDD3    | 4 |
| RYBP     | 4 |
| SALL1    | 4 |
| SAMD12   | 4 |
| SAMD4A   | 4 |

|         |   |
|---------|---|
| SBDSP1  | 4 |
| SCML1   | 4 |
| SDHC    | 4 |
| SEC13   | 4 |
| SEMA4A  | 4 |
| SEPN1   | 4 |
| SET     | 4 |
| SETD5   | 4 |
| SH3D21  | 4 |
| SIM2    | 4 |
| SLC10A7 | 4 |
| SLC15A3 | 4 |
| SLC4A2  | 4 |
| SLC6A12 | 4 |
| SLC7A3  | 4 |
| SLITRK2 | 4 |
| SMG7    | 4 |
| SNX6    | 4 |
| SPG20   | 4 |
| SPIB    | 4 |
| SPINT1  | 4 |
| SSC5D   | 4 |
| ST6GAL2 | 4 |
| STMN3   | 4 |
| STPG1   | 4 |
| STXBP2  | 4 |
| SUN2    | 4 |
| SYPL1   | 4 |
| SYT15   | 4 |
| SYTL2   | 4 |
| TAF11   | 4 |
| TAF15   | 4 |
| TAF8    | 4 |
| TBC1D23 | 4 |
| TBCD    | 4 |
| TCF19   | 4 |
| TEAD1   | 4 |
| TFG     | 4 |
| TGFB2   | 4 |
| THAP7   | 4 |
| THBS3   | 4 |
| TLX1    | 4 |
| TM2D2   | 4 |

|              |   |
|--------------|---|
| TMEM184B     | 4 |
| TMEM200A     | 4 |
| TMEM79       | 4 |
| TNNT3        | 4 |
| TPO          | 4 |
| TRABD        | 4 |
| TRAF3IP1     | 4 |
| TRAF3IP2-AS1 | 4 |
| TRAPPC3      | 4 |
| TRAPPC6A     | 4 |
| TRERF1       | 4 |
| TRIM13       | 4 |
| TRIM37       | 4 |
| TRIM55       | 4 |
| TRIOBP       | 4 |
| UBE2I        | 4 |
| UFD1L        | 4 |
| UHRF1BP1L    | 4 |
| URGCP        | 4 |
| VEGFB        | 4 |
| VPS13A       | 4 |
| VTN          | 4 |
| VWA2         | 4 |
| WDR62        | 4 |
| WDR83        | 4 |
| WHSC1L1      | 4 |
| WNK1         | 4 |
| WNT10A       | 4 |
| WNT9A        | 4 |
| ZCWPW1       | 4 |
| ZDHHC8       | 4 |
| ZNF44        | 4 |
| ZNF48        | 4 |
| ZNF503-AS2   | 4 |
| ZNF702P      | 4 |
| 42069        | 3 |
| 42072        | 3 |
| ACADVL       | 3 |
| ACOT8        | 3 |
| ACSS1        | 3 |
| ACTL6A       | 3 |
| ACTN1        | 3 |
| ADAMTS16     | 3 |



|           |   |
|-----------|---|
| ADAR      | 3 |
| ADCY4     | 3 |
| AES       | 3 |
| AGPAT9    | 3 |
| AHCTF1    | 3 |
| AIG1      | 3 |
| AIPL1     | 3 |
| ALDH8A1   | 3 |
| ANGPT4    | 3 |
| ANKRD12   | 3 |
| ANKRD16   | 3 |
| ANXA11    | 3 |
| AP1B1P1   | 3 |
| AP5S1     | 3 |
| APOA1     | 3 |
| ARHGEF16  | 3 |
| ARHGEF2   | 3 |
| ARHGEF25  | 3 |
| ARID4B    | 3 |
| ARL5A     | 3 |
| ARTN      | 3 |
| ASB13     | 3 |
| ASPHD1    | 3 |
| ATF7IP2   | 3 |
| ATP13A2   | 3 |
| ATP7B     | 3 |
| AVEN      | 3 |
| BCAR1     | 3 |
| BCAR3     | 3 |
| BHLHE23   | 3 |
| BIRC5     | 3 |
| BLOC1S5   | 3 |
| BMI1      | 3 |
| BRD9      | 3 |
| BRWD1     | 3 |
| C14orf93  | 3 |
| C15orf39  | 3 |
| C17orf51  | 3 |
| C17orf67  | 3 |
| C17orf80  | 3 |
| C1orf101  | 3 |
| C20orf112 | 3 |
| C2orf29   | 3 |

|          |   |
|----------|---|
| C6orf203 | 3 |
| C7orf50  | 3 |
| CAB39    | 3 |
| CADM4    | 3 |
| CAGE1    | 3 |
| CASS4    | 3 |
| CBL      | 3 |
| CBX3     | 3 |
| CBX3P2   | 3 |
| CBX4     | 3 |
| CCDC159  | 3 |
| CCKBR    | 3 |
| CD248    | 3 |
| CD302    | 3 |
| CD83     | 3 |
| CD97     | 3 |
| CDADC1   | 3 |
| CDC14A   | 3 |
| CDC20B   | 3 |
| CDC45    | 3 |
| CDHR5    | 3 |
| CDK2AP1  | 3 |
| CDK6     | 3 |
| CDRT4    | 3 |
| CDSN     | 3 |
| CELF3    | 3 |
| CELP     | 3 |
| CENPJ    | 3 |
| CEP76    | 3 |
| CHCHD2   | 3 |
| CIC      | 3 |
| CIRH1A   | 3 |
| CKM      | 3 |
| CKMT2    | 3 |
| CLCF1    | 3 |
| CLCN6    | 3 |
| CLEC18A  | 3 |
| CNIH2    | 3 |
| COG7     | 3 |
| COL6A2   | 3 |
| COPRS    | 3 |
| CORO1B   | 3 |
| COX14    | 3 |

|           |   |
|-----------|---|
| CPSF3     | 3 |
| CPZ       | 3 |
| CREB3     | 3 |
| CRMP1     | 3 |
| CTBP1-AS1 | 3 |
| CTNNB1    | 3 |
| CXXC5     | 3 |
| CYB5R2    | 3 |
| CYLD      | 3 |
| CYP26B1   | 3 |
| CYP2W1    | 3 |
| DCAF17    | 3 |
| DCLK2     | 3 |
| DCP2      | 3 |
| DDX3X     | 3 |
| DGKE      | 3 |
| DHRS4L2   | 3 |
| DIDO1     | 3 |
| DIP2C     | 3 |
| DKKL1     | 3 |
| DLG3      | 3 |
| DLG5      | 3 |
| DMPK      | 3 |
| DNMT3A    | 3 |
| DOC2GP    | 3 |
| DTYMK     | 3 |
| DUOX2     | 3 |
| DUX4L     | 3 |
| DYNC1I2   | 3 |
| DYNLL1    | 3 |
| EFCAB4B   | 3 |
| EFHC1     | 3 |
| EFNA2     | 3 |
| EIF3C     | 3 |
| ELANE     | 3 |
| EMX1      | 3 |
| ENKUR     | 3 |
| ENPP2     | 3 |
| EP400NL   | 3 |
| EPB41L1   | 3 |
| EPC1      | 3 |
| ERLEC1    | 3 |
| ESF1      | 3 |

|           |   |
|-----------|---|
| ESR2      | 3 |
| EXOC1     | 3 |
| F10       | 3 |
| FAM109A   | 3 |
| FAM13B    | 3 |
| FAM13C    | 3 |
| FAM159A   | 3 |
| FAM177A1  | 3 |
| FAM185A   | 3 |
| FAM19A5   | 3 |
| FAM49B    | 3 |
| FAM86EP   | 3 |
| FAM86FP   | 3 |
| FAM89B    | 3 |
| FANCC     | 3 |
| FASTKD1   | 3 |
| FASTKD2   | 3 |
| FBN3      | 3 |
| FBXL12    | 3 |
| FBXL4     | 3 |
| FGFR1OP2  | 3 |
| FGFR3     | 3 |
| FGFR4     | 3 |
| FKBP14    | 3 |
| FKBPL     | 3 |
| FKTN      | 3 |
| FLJ31485  | 3 |
| FNBP1L    | 3 |
| FRMD6     | 3 |
| FRMD6-AS1 | 3 |
| FUZ       | 3 |
| FXYD7     | 3 |
| FYN       | 3 |
| FZD4      | 3 |
| G6PD      | 3 |
| GADD45G   | 3 |
| GAMT      | 3 |
| GCFC1     | 3 |
| GEMIN7    | 3 |
| GFOD2     | 3 |
| GHR       | 3 |
| GJD2      | 3 |
| GLB1L2    | 3 |

|           |   |
|-----------|---|
| GLIPR1L2  | 3 |
| GLUD1     | 3 |
| GNA11     | 3 |
| GNAI2     | 3 |
| GNRH2     | 3 |
| GPR89A    | 3 |
| GRB7      | 3 |
| GRIN2B    | 3 |
| GSG1L     | 3 |
| GSTZ1     | 3 |
| HAP1      | 3 |
| HCFC1R1   | 3 |
| HES2      | 3 |
| HGFAC     | 3 |
| HIGD1B    | 3 |
| HLA-DQB1  | 3 |
| HMBOX1    | 3 |
| HMOX2     | 3 |
| HOTAIR    | 3 |
| HOXD8     | 3 |
| HPCAL1    | 3 |
| HSD17B4   | 3 |
| HSD3B7    | 3 |
| HYLS1     | 3 |
| IFRD1     | 3 |
| ILK       | 3 |
| ILKAP     | 3 |
| IMPAD1    | 3 |
| INTS6     | 3 |
| IRAK1     | 3 |
| IRF7      | 3 |
| ISOC2     | 3 |
| ITCH      | 3 |
| ITM2C     | 3 |
| ITPR1     | 3 |
| KCNIP1    | 3 |
| KCNJ14    | 3 |
| KCTD1     | 3 |
| KIAA1522  | 3 |
| KIAA1683  | 3 |
| KIDINS220 | 3 |
| KIF16B    | 3 |
| KIF9      | 3 |

|              |   |
|--------------|---|
| KLF12        | 3 |
| KLHL26       | 3 |
| KLHL35       | 3 |
| KLK11        | 3 |
| KLK12        | 3 |
| KLK5         | 3 |
| KPNA2        | 3 |
| KSR2         | 3 |
| LARP7        | 3 |
| LDB1         | 3 |
| LHX4         | 3 |
| LILRB1       | 3 |
| LILRB5       | 3 |
| LIMK1        | 3 |
| LIMS1        | 3 |
| LINC00467    | 3 |
| LINC00482    | 3 |
| LINC00521    | 3 |
| LLGL2        | 3 |
| LMNA         | 3 |
| LMX1B        | 3 |
| LOC100128292 | 3 |
| LOC100506368 | 3 |
| LOC255512    | 3 |
| LOC283731    | 3 |
| LOC284578    | 3 |
| LOC285696    | 3 |
| LOC338651    | 3 |
| LOC440894    | 3 |
| LOC643339    | 3 |
| LRCOL1       | 3 |
| LRRC4        | 3 |
| LRRC45       | 3 |
| LRRC49       | 3 |
| LRRFIP2      | 3 |
| LTA4H        | 3 |
| LY6H         | 3 |
| LY6K         | 3 |
| LYRM1        | 3 |
| LZTS2        | 3 |
| MAD2L2       | 3 |
| MAG          | 3 |
| MANEAL       | 3 |

|          |   |
|----------|---|
| MASTL    | 3 |
| MED6     | 3 |
| MEOX1    | 3 |
| METRNL   | 3 |
| METTL13  | 3 |
| MEX3A    | 3 |
| MGAT4B   | 3 |
| MID1     | 3 |
| MID1IP1  | 3 |
| MIR1181  | 3 |
| MIR1234  | 3 |
| MIR125B1 | 3 |
| MIR132   | 3 |
| MIR139   | 3 |
| MIR1469  | 3 |
| MIR1470  | 3 |
| MIR208B  | 3 |
| MIR3684  | 3 |
| MIR375   | 3 |
| MIR3908  | 3 |
| MIR4665  | 3 |
| MIR4752  | 3 |
| MIR4783  | 3 |
| MIR484   | 3 |
| MIR615   | 3 |
| MIR618   | 3 |
| MKI67IP  | 3 |
| MLC1     | 3 |
| MLF2     | 3 |
| MLL4     | 3 |
| MNX1     | 3 |
| MPC2     | 3 |
| MPDZ     | 3 |
| MRPL28   | 3 |
| MSI2     | 3 |
| MSL1     | 3 |
| MUC4     | 3 |
| MYCL1    | 3 |
| MYH10    | 3 |
| MYL12B   | 3 |
| MYLK-AS1 | 3 |
| MYRIP    | 3 |
| MZF1     | 3 |

|          |   |
|----------|---|
| NAB2     | 3 |
| NACC2    | 3 |
| NAE1     | 3 |
| NASP     | 3 |
| NAT9     | 3 |
| NAV2     | 3 |
| NBR1     | 3 |
| NCKAP1L  | 3 |
| NCR2     | 3 |
| NDE1     | 3 |
| NDUFC1   | 3 |
| NEAT1    | 3 |
| NEO1     | 3 |
| NFKBIB   | 3 |
| NGLY1    | 3 |
| NKAIN1   | 3 |
| NKAIN3   | 3 |
| NKX2-5   | 3 |
| NLGN3    | 3 |
| NOC2L    | 3 |
| NOL8     | 3 |
| NOP16    | 3 |
| NOS3     | 3 |
| NPC1     | 3 |
| NPR3     | 3 |
| NRD1     | 3 |
| NRG3     | 3 |
| NSUN2    | 3 |
| NT5C     | 3 |
| NTN1     | 3 |
| NTN3     | 3 |
| NTRK2    | 3 |
| OASL     | 3 |
| OBSL1    | 3 |
| OGFOD3   | 3 |
| OTUD5    | 3 |
| P2RY2    | 3 |
| PABPC4   | 3 |
| PACS2    | 3 |
| PAF1     | 3 |
| PAFAH1B3 | 3 |
| PANK1    | 3 |
| PANX2    | 3 |



|          |   |
|----------|---|
| PARVB    | 3 |
| PCDHGC5  | 3 |
| PCGF2    | 3 |
| PCGF3    | 3 |
| PDCD10   | 3 |
| PDHX     | 3 |
| PDIA2    | 3 |
| PDIK1L   | 3 |
| PDZK1    | 3 |
| PEMT     | 3 |
| PEX11A   | 3 |
| PEX26    | 3 |
| PGBD5    | 3 |
| PHKA1    | 3 |
| PHLDB1   | 3 |
| PIGO     | 3 |
| PIN1     | 3 |
| PKIG     | 3 |
| PLA2R1   | 3 |
| PLAG1    | 3 |
| PLEKHA8  | 3 |
| PLEKHG2  | 3 |
| PLIN3    | 3 |
| PMS2P4   | 3 |
| PMS2P5   | 3 |
| PNPLA4   | 3 |
| POFUT2   | 3 |
| POLR2F   | 3 |
| POLR3H   | 3 |
| POU5F1   | 3 |
| PPAPDC1B | 3 |
| PPP1R26  | 3 |
| PPP1R8   | 3 |
| PPP3CA   | 3 |
| PPP3CB   | 3 |
| PRAC     | 3 |
| PRDM6    | 3 |
| PRMT3    | 3 |
| PRPF6    | 3 |
| PRSS27   | 3 |
| PSD2     | 3 |
| PTGES2   | 3 |
| PTGIS    | 3 |

|             |   |
|-------------|---|
| PTPRD       | 3 |
| PXN         | 3 |
| RAB22A      | 3 |
| RAB28       | 3 |
| RAB37       | 3 |
| RAB4A       | 3 |
| RAB5C       | 3 |
| RABEPK      | 3 |
| RAI14       | 3 |
| RALGPS1     | 3 |
| RANBP3      | 3 |
| RANBP6      | 3 |
| RBBP6       | 3 |
| RBBP8       | 3 |
| RBFOX1      | 3 |
| RBP7        | 3 |
| RCSD1       | 3 |
| RFESD       | 3 |
| RGR         | 3 |
| RGS19       | 3 |
| RGS3        | 3 |
| RGS9BP      | 3 |
| RHOQ        | 3 |
| RIMS2       | 3 |
| RNF121      | 3 |
| RNF135      | 3 |
| RNF157      | 3 |
| RNF34       | 3 |
| RNF8        | 3 |
| RWDD1       | 3 |
| SEMA6C      | 3 |
| SENP2       | 3 |
| SEPT5-GP1BB | 3 |
| SESN1       | 3 |
| SESTD1      | 3 |
| SETMAR      | 3 |
| SFTPC       | 3 |
| SGK1        | 3 |
| SH3BP2      | 3 |
| SH3GL1      | 3 |
| SHC1        | 3 |
| SHOX2       | 3 |
| SIRPB1      | 3 |

|          |   |
|----------|---|
| SLAMF9   | 3 |
| SLC18A3  | 3 |
| SLC1A2   | 3 |
| SLC1A4   | 3 |
| SLC22A23 | 3 |
| SLC23A2  | 3 |
| SLC25A11 | 3 |
| SLC2A11  | 3 |
| SLC2A4RG | 3 |
| SLC30A8  | 3 |
| SLC34A3  | 3 |
| SLC6A15  | 3 |
| SLC6A8   | 3 |
| SLX4     | 3 |
| SMAD7    | 3 |
| SMIM1    | 3 |
| SMURF1   | 3 |
| SNAPC2   | 3 |
| SNHG8    | 3 |
| SNN      | 3 |
| SNX1     | 3 |
| SNX16    | 3 |
| SOD2     | 3 |
| SORCS2   | 3 |
| SOX18    | 3 |
| SPAG9    | 3 |
| SPRTN    | 3 |
| SPTAN1   | 3 |
| SRPK3    | 3 |
| SSBP3    | 3 |
| SSTR5    | 3 |
| STAR     | 3 |
| STARD3   | 3 |
| STEAP3   | 3 |
| STK24    | 3 |
| STRA13   | 3 |
| SUPT3H   | 3 |
| SURF1    | 3 |
| TAC3     | 3 |
| TAGLN3   | 3 |
| TALDO1   | 3 |
| TAOK2    | 3 |
| TAPBP    | 3 |

|           |   |
|-----------|---|
| TBR1      | 3 |
| TBX1      | 3 |
| TCF24     | 3 |
| TCL1A     | 3 |
| TEAD4     | 3 |
| TEKT4P2   | 3 |
| TENC1     | 3 |
| TINCR     | 3 |
| TMCO3     | 3 |
| TMEM177   | 3 |
| TMEM205   | 3 |
| TMEM216   | 3 |
| TMEM235   | 3 |
| TMEM63B   | 3 |
| TMEM87B   | 3 |
| TMPO      | 3 |
| TNFRSF18  | 3 |
| TNFRSF1B  | 3 |
| TNNC1     | 3 |
| TOB1-AS1  | 3 |
| TP53AIP1  | 3 |
| TRAPPC2   | 3 |
| TRAPPC5   | 3 |
| TRIM14    | 3 |
| TRMT2A    | 3 |
| TRPC5     | 3 |
| TRPM3     | 3 |
| TRPV6     | 3 |
| TSC1      | 3 |
| TSHZ2     | 3 |
| TSKU      | 3 |
| TUBB4B    | 3 |
| TUBGCP2   | 3 |
| TXNDC12   | 3 |
| UCKL1-AS1 | 3 |
| UGP2      | 3 |
| UNKL      | 3 |
| UPF2      | 3 |
| URB2      | 3 |
| USB1      | 3 |
| USP4      | 3 |
| VAV1      | 3 |
| VDAC2     | 3 |

|           |   |
|-----------|---|
| VGFB      | 3 |
| WBSCR28   | 3 |
| WDR44     | 3 |
| XKR7      | 3 |
| XRCC3     | 3 |
| XRRA1     | 3 |
| YAP1      | 3 |
| YEATS2    | 3 |
| YIPF5     | 3 |
| YME1L1    | 3 |
| ZBTB16    | 3 |
| ZCCHC10   | 3 |
| ZFPM2     | 3 |
| ZFY       | 3 |
| ZIC2      | 3 |
| ZMYND8    | 3 |
| ZNF160    | 3 |
| ZNF236    | 3 |
| ZNF267    | 3 |
| ZNF274    | 3 |
| ZNF28     | 3 |
| ZNF557    | 3 |
| ZNF580    | 3 |
| ZNF611    | 3 |
| ZSCAN2    | 3 |
| ZSWIM8    | 3 |
| 42067     | 2 |
| 42249     | 2 |
| 42251     | 2 |
| 42256     | 2 |
| AATK      | 2 |
| ABCF1     | 2 |
| ABHD15    | 2 |
| ABL1      | 2 |
| ACAN      | 2 |
| ACE       | 2 |
| ACOT7     | 2 |
| ACTB      | 2 |
| ACTN1-AS1 | 2 |
| ACVR2A    | 2 |
| ADAM11    | 2 |
| ADAMTSL4  | 2 |
| ADAT3     | 2 |

|            |   |
|------------|---|
| ADCK1      | 2 |
| ADCY5      | 2 |
| ADCYAP1    | 2 |
| ADPRHL2    | 2 |
| ADRA2B     | 2 |
| ADRA2C     | 2 |
| ADSL       | 2 |
| AFAP1      | 2 |
| AFG3L2     | 2 |
| AGAP2      | 2 |
| AGTPBP1    | 2 |
| AIFM2      | 2 |
| AIRE       | 2 |
| AKIRIN1    | 2 |
| ALDH18A1   | 2 |
| ALDH3A2    | 2 |
| ALG5       | 2 |
| ALKBH3     | 2 |
| AMDHD1     | 2 |
| AMIGO2     | 2 |
| AMMECR1    | 2 |
| AMOTL2     | 2 |
| AMPD2      | 2 |
| ANAPC2     | 2 |
| ANKRD17    | 2 |
| ANKRD63    | 2 |
| ANKRD9     | 2 |
| ANKZF1     | 2 |
| ANP32B     | 2 |
| AP2A1      | 2 |
| AP5M1      | 2 |
| AP5Z1      | 2 |
| APLP1      | 2 |
| APOBEC3F   | 2 |
| AQP10      | 2 |
| ARFGAP2    | 2 |
| ARHGDIG    | 2 |
| ARHGEF40   | 2 |
| ARHGEF9    | 2 |
| ARID1A     | 2 |
| ARID3B     | 2 |
| ARL2-SNX15 | 2 |
| ARMC5      | 2 |

|         |   |
|---------|---|
| ARMCX4  | 2 |
| ARPC5L  | 2 |
| ARRDC1  | 2 |
| ASAP2   | 2 |
| ASB7    | 2 |
| ASMTL   | 2 |
| ASPG    | 2 |
| ATAD2B  | 2 |
| ATAD3B  | 2 |
| ATP11A  | 2 |
| ATP2A2  | 2 |
| ATP2B3  | 2 |
| ATP5H   | 2 |
| ATP6AP1 | 2 |
| ATP6V0C | 2 |
| ATP8B2  | 2 |
| ATP9B   | 2 |
| ATPAF1  | 2 |
| ATXN10  | 2 |
| ATXN7L1 | 2 |
| ATXN7L3 | 2 |
| AURKB   | 2 |
| AXIN1   | 2 |
| B4GALT5 | 2 |
| BACH1   | 2 |
| BAG1    | 2 |
| BAHD1   | 2 |
| BANCR   | 2 |
| BARHL1  | 2 |
| BCL11B  | 2 |
| BCORP1  | 2 |
| BEND6   | 2 |
| BET1L   | 2 |
| BHLHB9  | 2 |
| BID     | 2 |
| BLMH    | 2 |
| BLVRB   | 2 |
| BMP1    | 2 |
| BMP2K   | 2 |
| BMPR1A  | 2 |
| BOLA2   | 2 |
| BOLA2B  | 2 |
| BRAF    | 2 |

|           |   |
|-----------|---|
| BRD3      | 2 |
| BRD4      | 2 |
| BRI3      | 2 |
| BROX      | 2 |
| BRWD1-IT2 | 2 |
| BTBD1     | 2 |
| BZW1      | 2 |
| C10orf105 | 2 |
| C10orf137 | 2 |
| C11orf21  | 2 |
| C11orf24  | 2 |
| C12orf57  | 2 |
| C15orf27  | 2 |
| C15orf48  | 2 |
| C15orf59  | 2 |
| C16orf92  | 2 |
| C17orf58  | 2 |
| C19orf60  | 2 |
| C1orf145  | 2 |
| C1orf159  | 2 |
| C1orf210  | 2 |
| C1orf51   | 2 |
| C1QC      | 2 |
| C1QTNF5   | 2 |
| C20orf141 | 2 |
| C21orf67  | 2 |
| C22orf23  | 2 |
| C22orf39  | 2 |
| C2CD2     | 2 |
| C3orf52   | 2 |
| C3orf58   | 2 |
| C3orf67   | 2 |
| C4orf29   | 2 |
| C4orf51   | 2 |
| C8orf47   | 2 |
| C9orf116  | 2 |
| C9orf174  | 2 |
| C9orf37   | 2 |
| C9orf69   | 2 |
| CA14      | 2 |
| CA2       | 2 |
| CA7       | 2 |
| CA9       | 2 |



|             |   |
|-------------|---|
| CABP7       | 2 |
| CACNA1G-AS1 | 2 |
| CACNA1I     | 2 |
| CACNB3      | 2 |
| CADM3       | 2 |
| CALCB       | 2 |
| CALCR       | 2 |
| CAMK1D      | 2 |
| CAMK2N2     | 2 |
| CAMSAP3     | 2 |
| CAP1        | 2 |
| CARD10      | 2 |
| CASD1       | 2 |
| CASKIN2     | 2 |
| CASP2       | 2 |
| CASZ1       | 2 |
| CAT         | 2 |
| CAV1        | 2 |
| CBFB        | 2 |
| CBLB        | 2 |
| CBLN1       | 2 |
| CBX7        | 2 |
| CCBL2       | 2 |
| CCDC121     | 2 |
| CCDC127     | 2 |
| CCDC138     | 2 |
| CCDC42      | 2 |
| CCDC64      | 2 |
| CCDC78      | 2 |
| CCNB2       | 2 |
| CCNK        | 2 |
| CCRL2       | 2 |
| CCSER1      | 2 |
| CD200       | 2 |
| CD200R1     | 2 |
| CD55        | 2 |
| CD79A       | 2 |
| CDAN1       | 2 |
| CDC23       | 2 |
| CDC37       | 2 |
| CDC42BPB    | 2 |
| CDC42EP1    | 2 |
| CDCA3       | 2 |

|            |   |
|------------|---|
| CDCA4      | 2 |
| CDCA5      | 2 |
| CDH24      | 2 |
| CDIPT      | 2 |
| CDK11A     | 2 |
| CDK16      | 2 |
| CDK17      | 2 |
| CDK8       | 2 |
| CDKL3      | 2 |
| CDKN2D     | 2 |
| CDKN3      | 2 |
| CDS2       | 2 |
| CDV3       | 2 |
| CDYL       | 2 |
| CEBPA-AS1  | 2 |
| CECR5      | 2 |
| CECR5-AS1  | 2 |
| CENPO      | 2 |
| CEPT1      | 2 |
| CERS4      | 2 |
| CERS6      | 2 |
| CFH        | 2 |
| CFL2       | 2 |
| CGN        | 2 |
| CHAC1      | 2 |
| CHD6       | 2 |
| CHKB       | 2 |
| CHKB-CPT1B | 2 |
| CHMP2A     | 2 |
| CHMP5      | 2 |
| CHPF       | 2 |
| CHRFAM7A   | 2 |
| CHST13     | 2 |
| CIDEA      | 2 |
| CIT        | 2 |
| CIZ1       | 2 |
| CKAP4      | 2 |
| CLCNKB     | 2 |
| CLDN15     | 2 |
| CLEC12B    | 2 |
| CLEC16A    | 2 |
| CLIC5      | 2 |
| CLN3       | 2 |

|         |   |
|---------|---|
| CLN6    | 2 |
| CMTM5   | 2 |
| CMTM8   | 2 |
| CNGB1   | 2 |
| CNN2    | 2 |
| CNPY2   | 2 |
| COA6    | 2 |
| COL16A1 | 2 |
| COL18A1 | 2 |
| COL23A1 | 2 |
| COL4A2  | 2 |
| COL4A6  | 2 |
| COL9A3  | 2 |
| COMMD6  | 2 |
| CPNE7   | 2 |
| CPPED1  | 2 |
| CPSF4L  | 2 |
| CPXCR1  | 2 |
| CRAT    | 2 |
| CRB2    | 2 |
| CREB5   | 2 |
| CRELD2  | 2 |
| CRTC1   | 2 |
| CRYBB1  | 2 |
| CRYGN   | 2 |
| CSNK1E  | 2 |
| CSNK2A2 | 2 |
| CT45A5  | 2 |
| CTAGE7P | 2 |
| CTC1    | 2 |
| CTDNEP1 | 2 |
| CTNNA2  | 2 |
| CTNNBL1 | 2 |
| CTSL3   | 2 |
| CTU2    | 2 |
| CTXN3   | 2 |
| CUEDC1  | 2 |
| CUZD1   | 2 |
| CXCR4   | 2 |
| CXXC11  | 2 |
| CYHR1   | 2 |
| CYP21A2 | 2 |
| CYP24A1 | 2 |

|             |   |
|-------------|---|
| CYP2F1      | 2 |
| DALRD3      | 2 |
| DCDC2       | 2 |
| DCSTAMP     | 2 |
| DCTD        | 2 |
| DCTN1       | 2 |
| DCUN1D4     | 2 |
| DDR2        | 2 |
| DDRGK1      | 2 |
| DDX31       | 2 |
| DDX47       | 2 |
| DDX51       | 2 |
| DDX54       | 2 |
| DEGS2       | 2 |
| DEK         | 2 |
| DENND1A     | 2 |
| DENND3      | 2 |
| DENND5B-AS1 | 2 |
| DEPTOR      | 2 |
| DES         | 2 |
| DGCR5       | 2 |
| DGCR8       | 2 |
| DGKK        | 2 |
| DHCR7       | 2 |
| DHRS3       | 2 |
| DIAPH1      | 2 |
| DISP2       | 2 |
| DLC1        | 2 |
| DLG1-AS1    | 2 |
| DLL1        | 2 |
| DLL3        | 2 |
| DLX3        | 2 |
| DLX4        | 2 |
| DMP1        | 2 |
| DNAJB12     | 2 |
| DNAJC4      | 2 |
| DNM1P46     | 2 |
| DOCK6       | 2 |
| DPP7        | 2 |
| DPYD        | 2 |
| DSEL        | 2 |
| DSP         | 2 |
| DUSP5       | 2 |

|             |   |
|-------------|---|
| DVL1        | 2 |
| E2F1        | 2 |
| E2F7        | 2 |
| EBF1        | 2 |
| EBF3        | 2 |
| EBF4        | 2 |
| EDC4        | 2 |
| EDNRB       | 2 |
| EEA1        | 2 |
| EEFSEC      | 2 |
| EFCAB14     | 2 |
| EFCAB14-AS1 | 2 |
| EFEMP2      | 2 |
| EFNA1       | 2 |
| EHBP1L1     | 2 |
| EIF2C3      | 2 |
| EIF3L       | 2 |
| EIF4G3      | 2 |
| ELAVL4      | 2 |
| ELF4        | 2 |
| EMC8        | 2 |
| EME1        | 2 |
| EMID1       | 2 |
| EML1        | 2 |
| EMR2        | 2 |
| EMX2        | 2 |
| ENTPD2      | 2 |
| ENTPD3      | 2 |
| EPB42       | 2 |
| EPC2        | 2 |
| EPHA6       | 2 |
| EPHB2       | 2 |
| EPOR        | 2 |
| EPX         | 2 |
| ERBB4       | 2 |
| ERI2        | 2 |
| ERICH1-AS1  | 2 |
| ETFDH       | 2 |
| ETHE1       | 2 |
| ETNK2       | 2 |
| EVC2        | 2 |
| EXOC2       | 2 |
| EXOC3L1     | 2 |

|             |   |
|-------------|---|
| EXOC3L2     | 2 |
| EXOC6       | 2 |
| EXOSC10     | 2 |
| EZR         | 2 |
| F2RL3       | 2 |
| F8A1        | 2 |
| F8A2        | 2 |
| F8A3        | 2 |
| FABP5P3     | 2 |
| FAM120A     | 2 |
| FAM160A2    | 2 |
| FAM166B     | 2 |
| FAM181A     | 2 |
| FAM19A3     | 2 |
| FAM20C      | 2 |
| FAM211A     | 2 |
| FAM221B     | 2 |
| FAM222A-AS1 | 2 |
| FAM46C      | 2 |
| FAM53A      | 2 |
| FAM53C      | 2 |
| FAM57B      | 2 |
| FAM69C      | 2 |
| FAM78B      | 2 |
| FAM83B      | 2 |
| FAM86B1     | 2 |
| FAM98B      | 2 |
| FANCM       | 2 |
| FARP1       | 2 |
| FARP2       | 2 |
| FARS2       | 2 |
| FARSB       | 2 |
| FBLN2       | 2 |
| FBN2        | 2 |
| FBP1        | 2 |
| FBXL13      | 2 |
| FBXL19      | 2 |
| FBXL2       | 2 |
| FBXL20      | 2 |
| FBXO11      | 2 |
| FBXO21      | 2 |
| FBXO9       | 2 |
| FCHSD1      | 2 |

|            |   |
|------------|---|
| FCN2       | 2 |
| FDX1L      | 2 |
| FDXACB1    | 2 |
| FEZF1      | 2 |
| FGF12      | 2 |
| FGFR1OP    | 2 |
| FHOD3      | 2 |
| FIS1       | 2 |
| FKBP10     | 2 |
| FKBP1A     | 2 |
| FKBP1B     | 2 |
| FKBP6      | 2 |
| FKRP       | 2 |
| FLJ14107   | 2 |
| FLJ27354   | 2 |
| FLJ31306   | 2 |
| FLJ39051   | 2 |
| FLJ43663   | 2 |
| FLJ43879   | 2 |
| FLVCR1-AS1 | 2 |
| FMO3       | 2 |
| FNIP1      | 2 |
| FOXA2      | 2 |
| FOXF1-AS1  | 2 |
| FOXO3      | 2 |
| FOXRED2    | 2 |
| FRMD3      | 2 |
| FST        | 2 |
| FUOM       | 2 |
| FUT7       | 2 |
| FUT9       | 2 |
| FXYD1      | 2 |
| FXYD2      | 2 |
| G3BP1      | 2 |
| GAB1       | 2 |
| GAB4       | 2 |
| GABRA4     | 2 |
| GAD1       | 2 |
| GAD2       | 2 |
| GALNTL1    | 2 |
| GALP       | 2 |
| GALT       | 2 |
| GAR1       | 2 |

|           |   |
|-----------|---|
| GART      | 2 |
| GAS6-AS1  | 2 |
| GATA3-AS1 | 2 |
| GBA3      | 2 |
| GBAS      | 2 |
| GCOM1     | 2 |
| GDF11     | 2 |
| GEMIN5    | 2 |
| GEN1      | 2 |
| GFOD1     | 2 |
| GGT6      | 2 |
| GIT1      | 2 |
| GJA3      | 2 |
| GJB3      | 2 |
| GLRX2     | 2 |
| GLS       | 2 |
| GNA15     | 2 |
| GNAO1     | 2 |
| GNAS      | 2 |
| GNAS-AS1  | 2 |
| GNG7      | 2 |
| GNG8      | 2 |
| GNRHR     | 2 |
| GOLGA3    | 2 |
| GOLGA8B   | 2 |
| GOLGA8T   | 2 |
| GOPC      | 2 |
| GP1BB     | 2 |
| GPD1      | 2 |
| GPR173    | 2 |
| GPR18     | 2 |
| GPR182    | 2 |
| GPR37     | 2 |
| GPR6      | 2 |
| GPR78     | 2 |
| GPRC5C    | 2 |
| GPRIN1    | 2 |
| GPSM2     | 2 |
| GPSM3     | 2 |
| GRAMD1A   | 2 |
| GRAMD4    | 2 |
| GRASP     | 2 |
| GRIA3     | 2 |



|           |   |
|-----------|---|
| GRIN3B    | 2 |
| GRK6      | 2 |
| GRM1      | 2 |
| GRM2      | 2 |
| GRN       | 2 |
| GTF3C2    | 2 |
| GYLTL1B   | 2 |
| GYPE      | 2 |
| HAO2      | 2 |
| HAUS6     | 2 |
| HAUS8     | 2 |
| HBA1      | 2 |
| HBA2      | 2 |
| HCFC1     | 2 |
| HCG11     | 2 |
| HCN2      | 2 |
| HDAC3     | 2 |
| HEBP1     | 2 |
| HECTD3    | 2 |
| HELZ      | 2 |
| HES4      | 2 |
| HEY1      | 2 |
| HIC1      | 2 |
| HIC2      | 2 |
| HIP1      | 2 |
| HIP1R     | 2 |
| HIPK2     | 2 |
| HIST2H2BC | 2 |
| HMGA2     | 2 |
| HMHA1     | 2 |
| HNF1B     | 2 |
| HNRNPH1   | 2 |
| HNRNPH3   | 2 |
| HOGA1     | 2 |
| HOMER3    | 2 |
| HOOK1     | 2 |
| HORMAD1   | 2 |
| HOTAIRM1  | 2 |
| HOXC11    | 2 |
| HOXC13    | 2 |
| HOXC8     | 2 |
| HOXD3     | 2 |
| HR        | 2 |

|                |   |
|----------------|---|
| HS6ST1         | 2 |
| HSF1           | 2 |
| HSPA8          | 2 |
| HSPB1          | 2 |
| HSPB2-C11orf52 | 2 |
| HTATSF1        | 2 |
| HYAL2          | 2 |
| ICOSLG         | 2 |
| ID2            | 2 |
| IDH1-AS1       | 2 |
| IFI27          | 2 |
| IFT140         | 2 |
| IFT88          | 2 |
| IGF2           | 2 |
| IGF2-AS        | 2 |
| IGF2BP2        | 2 |
| IGF2BP3        | 2 |
| IGFALS         | 2 |
| IGFBP7         | 2 |
| IGFN1          | 2 |
| IL11           | 2 |
| IL13RA1        | 2 |
| IL1RAPL1       | 2 |
| IL20RB         | 2 |
| ILDR2          | 2 |
| ING2           | 2 |
| INHA           | 2 |
| INHBB          | 2 |
| INSR           | 2 |
| INTS12         | 2 |
| IP6K3          | 2 |
| IQCF3          | 2 |
| IQSEC3         | 2 |
| IRAK3          | 2 |
| IRS2           | 2 |
| ISLR2          | 2 |
| ISM1           | 2 |
| ISM2           | 2 |
| ITGA7          | 2 |
| ITGB3          | 2 |
| ITGB5          | 2 |
| ITPKC          | 2 |
| ITPRIPL2       | 2 |

|            |   |
|------------|---|
| JAG2       | 2 |
| JMJD4      | 2 |
| JRKL       | 2 |
| JUN        | 2 |
| KANK1      | 2 |
| KANK2      | 2 |
| KAT8       | 2 |
| KAZN       | 2 |
| KCNB2      | 2 |
| KCNC1      | 2 |
| KCNH3      | 2 |
| KCNH4      | 2 |
| KCNJ15     | 2 |
| KCNK10     | 2 |
| KCNK2      | 2 |
| KCNK3      | 2 |
| KCNK4      | 2 |
| KCNMB3     | 2 |
| KCNN3      | 2 |
| KCNQ1      | 2 |
| KCNT1      | 2 |
| KDELR3     | 2 |
| KDM5A      | 2 |
| KIAA0125   | 2 |
| KIAA0232   | 2 |
| KIAA1614   | 2 |
| KIAA1656   | 2 |
| KIF17      | 2 |
| KIN        | 2 |
| KIRREL3    | 2 |
| KIT        | 2 |
| KLC3       | 2 |
| KLF7       | 2 |
| KLHDC5     | 2 |
| KLHL13     | 2 |
| KLHL22     | 2 |
| KLHL25     | 2 |
| KLHL28     | 2 |
| KLHL29     | 2 |
| KLK4       | 2 |
| KRT80      | 2 |
| KRTAP10-12 | 2 |
| KRTAP10-4  | 2 |

|              |   |
|--------------|---|
| KRTAP10-9    | 2 |
| L3MBTL3      | 2 |
| LARS2        | 2 |
| LBX1         | 2 |
| LEMD3        | 2 |
| LEPREL1      | 2 |
| LGALS12      | 2 |
| LGALS14      | 2 |
| LGALS3       | 2 |
| LHX2         | 2 |
| LIG1         | 2 |
| LIG3         | 2 |
| LIG4         | 2 |
| LIMD1-AS1    | 2 |
| LINC00115    | 2 |
| LINC00173    | 2 |
| LINC00310    | 2 |
| LINC00339    | 2 |
| LINC00617    | 2 |
| LMBR1        | 2 |
| LMNB1        | 2 |
| LOC100128338 | 2 |
| LOC100129520 | 2 |
| LOC100129858 | 2 |
| LOC100129917 | 2 |
| LOC100130264 | 2 |
| LOC100130700 | 2 |
| LOC100130776 | 2 |
| LOC100130899 | 2 |
| LOC100130954 | 2 |
| LOC100133957 | 2 |
| LOC100233156 | 2 |
| LOC100240735 | 2 |
| LOC100294145 | 2 |
| LOC100498859 | 2 |
| LOC100505806 | 2 |
| LOC100505835 | 2 |
| LOC100506394 | 2 |
| LOC100506451 | 2 |
| LOC100506714 | 2 |
| LOC100506874 | 2 |
| LOC100506990 | 2 |
| LOC100507433 | 2 |

|              |   |
|--------------|---|
| LOC100507634 | 2 |
| LOC150381    | 2 |
| LOC150776    | 2 |
| LOC151174    | 2 |
| LOC154761    | 2 |
| LOC200772    | 2 |
| LOC254100    | 2 |
| LOC283440    | 2 |
| LOC283692    | 2 |
| LOC285484    | 2 |
| LOC286083    | 2 |
| LOC338758    | 2 |
| LOC339975    | 2 |
| LOC344595    | 2 |
| LOC389247    | 2 |
| LOC400620    | 2 |
| LOC401397    | 2 |
| LOC440434    | 2 |
| LOC440461    | 2 |
| LOC440895    | 2 |
| LOC441461    | 2 |
| LOC643201    | 2 |
| LOC643355    | 2 |
| LOC643669    | 2 |
| LOC646862    | 2 |
| LOC650368    | 2 |
| LOC90246     | 2 |
| LOC90834     | 2 |
| LOC91450     | 2 |
| LOXL1-AS1    | 2 |
| LPCAT1       | 2 |
| LPIN1        | 2 |
| LPP          | 2 |
| LRRC10B      | 2 |
| LRRC14       | 2 |
| LRRC29       | 2 |
| LRRC73       | 2 |
| LRRC8D       | 2 |
| LRRN2        | 2 |
| LSM4         | 2 |
| LSP1         | 2 |
| LTB          | 2 |
| LTBR         | 2 |

|            |   |
|------------|---|
| LYSMD1     | 2 |
| LZTS1-AS1  | 2 |
| MAFG       | 2 |
| MAGEA10-MA | 2 |
| MAGEA6     | 2 |
| MAGEB16    | 2 |
| MAGED2     | 2 |
| MAGI2      | 2 |
| MAGI3      | 2 |
| MALT1      | 2 |
| MAP1A      | 2 |
| MAPK12     | 2 |
| MAPKAPK2   | 2 |
| MARCO      | 2 |
| MATK       | 2 |
| MAZ        | 2 |
| MBD2       | 2 |
| MCM8       | 2 |
| MDGA2      | 2 |
| MDH1       | 2 |
| MEF2C      | 2 |
| MESTIT1    | 2 |
| METTL17    | 2 |
| MEX3D      | 2 |
| MFRP       | 2 |
| MFSD6      | 2 |
| MICAL1     | 2 |
| MIR10B     | 2 |
| MIR1180    | 2 |
| MIR1225    | 2 |
| MIR1276    | 2 |
| MIR129-2   | 2 |
| MIR130B    | 2 |
| MIR145     | 2 |
| MIR148A    | 2 |
| MIR153-1   | 2 |
| MIR191     | 2 |
| MIR202     | 2 |
| MIR208A    | 2 |
| MIR22      | 2 |
| MIR301B    | 2 |
| MIR3191    | 2 |
| MIR3197    | 2 |

|             |   |
|-------------|---|
| MIR34B      | 2 |
| MIR34C      | 2 |
| MIR3613     | 2 |
| MIR378D2    | 2 |
| MIR3918     | 2 |
| MIR425      | 2 |
| MIR4323     | 2 |
| MIR4326     | 2 |
| MIR4492     | 2 |
| MIR4500HG   | 2 |
| MIR4641     | 2 |
| MIR4663     | 2 |
| MIR4690     | 2 |
| MIR4734     | 2 |
| MIR4746     | 2 |
| MIR4999     | 2 |
| MIR5090     | 2 |
| MIR5188     | 2 |
| MIR5193     | 2 |
| MIR671      | 2 |
| MLL3        | 2 |
| MLLT4-AS1   | 2 |
| MOK         | 2 |
| MORF4L2-AS1 | 2 |
| MPG         | 2 |
| MPND        | 2 |
| MRGPRF      | 2 |
| MRGPRG-AS1  | 2 |
| MRI1        | 2 |
| MROH6       | 2 |
| MRPL2       | 2 |
| MRPS14      | 2 |
| MRPS18A     | 2 |
| MRPS26      | 2 |
| MRPS34      | 2 |
| MST1P2      | 2 |
| MSX1        | 2 |
| MT1H        | 2 |
| MTFR1L      | 2 |
| MTHFR       | 2 |
| MTRNR2L1    | 2 |
| MTRNR2L10   | 2 |
| MVB12B      | 2 |

|         |   |
|---------|---|
| MXD3    | 2 |
| MYBBP1A | 2 |
| MYBL2   | 2 |
| MYCBPAP | 2 |
| MYL3    | 2 |
| MYL6B   | 2 |
| MYL9    | 2 |
| MYZAP   | 2 |
| MZT1    | 2 |
| N4BP2L1 | 2 |
| NAAA    | 2 |
| NARF    | 2 |
| NARG2   | 2 |
| NAT14   | 2 |
| NAT8L   | 2 |
| NAV1    | 2 |
| NCOA6   | 2 |
| NDST2   | 2 |
| NDUFB11 | 2 |
| NDUFS2  | 2 |
| NDUFS6  | 2 |
| NECAB2  | 2 |
| NEFM    | 2 |
| NEK4    | 2 |
| NEK6    | 2 |
| NETO1   | 2 |
| NEURL4  | 2 |
| NEUROD2 | 2 |
| NEUROG3 | 2 |
| NEXN    | 2 |
| NFE2L3  | 2 |
| NHP2L1  | 2 |
| NID1    | 2 |
| NIF3L1  | 2 |
| NKD1    | 2 |
| NKX2-1  | 2 |
| NKX2-2  | 2 |
| NMB     | 2 |
| NME3    | 2 |
| NMNAT3  | 2 |
| NOG     | 2 |
| NOV     | 2 |
| NOVA2   | 2 |



|             |   |
|-------------|---|
| NPHP3       | 2 |
| NPHP3-ACAD1 | 2 |
| NPM2        | 2 |
| NPY2R       | 2 |
| NR4A1       | 2 |
| NR4A2       | 2 |
| NSD1        | 2 |
| NSG1        | 2 |
| NT5C2       | 2 |
| NT5C3       | 2 |
| NUCKS1      | 2 |
| NUDT14      | 2 |
| NUDT16L1    | 2 |
| NUP153      | 2 |
| NUP93       | 2 |
| NXF5        | 2 |
| NXPH2       | 2 |
| OCIAD2      | 2 |
| ODF3B       | 2 |
| OLFML2B     | 2 |
| OLIG1       | 2 |
| OMP         | 2 |
| ONECUT1     | 2 |
| OPRK1       | 2 |
| OR51B5      | 2 |
| OSBPL10     | 2 |
| OTUB1       | 2 |
| OTUD6B      | 2 |
| OTX1        | 2 |
| OVCA2       | 2 |
| OVOL1       | 2 |
| P2RX1       | 2 |
| P2RX6       | 2 |
| P2RY6       | 2 |
| P4HA2       | 2 |
| P4HTM       | 2 |
| PAK3        | 2 |
| PALM        | 2 |
| PAPD7       | 2 |
| PAQR6       | 2 |
| PARP3       | 2 |
| PAX1        | 2 |
| PAXIP1      | 2 |

|         |   |
|---------|---|
| PCBP1   | 2 |
| PCBP4   | 2 |
| PCDH10  | 2 |
| PCGF1   | 2 |
| PCGF5   | 2 |
| PCNA    | 2 |
| PCP4L1  | 2 |
| PCTP    | 2 |
| PDE10A  | 2 |
| PDE1C   | 2 |
| PDIA5   | 2 |
| PDXDC2P | 2 |
| PDXK    | 2 |
| PEAR1   | 2 |
| PER1    | 2 |
| PER3    | 2 |
| PET100  | 2 |
| PEX11G  | 2 |
| PFDN5   | 2 |
| PFN1    | 2 |
| PGC     | 2 |
| PGM1    | 2 |
| PHACTR2 | 2 |
| PHF15   | 2 |
| PHF21A  | 2 |
| PHF7    | 2 |
| PHTF2   | 2 |
| PHYHD1  | 2 |
| PHYHIP  | 2 |
| PI4KA   | 2 |
| PI4KAP2 | 2 |
| PIAS2   | 2 |
| PIDD    | 2 |
| PIFO    | 2 |
| PIGC    | 2 |
| PIGN    | 2 |
| PIH1D2  | 2 |
| PIK3R1  | 2 |
| PIK3R2  | 2 |
| PILRB   | 2 |
| PITPNC1 | 2 |
| PKD1    | 2 |
| PKDCC   | 2 |

|             |   |
|-------------|---|
| PLA2G2F     | 2 |
| PLAC8L1     | 2 |
| PLAGL1      | 2 |
| PLCB3       | 2 |
| PLCD3       | 2 |
| PLCG1       | 2 |
| PLD2        | 2 |
| PLEKHA4     | 2 |
| PLEKHA8P1   | 2 |
| PLEKHB1     | 2 |
| PLEKHG6     | 2 |
| PLEKHH1     | 2 |
| PLEKHN1     | 2 |
| PLEKHO2     | 2 |
| PLSCR3      | 2 |
| PLXDC1      | 2 |
| PLXNB3      | 2 |
| PMS2        | 2 |
| PNKD        | 2 |
| PNMT        | 2 |
| PNPLA3      | 2 |
| PNPLA5      | 2 |
| PNPO        | 2 |
| POC1B       | 2 |
| PODNL1      | 2 |
| POGLUT1     | 2 |
| POLB        | 2 |
| POLR2A      | 2 |
| POLR2I      | 2 |
| POMC        | 2 |
| POTEG       | 2 |
| POU3F3      | 2 |
| PPAN-P2RY11 | 2 |
| PPAP2A      | 2 |
| PPP1CC      | 2 |
| PPP1R32     | 2 |
| PPP1R37     | 2 |
| PPP2R3B     | 2 |
| PPP5D1      | 2 |
| PRDM1       | 2 |
| PRDM16      | 2 |
| PRELID1     | 2 |
| PRF1        | 2 |

|             |   |
|-------------|---|
| PRG2        | 2 |
| PRIM1       | 2 |
| PRKAA1      | 2 |
| PRKAA2      | 2 |
| PRMT8       | 2 |
| PROK2       | 2 |
| PRPF4       | 2 |
| PRPF40A     | 2 |
| PRPS2       | 2 |
| PRPSAP2     | 2 |
| PRR5-ARHGAP | 2 |
| PRR7        | 2 |
| PRRT1       | 2 |
| PRSS35      | 2 |
| PSAT1       | 2 |
| PSEN1       | 2 |
| PSMB2       | 2 |
| PSMC3       | 2 |
| PSME4       | 2 |
| PSMG3       | 2 |
| PTAFR       | 2 |
| PTCH2       | 2 |
| PTCHD4      | 2 |
| PTHLH       | 2 |
| PTPRE       | 2 |
| PTPRJ       | 2 |
| PUSL1       | 2 |
| PXDN        | 2 |
| PYGB        | 2 |
| R3HDM4      | 2 |
| RAB11B      | 2 |
| RAB11B-AS1  | 2 |
| RAB35       | 2 |
| RAB40B      | 2 |
| RAB8A       | 2 |
| RABEP1      | 2 |
| RALGDS      | 2 |
| RAMP2-AS1   | 2 |
| RAMP3       | 2 |
| RAP1A       | 2 |
| RAPGEF4     | 2 |
| RARB        | 2 |
| RASA1       | 2 |

|          |   |
|----------|---|
| RBM38    | 2 |
| RBM6     | 2 |
| RBMXL1   | 2 |
| RC3H2    | 2 |
| RCC2     | 2 |
| RD3      | 2 |
| REEP6    | 2 |
| REL      | 2 |
| RELT     | 2 |
| REST     | 2 |
| REV1     | 2 |
| RFPL2    | 2 |
| RFX2     | 2 |
| RFX5     | 2 |
| RFX6     | 2 |
| RGL3     | 2 |
| RGN      | 2 |
| RGPD6    | 2 |
| RGS20    | 2 |
| RHBDF2   | 2 |
| RHCG     | 2 |
| RHD      | 2 |
| RHOBTB1  | 2 |
| RHOBTB2  | 2 |
| RHOD     | 2 |
| RHOG     | 2 |
| RHOXF2   | 2 |
| RHOXF2B  | 2 |
| RIOK2    | 2 |
| RM11     | 2 |
| RMND1    | 2 |
| RNF138P1 | 2 |
| RNF152   | 2 |
| RNF19B   | 2 |
| RNF216   | 2 |
| RNF39    | 2 |
| RNPEPL1  | 2 |
| RNPS1    | 2 |
| ROBO2    | 2 |
| ROCK2    | 2 |
| ROM1     | 2 |
| RORC     | 2 |
| RPE      | 2 |

|          |   |
|----------|---|
| RPH3A    | 2 |
| RPL8     | 2 |
| RPL9     | 2 |
| RPRD1A   | 2 |
| RPS29    | 2 |
| RPS6KA4  | 2 |
| RPS6KC1  | 2 |
| RPSA     | 2 |
| RPUSD4   | 2 |
| RRAGD    | 2 |
| RRBP1    | 2 |
| RRP8     | 2 |
| RSPO3    | 2 |
| RTFDC1   | 2 |
| RTN4RL2  | 2 |
| RUNX1T1  | 2 |
| RXRA     | 2 |
| RXRB     | 2 |
| S100A4   | 2 |
| SAC3D1   | 2 |
| SAMD1    | 2 |
| SAMD10   | 2 |
| SAMD4B   | 2 |
| SATB1    | 2 |
| SCAMP4   | 2 |
| SCARB1   | 2 |
| SCARF2   | 2 |
| SCGB1B2P | 2 |
| SCN11A   | 2 |
| SCN4B    | 2 |
| SCRT1    | 2 |
| SCUBE2   | 2 |
| SDHAF2   | 2 |
| SELRC1   | 2 |
| SELT     | 2 |
| SEMA4C   | 2 |
| SEMA4D   | 2 |
| SEMA5B   | 2 |
| SERF2    | 2 |
| SERINC4  | 2 |
| SERPINB6 | 2 |
| SERPING1 | 2 |
| SERTAD2  | 2 |

|          |   |
|----------|---|
| SETD2    | 2 |
| SETD3    | 2 |
| SFRP1    | 2 |
| SGSM2    | 2 |
| SH2D2A   | 2 |
| SH3BP4   | 2 |
| SH3GLB2  | 2 |
| SHARPIN  | 2 |
| SHD      | 2 |
| SHISA4   | 2 |
| SHISA7   | 2 |
| SHROOM2  | 2 |
| SIAH2    | 2 |
| SIGLEC7  | 2 |
| SIGLEC9  | 2 |
| SIGMAR1  | 2 |
| SKA1     | 2 |
| SKA3     | 2 |
| SKIDA1   | 2 |
| SLC16A1  | 2 |
| SLC16A2  | 2 |
| SLC16A8  | 2 |
| SLC1A5   | 2 |
| SLC22A20 | 2 |
| SLC24A2  | 2 |
| SLC25A14 | 2 |
| SLC25A29 | 2 |
| SLC25A30 | 2 |
| SLC25A36 | 2 |
| SLC25A39 | 2 |
| SLC28A3  | 2 |
| SLC30A1  | 2 |
| SLC33A1  | 2 |
| SLC35F6  | 2 |
| SLC36A4  | 2 |
| SLC38A1  | 2 |
| SLC39A12 | 2 |
| SLC39A13 | 2 |
| SLC39A7  | 2 |
| SLC41A1  | 2 |
| SLC46A3  | 2 |
| SLC6A4   | 2 |
| SLC7A10  | 2 |

|            |   |
|------------|---|
| SLCO1A2    | 2 |
| SLCO2A1    | 2 |
| SLFNL1     | 2 |
| SLITRK5    | 2 |
| SLMO1      | 2 |
| SMAD6      | 2 |
| SMARCAL1   | 2 |
| SMOC1      | 2 |
| SMPD1      | 2 |
| SMTN       | 2 |
| SMURF2     | 2 |
| SNHG1      | 2 |
| SNORA70    | 2 |
| SNORD115-3 | 2 |
| SNORD116-6 | 2 |
| SNORD23    | 2 |
| SNORD25    | 2 |
| SNORD26    | 2 |
| SNORD27    | 2 |
| SNORD28    | 2 |
| SNRK       | 2 |
| SNTA1      | 2 |
| SOCS6      | 2 |
| SORD       | 2 |
| SOS1       | 2 |
| SOST       | 2 |
| SOX1       | 2 |
| SOX10      | 2 |
| SOX15      | 2 |
| SP9        | 2 |
| SPATA2L    | 2 |
| SPATA31A1  | 2 |
| SPATA31A2  | 2 |
| SPATA31A3  | 2 |
| SPATA31A4  | 2 |
| SPATA31A5  | 2 |
| SPATA31A6  | 2 |
| SPATA31A7  | 2 |
| SPATC1     | 2 |
| SPATC1L    | 2 |
| SPEG       | 2 |
| SPESP1     | 2 |
| SPN        | 2 |



|           |   |
|-----------|---|
| SPO11     | 2 |
| SPRED3    | 2 |
| SPTLC1    | 2 |
| SRC       | 2 |
| SRCAP     | 2 |
| SRCIN1    | 2 |
| SREBF1    | 2 |
| SSFA2     | 2 |
| SSTR5-AS1 | 2 |
| ST3GAL1   | 2 |
| ST3GAL2   | 2 |
| ST3GAL4   | 2 |
| ST3GAL6   | 2 |
| ST8SIA4   | 2 |
| STAG3L4   | 2 |
| STK19     | 2 |
| STK32A    | 2 |
| STK36     | 2 |
| STON1     | 2 |
| STRADB    | 2 |
| STUB1     | 2 |
| SUCLG2    | 2 |
| SUSD4     | 2 |
| SUV420H1  | 2 |
| SUZ12P1   | 2 |
| SYMPK     | 2 |
| SYNDIG1L  | 2 |
| SYNGAP1   | 2 |
| SYNM      | 2 |
| SYT1      | 2 |
| SYT2      | 2 |
| T         | 2 |
| TACC2     | 2 |
| TAF4      | 2 |
| TANC1     | 2 |
| TAOK1     | 2 |
| TAPT1-AS1 | 2 |
| TARDBP    | 2 |
| TAX1BP3   | 2 |
| TBC1D1    | 2 |
| TBC1D10B  | 2 |
| TBC1D10C  | 2 |
| TBC1D9B   | 2 |

|                |   |
|----------------|---|
| TBCC           | 2 |
| TBCE           | 2 |
| TBPL1          | 2 |
| TBXAS1         | 2 |
| TCEB2          | 2 |
| TCN2           | 2 |
| TCTEX1D4       | 2 |
| TDRG1          | 2 |
| TECPR2         | 2 |
| TERT           | 2 |
| TEX261         | 2 |
| TFB1M          | 2 |
| TFDP1          | 2 |
| TGFA           | 2 |
| TGFBRAP1       | 2 |
| TGIF2          | 2 |
| TGIF2-C20orf24 | 2 |
| THAP5          | 2 |
| THBS2          | 2 |
| THY1           | 2 |
| TIAL1          | 2 |
| TIGD5          | 2 |
| TIMM10B        | 2 |
| TINAGL1        | 2 |
| TIRAP          | 2 |
| TISP43         | 2 |
| TM2D3          | 2 |
| TM4SF1         | 2 |
| TM4SF18        | 2 |
| TMCC2          | 2 |
| TMEM127        | 2 |
| TMEM129        | 2 |
| TMEM161A       | 2 |
| TMEM201        | 2 |
| TMEM37         | 2 |
| TMEM50B        | 2 |
| TMEM51         | 2 |
| TMEM55A        | 2 |
| TMEM64         | 2 |
| TMEM66         | 2 |
| TMEM72-AS1     | 2 |
| TMEM74         | 2 |
| TMEM88         | 2 |

|           |   |
|-----------|---|
| TMOD2     | 2 |
| TMPRSS5   | 2 |
| TNFAIP8L1 | 2 |
| TNFRSF4   | 2 |
| TNK2      | 2 |
| TOP1MT    | 2 |
| TP53TG3   | 2 |
| TP53TG3B  | 2 |
| TP53TG3C  | 2 |
| TPCN1     | 2 |
| TPPP      | 2 |
| TPSD1     | 2 |
| TRAPPC10  | 2 |
| TRIM39    | 2 |
| TRIM4     | 2 |
| TRIM45    | 2 |
| TRIM46    | 2 |
| TRIM54    | 2 |
| TRIM71    | 2 |
| TRIM8     | 2 |
| TRIP13    | 2 |
| TRMT1L    | 2 |
| TRPC1     | 2 |
| TRPM1     | 2 |
| TRPM4     | 2 |
| TRRAP     | 2 |
| TSC22D1   | 2 |
| TSGA13    | 2 |
| TSHZ3     | 2 |
| TSNAX     | 2 |
| TSPAN14   | 2 |
| TSPAN7    | 2 |
| TTC24     | 2 |
| TTC37     | 2 |
| TTC38     | 2 |
| TTC40     | 2 |
| TTC9      | 2 |
| TTC9C     | 2 |
| TTF1      | 2 |
| TTLL3     | 2 |
| TUBB4A    | 2 |
| TUBG2     | 2 |
| TUG1      | 2 |

|           |   |
|-----------|---|
| TULP4     | 2 |
| TVP23B    | 2 |
| TWIST1    | 2 |
| TWIST2    | 2 |
| TXLNG     | 2 |
| TXN2      | 2 |
| TXNDC17   | 2 |
| U2AF1L4   | 2 |
| UBAC2-AS1 | 2 |
| UBE2A     | 2 |
| UBE4B     | 2 |
| UBTF      | 2 |
| UCKL1     | 2 |
| UCP2      | 2 |
| UCP3      | 2 |
| UFSP2     | 2 |
| ULK2      | 2 |
| UNC119    | 2 |
| UNC13D    | 2 |
| UNC79     | 2 |
| UNC80     | 2 |
| UNCX      | 2 |
| UROC1     | 2 |
| USP19     | 2 |
| USP22     | 2 |
| USP5      | 2 |
| VAMP2     | 2 |
| VAMP5     | 2 |
| VANGL1    | 2 |
| VAX1      | 2 |
| VCPIP1    | 2 |
| VEZF1     | 2 |
| VPREB1    | 2 |
| VSTM2B    | 2 |
| VWA9      | 2 |
| WDR16     | 2 |
| WDR26     | 2 |
| WDR54     | 2 |
| WDR78     | 2 |
| WDR81     | 2 |
| WDR82     | 2 |
| WDSUB1    | 2 |
| WDYHV1    | 2 |

|          |   |
|----------|---|
| WFIKKN1  | 2 |
| WNK3     | 2 |
| WNT2     | 2 |
| WNT3A    | 2 |
| XBP1     | 2 |
| XIRP1    | 2 |
| XIRP2    | 2 |
| XKR5     | 2 |
| XPNPEP3  | 2 |
| YBEY     | 2 |
| YJEFN3   | 2 |
| YWHAB    | 2 |
| ZAP70    | 2 |
| ZBED6    | 2 |
| ZBTB44   | 2 |
| ZBTB9    | 2 |
| ZCCHC11  | 2 |
| ZDHHC8P1 | 2 |
| ZEB1-AS1 | 2 |
| ZEB2-AS1 | 2 |
| ZFAT     | 2 |
| ZFP62    | 2 |
| ZG16B    | 2 |
| ZHX2     | 2 |
| ZIC4     | 2 |
| ZMAT4    | 2 |
| ZMIZ1    | 2 |
| ZMIZ2    | 2 |
| ZNF114   | 2 |
| ZNF192   | 2 |
| ZNF20    | 2 |
| ZNF3     | 2 |
| ZNF302   | 2 |
| ZNF32    | 2 |
| ZNF321P  | 2 |
| ZNF444   | 2 |
| ZNF468   | 2 |
| ZNF473   | 2 |
| ZNF496   | 2 |
| ZNF507   | 2 |
| ZNF516   | 2 |
| ZNF581   | 2 |
| ZNF592   | 2 |

|         |   |
|---------|---|
| ZNF596  | 2 |
| ZNF605  | 2 |
| ZNF615  | 2 |
| ZNF652  | 2 |
| ZNF662  | 2 |
| ZNF717  | 2 |
| ZNF784  | 2 |
| ZNF789  | 2 |
| ZNF837  | 2 |
| ZPBP    | 2 |
| ZPBP2   | 2 |
| ZYX     | 2 |
| ZZEF1   | 2 |
| 42066   | 1 |
| 42074   | 1 |
| 42258   | 1 |
| A2M     | 1 |
| A2M-AS1 | 1 |
| A4GNT   | 1 |
| AA06    | 1 |
| AAMDC   | 1 |
| AANAT   | 1 |
| ABAT    | 1 |
| ABCA17P | 1 |
| ABCC8   | 1 |
| ABCD1   | 1 |
| ABCF3   | 1 |
| ABCG1   | 1 |
| ABHD1   | 1 |
| ABHD3   | 1 |
| ABHD6   | 1 |
| ABP1    | 1 |
| ABT1    | 1 |
| ACACB   | 1 |
| ACAP3   | 1 |
| ACAT1   | 1 |
| ACER1   | 1 |
| ACER2   | 1 |
| ACOT4   | 1 |
| ACP6    | 1 |
| ACRBP   | 1 |
| ACRC    | 1 |
| ACSBG2  | 1 |

|             |   |
|-------------|---|
| ACSL1       | 1 |
| ACSL5       | 1 |
| ACTA1       | 1 |
| ACTC1       | 1 |
| ACTL10      | 1 |
| ACTL6B      | 1 |
| ACTL7B      | 1 |
| ACTL8       | 1 |
| ACTR1A      | 1 |
| ACTR1B      | 1 |
| ACTRT1      | 1 |
| ACVR2B-AS1  | 1 |
| ACVRL1      | 1 |
| ADAM19      | 1 |
| ADAMTS18    | 1 |
| ADAMTS19    | 1 |
| ADAMTS2     | 1 |
| ADAMTS3     | 1 |
| ADAMTS5     | 1 |
| ADAMTS6     | 1 |
| ADAMTS7     | 1 |
| ADARB2-AS1  | 1 |
| ADCK2       | 1 |
| ADCK3       | 1 |
| ADCY3       | 1 |
| ADCY8       | 1 |
| ADH5        | 1 |
| ADIPOQ-AS1  | 1 |
| ADM         | 1 |
| ADO         | 1 |
| ADORA2A     | 1 |
| ADORA2A-AS1 | 1 |
| ADORA2B     | 1 |
| ADORA3      | 1 |
| ADRA1B      | 1 |
| ADRA1D      | 1 |
| ADRA2A      | 1 |
| AEBP1       | 1 |
| AGAP4       | 1 |
| AGAP5       | 1 |
| AGAP6       | 1 |
| AGAP7       | 1 |
| AGAP8       | 1 |

|           |   |
|-----------|---|
| AGAP9     | 1 |
| AGBL2     | 1 |
| AGBL3     | 1 |
| AGL       | 1 |
| AGPAT1    | 1 |
| AGPAT3    | 1 |
| AGPAT6    | 1 |
| AGSK1     | 1 |
| AGXT2L2   | 1 |
| AHDC1     | 1 |
| AKAP11    | 1 |
| AKAP12    | 1 |
| AKAP5     | 1 |
| AKR1B15   | 1 |
| AKR7A2    | 1 |
| ALDH3A1   | 1 |
| ALDH6A1   | 1 |
| ALDOC     | 1 |
| ALKBH4    | 1 |
| ALKBH7    | 1 |
| ALOX15P1  | 1 |
| ALPK2     | 1 |
| ALPP      | 1 |
| ALPPL2    | 1 |
| ALX3      | 1 |
| AMBN      | 1 |
| AMH       | 1 |
| AMIGO1    | 1 |
| AMZ2P1    | 1 |
| ANAPC15   | 1 |
| ANAPC1P1  | 1 |
| ANAPC4    | 1 |
| ANGPTL7   | 1 |
| ANK3      | 1 |
| ANKFN1    | 1 |
| ANKLE2    | 1 |
| ANKRD10   | 1 |
| ANKRD13B  | 1 |
| ANKRD13D  | 1 |
| ANKRD28   | 1 |
| ANKRD30BL | 1 |
| ANKRD34B  | 1 |
| ANKRD39   | 1 |



|              |   |
|--------------|---|
| ANKRD46      | 1 |
| ANKRD49      | 1 |
| ANKRD66      | 1 |
| ANKS6        | 1 |
| ANO8         | 1 |
| ANP32A-IT1   | 1 |
| ANXA9        | 1 |
| AOC3         | 1 |
| AOC4         | 1 |
| AOX1         | 1 |
| AP1G2        | 1 |
| AP3B2        | 1 |
| AP4M1        | 1 |
| APBA3        | 1 |
| APC2         | 1 |
| APCDD1       | 1 |
| APEH         | 1 |
| APIP         | 1 |
| APLP2        | 1 |
| APOBEC1      | 1 |
| APOBEC3G     | 1 |
| APOC4        | 1 |
| APOC4-APOC2  | 1 |
| APOF         | 1 |
| APOPT1       | 1 |
| APPBP2       | 1 |
| AQP12A       | 1 |
| AQP12B       | 1 |
| AQP2         | 1 |
| AQP9         | 1 |
| ARAP1        | 1 |
| ARF6         | 1 |
| ARFGEF2      | 1 |
| ARHGAP21     | 1 |
| ARHGAP23     | 1 |
| ARHGAP35     | 1 |
| ARHGAP5-AS1  | 1 |
| ARHGAP6      | 1 |
| ARHGDIA      | 1 |
| ARHGEF1      | 1 |
| ARHGEF26-AS1 | 1 |
| ARHGEF5      | 1 |
| ARID3A       | 1 |

|             |   |
|-------------|---|
| ARID3C      | 1 |
| ARID5B      | 1 |
| ARL14EP     | 1 |
| ARL16       | 1 |
| ARL4C       | 1 |
| ARL4D       | 1 |
| ARMC1       | 1 |
| ARMC12      | 1 |
| ARMC2       | 1 |
| ARMCX5-GPRA | 1 |
| ARRDC5      | 1 |
| ASAH1       | 1 |
| ASB14       | 1 |
| ASCL2       | 1 |
| ASH1L-AS1   | 1 |
| ASIC2       | 1 |
| ASPRV1      | 1 |
| ATCAY       | 1 |
| ATF7        | 1 |
| ATG2B       | 1 |
| ATG3        | 1 |
| ATHL1       | 1 |
| ATL3        | 1 |
| ATN1        | 1 |
| ATOH1       | 1 |
| ATOH7       | 1 |
| ATP1A3      | 1 |
| ATP1B1      | 1 |
| ATP6AP2     | 1 |
| ATP6V0CP3   | 1 |
| ATP6V1G1    | 1 |
| ATPBD4-AS1  | 1 |
| AUP1        | 1 |
| B2M         | 1 |
| B3GAT2      | 1 |
| B3GNT5      | 1 |
| B3GNT7      | 1 |
| B3GNT8      | 1 |
| B4GALNT3    | 1 |
| B4GALT1     | 1 |
| BAI1        | 1 |
| BAI2        | 1 |
| BAIAP2L2    | 1 |

|              |   |
|--------------|---|
| BARD1        | 1 |
| BASP1        | 1 |
| BATF3        | 1 |
| BCAP29       | 1 |
| BCL3         | 1 |
| BCL6         | 1 |
| BCL9         | 1 |
| BDH1         | 1 |
| BEGAIN       | 1 |
| BEND3        | 1 |
| BGLAP        | 1 |
| BGN          | 1 |
| BHLHA15      | 1 |
| BHLHE40      | 1 |
| BHLHE40-AS1  | 1 |
| BIK          | 1 |
| BLOC1S5-TXNI | 1 |
| BMP2         | 1 |
| BMP3         | 1 |
| BMP6         | 1 |
| BMP8A        | 1 |
| BMS1P1       | 1 |
| BMS1P4       | 1 |
| BMS1P5       | 1 |
| BNC2         | 1 |
| BNIP3        | 1 |
| BOLL         | 1 |
| BPIFA4P      | 1 |
| BPIFB6       | 1 |
| BRAT1        | 1 |
| BREA2        | 1 |
| BRICD5       | 1 |
| BSND         | 1 |
| BSX          | 1 |
| BTBD16       | 1 |
| BTD          | 1 |
| BTG4         | 1 |
| BVES         | 1 |
| C10orf107    | 1 |
| C10orf111    | 1 |
| C10orf116    | 1 |
| C10orf129    | 1 |
| C10orf25     | 1 |

|           |   |
|-----------|---|
| C10orf35  | 1 |
| C10orf67  | 1 |
| C10orf99  | 1 |
| C11orf20  | 1 |
| C11orf44  | 1 |
| C11orf45  | 1 |
| C11orf52  | 1 |
| C11orf84  | 1 |
| C11orf95  | 1 |
| C12orf43  | 1 |
| C12orf45  | 1 |
| C12orf69  | 1 |
| C14orf132 | 1 |
| C14orf142 | 1 |
| C15orf26  | 1 |
| C15orf55  | 1 |
| C15orf60  | 1 |
| C15orf61  | 1 |
| C16orf45  | 1 |
| C16orf80  | 1 |
| C16orf87  | 1 |
| C16orf96  | 1 |
| C17orf107 | 1 |
| C17orf62  | 1 |
| C17orf82  | 1 |
| C17orf85  | 1 |
| C17orf96  | 1 |
| C17orf97  | 1 |
| C17orf99  | 1 |
| C18orf56  | 1 |
| C18orf63  | 1 |
| C18orf8   | 1 |
| C19orf10  | 1 |
| C19orf25  | 1 |
| C19orf26  | 1 |
| C19orf43  | 1 |
| C19orf55  | 1 |
| C19orf70  | 1 |
| C19orf73  | 1 |
| C19orf81  | 1 |
| C1orf126  | 1 |
| C1orf158  | 1 |
| C1orf174  | 1 |

|           |   |
|-----------|---|
| C1orf180  | 1 |
| C1orf186  | 1 |
| C1orf189  | 1 |
| C1orf194  | 1 |
| C1orf204  | 1 |
| C1orf226  | 1 |
| C1orf229  | 1 |
| C1orf233  | 1 |
| C1orf63   | 1 |
| C1orf94   | 1 |
| C1QL3     | 1 |
| C1QTNF9B  | 1 |
| C1R       | 1 |
| C1RL-AS1  | 1 |
| C20orf201 | 1 |
| C21orf88  | 1 |
| C22orf26  | 1 |
| C22orf29  | 1 |
| C2CD4C    | 1 |
| C2CD5     | 1 |
| C2orf27A  | 1 |
| C2orf54   | 1 |
| C2orf72   | 1 |
| C2orf76   | 1 |
| C2orf82   | 1 |
| C3orf18   | 1 |
| C4orf17   | 1 |
| C5orf22   | 1 |
| C5orf27   | 1 |
| C5orf30   | 1 |
| C5orf38   | 1 |
| C5orf52   | 1 |
| C6orf123  | 1 |
| C6orf57   | 1 |
| C7orf13   | 1 |
| C8orf22   | 1 |
| C8orf31   | 1 |
| C8orf37   | 1 |
| C8orf40   | 1 |
| C8orf42   | 1 |
| C8orf56   | 1 |
| C8orf82   | 1 |
| C9        | 1 |

|             |   |
|-------------|---|
| C9orf142    | 1 |
| C9orf16     | 1 |
| C9orf163    | 1 |
| C9orf172    | 1 |
| C9orf24     | 1 |
| C9orf50     | 1 |
| C9orf62     | 1 |
| C9orf85     | 1 |
| CA4         | 1 |
| CA5BP1      | 1 |
| CABP2       | 1 |
| CABP4       | 1 |
| CACHD1      | 1 |
| CACNA1C-AS1 | 1 |
| CACNA2D3    | 1 |
| CACNB1      | 1 |
| CACNB4      | 1 |
| CACNG1      | 1 |
| CACNG3      | 1 |
| CALM3       | 1 |
| CALML6      | 1 |
| CALN1       | 1 |
| CAMKK1      | 1 |
| CAPG        | 1 |
| CAPN2       | 1 |
| CARD11      | 1 |
| CASQ1       | 1 |
| CAST        | 1 |
| CBFA2T3     | 1 |
| CBX6        | 1 |
| CCDC111     | 1 |
| CCDC116     | 1 |
| CCDC129     | 1 |
| CCDC13-AS1  | 1 |
| CCDC130     | 1 |
| CCDC141     | 1 |
| CCDC151     | 1 |
| CCDC176     | 1 |
| CCDC23      | 1 |
| CCDC3       | 1 |
| CCDC74B-AS1 | 1 |
| CCDC82      | 1 |
| CCDC88B     | 1 |

|           |   |
|-----------|---|
| CCDC90A   | 1 |
| CCDC92    | 1 |
| CCL19     | 1 |
| CCL28     | 1 |
| CCL8      | 1 |
| CCNB1     | 1 |
| CCND2     | 1 |
| CCNE1     | 1 |
| CCNF      | 1 |
| CCNJL     | 1 |
| CCR10     | 1 |
| CCR7      | 1 |
| CCSAP     | 1 |
| CCT2      | 1 |
| CD160     | 1 |
| CD177     | 1 |
| CD180     | 1 |
| CD40LG    | 1 |
| CD48      | 1 |
| CD52      | 1 |
| CD81      | 1 |
| CD9       | 1 |
| CD93      | 1 |
| CDC20     | 1 |
| CDC42BPG  | 1 |
| CDCP1     | 1 |
| CDCP2     | 1 |
| CDH11     | 1 |
| CDH22     | 1 |
| CDH5      | 1 |
| CDK4      | 1 |
| CDK9      | 1 |
| CDKL2     | 1 |
| CDR2L     | 1 |
| CDRT7     | 1 |
| CEACAM4   | 1 |
| CECR2     | 1 |
| CEL       | 1 |
| CELF2-AS2 | 1 |
| CELF5     | 1 |
| CELF6     | 1 |
| CELSR2    | 1 |
| CEMP1     | 1 |

|           |   |
|-----------|---|
| CENPF     | 1 |
| CENPI     | 1 |
| CEP112    | 1 |
| CEP290    | 1 |
| CEP68     | 1 |
| CEP72     | 1 |
| CEP95     | 1 |
| CERCAM    | 1 |
| CERK      | 1 |
| CERS1     | 1 |
| CES5AP1   | 1 |
| CETN2     | 1 |
| CFHR1     | 1 |
| CFHR2     | 1 |
| CFLAR-AS1 | 1 |
| CGB2      | 1 |
| CHAD      | 1 |
| CHAF1A    | 1 |
| CHCHD10   | 1 |
| CHD1      | 1 |
| CHD5      | 1 |
| CHDH      | 1 |
| CHID1     | 1 |
| CHL1      | 1 |
| CHMP1B    | 1 |
| CHN1      | 1 |
| CHPF2     | 1 |
| CHPT1     | 1 |
| CHRDL2    | 1 |
| CHRN2     | 1 |
| CHST14    | 1 |
| CHST3     | 1 |
| CIDEB     | 1 |
| CILP2     | 1 |
| CISD1     | 1 |
| CISD2     | 1 |
| CITED4    | 1 |
| CLCA2     | 1 |
| CLDN3     | 1 |
| CLDN4     | 1 |
| CLEC18B   | 1 |
| CLEC18C   | 1 |
| CLEC2L    | 1 |



|          |   |
|----------|---|
| CLEC9A   | 1 |
| CLIC3    | 1 |
| CLIC4    | 1 |
| CLK3     | 1 |
| CLMP     | 1 |
| CLPSL1   | 1 |
| CLUL1    | 1 |
| CLYBL    | 1 |
| CNGA1    | 1 |
| CNKSR3   | 1 |
| CNN3     | 1 |
| CNPY4    | 1 |
| CNTD1    | 1 |
| CNTD2    | 1 |
| CNTNAP3  | 1 |
| CNTNAP3B | 1 |
| CNTNAP5  | 1 |
| COA3     | 1 |
| COA5     | 1 |
| COBL     | 1 |
| COG1     | 1 |
| COL15A1  | 1 |
| COL17A1  | 1 |
| COL1A1   | 1 |
| COL24A1  | 1 |
| COL27A1  | 1 |
| COL3A1   | 1 |
| COL4A1   | 1 |
| COL5A2   | 1 |
| COL5A3   | 1 |
| COL6A4P1 | 1 |
| COL9A1   | 1 |
| COL9A2   | 1 |
| COLEC11  | 1 |
| COMMMD3  | 1 |
| COMP     | 1 |
| COMT     | 1 |
| COPS3    | 1 |
| COQ4     | 1 |
| COQ6     | 1 |
| CORO2A   | 1 |
| CORO2B   | 1 |
| COX5B    | 1 |

|          |   |
|----------|---|
| COX7A2L  | 1 |
| CPLX1    | 1 |
| CPN1     | 1 |
| CPNE2    | 1 |
| CPNE4    | 1 |
| CPNE5    | 1 |
| CPS1     | 1 |
| CPT1B    | 1 |
| CRB1     | 1 |
| CRCT1    | 1 |
| CREB3L1  | 1 |
| CRIP1    | 1 |
| CRIP3    | 1 |
| CRIPT    | 1 |
| CRP      | 1 |
| CRTC2    | 1 |
| CRX      | 1 |
| CRYBG3   | 1 |
| CRYGD    | 1 |
| CSDC2    | 1 |
| CSF1R    | 1 |
| CSMD1    | 1 |
| CSMD2    | 1 |
| CSPG4P1Y | 1 |
| CST1     | 1 |
| CST13P   | 1 |
| CST2     | 1 |
| CST3     | 1 |
| CST7     | 1 |
| CT45A1   | 1 |
| CT45A2   | 1 |
| CT45A3   | 1 |
| CT45A4   | 1 |
| CT45A6   | 1 |
| CT60     | 1 |
| CT62     | 1 |
| CTR9     | 1 |
| CTRL     | 1 |
| CTSD     | 1 |
| CTSG     | 1 |
| CTSL1P2  | 1 |
| CTSL1P8  | 1 |
| CTXN1    | 1 |

|          |   |
|----------|---|
| CUL4B    | 1 |
| CUX2     | 1 |
| CWC15    | 1 |
| CX3CL1   | 1 |
| CXorf49  | 1 |
| CXorf49B | 1 |
| CXXC4    | 1 |
| CYB5R1   | 1 |
| CYBA     | 1 |
| CYGB     | 1 |
| CYMP     | 1 |
| CYP1A1   | 1 |
| CYP1B1   | 1 |
| CYP21A1P | 1 |
| CYP27B1  | 1 |
| CYP2R1   | 1 |
| CYP46A1  | 1 |
| CYP4F12  | 1 |
| CYP4F24P | 1 |
| CYP4V2   | 1 |
| CYTH3    | 1 |
| CYTL1    | 1 |
| DAAM1    | 1 |
| DACT1    | 1 |
| DAGLA    | 1 |
| DANCR    | 1 |
| DAP      | 1 |
| DARC     | 1 |
| DBIL5P   | 1 |
| DCAF12L1 | 1 |
| DCAF12L2 | 1 |
| DCAF15   | 1 |
| DCLRE1B  | 1 |
| DCTN6    | 1 |
| DDHD2    | 1 |
| DDIT4    | 1 |
| DDN      | 1 |
| DDT      | 1 |
| DDX11L2  | 1 |
| DDX11L5  | 1 |
| DEAF1    | 1 |
| DEF6     | 1 |
| DERL2    | 1 |

|               |   |
|---------------|---|
| DFNB31        | 1 |
| DGCR10        | 1 |
| DGKD          | 1 |
| DHH           | 1 |
| DIO3          | 1 |
| DIP2A         | 1 |
| DIRAS2        | 1 |
| DIRC2         | 1 |
| DKFZP434A062  | 1 |
| DKFZP434H168  | 1 |
| DKFZP434K028  | 1 |
| DKFZP586I1420 | 1 |
| DKK2          | 1 |
| DLEU1         | 1 |
| DLEU7-AS1     | 1 |
| DLG4          | 1 |
| DLGAP1-AS5    | 1 |
| DLGAP4        | 1 |
| DLK1          | 1 |
| DLX2          | 1 |
| DMGDH         | 1 |
| DMKN          | 1 |
| DMRT1         | 1 |
| DMRTA2        | 1 |
| DMRTC2        | 1 |
| DMWD          | 1 |
| DNAJB1        | 1 |
| DNAJC27-AS1   | 1 |
| DNAJC30       | 1 |
| DNAJC6        | 1 |
| DNALI1        | 1 |
| DNPEP         | 1 |
| DNTTIP1       | 1 |
| DOC2A         | 1 |
| DOCK11        | 1 |
| DOK1          | 1 |
| DOM3Z         | 1 |
| DPH1          | 1 |
| DPP8          | 1 |
| DPP9          | 1 |
| DRAXIN        | 1 |
| DSE           | 1 |
| DSG1          | 1 |

|            |   |
|------------|---|
| DSG2       | 1 |
| DTX3       | 1 |
| DUSP13     | 1 |
| DUSP14     | 1 |
| DUSP2      | 1 |
| DUSP8      | 1 |
| DUSP9      | 1 |
| DVL2       | 1 |
| DYRK1A     | 1 |
| DZIP3      | 1 |
| E4F1       | 1 |
| EBPL       | 1 |
| ECE1       | 1 |
| ECEL1      | 1 |
| ECHS1      | 1 |
| EDA2R      | 1 |
| EDIL3      | 1 |
| EEF1A2     | 1 |
| EEF1DP3    | 1 |
| EEF1G      | 1 |
| EEF2       | 1 |
| EFCAB6-AS1 | 1 |
| EGFL7      | 1 |
| EGR4       | 1 |
| EIF1AX     | 1 |
| EIF2B5     | 1 |
| EIF3CL     | 1 |
| EIF3D      | 1 |
| EIF3G      | 1 |
| EIF3I      | 1 |
| EIF4B      | 1 |
| EIF4EBP1   | 1 |
| EIF4EBP2   | 1 |
| ELMO3      | 1 |
| ELP3       | 1 |
| ELP5       | 1 |
| EMB        | 1 |
| EMBP1      | 1 |
| EMID2      | 1 |
| EMP1       | 1 |
| EN2        | 1 |
| ENDOD1     | 1 |
| ENHO       | 1 |

|           |   |
|-----------|---|
| ENKD1     | 1 |
| EP400     | 1 |
| EPB41L2   | 1 |
| EPB41L4A  | 1 |
| EPB49     | 1 |
| EPDR1     | 1 |
| EPHA1     | 1 |
| EPHA1-AS1 | 1 |
| EPHA7     | 1 |
| EPHB3     | 1 |
| EPHX4     | 1 |
| EPN1      | 1 |
| EPO       | 1 |
| EPS8L1    | 1 |
| EPS8L2    | 1 |
| ERF       | 1 |
| ERGIC1    | 1 |
| ESAM      | 1 |
| ESCO1     | 1 |
| ESPNL     | 1 |
| ESRG      | 1 |
| ESRP2     | 1 |
| ESRRA     | 1 |
| ESX1      | 1 |
| EVI5L     | 1 |
| EVPLL     | 1 |
| EVX2      | 1 |
| EXOC3     | 1 |
| EXT1      | 1 |
| EZH1      | 1 |
| F11R      | 1 |
| F2RL1     | 1 |
| F9        | 1 |
| FADD      | 1 |
| FADS2     | 1 |
| FADS6     | 1 |
| FAH       | 1 |
| FAHD2A    | 1 |
| FAHD2B    | 1 |
| FAHD2CP   | 1 |
| FAM102B   | 1 |
| FAM105A   | 1 |
| FAM108C1  | 1 |

|             |   |
|-------------|---|
| FAM109B     | 1 |
| FAM117A     | 1 |
| FAM118B     | 1 |
| FAM120B     | 1 |
| FAM122A     | 1 |
| FAM126B     | 1 |
| FAM129B     | 1 |
| FAM135B     | 1 |
| FAM138A     | 1 |
| FAM138B     | 1 |
| FAM138C     | 1 |
| FAM138E     | 1 |
| FAM138F     | 1 |
| FAM150B     | 1 |
| FAM155A     | 1 |
| FAM156A     | 1 |
| FAM160A1    | 1 |
| FAM160B2    | 1 |
| FAM162A     | 1 |
| FAM166A     | 1 |
| FAM167B     | 1 |
| FAM171B     | 1 |
| FAM175A     | 1 |
| FAM175B     | 1 |
| FAM181A-AS1 | 1 |
| FAM195A     | 1 |
| FAM203A     | 1 |
| FAM207A     | 1 |
| FAM209A     | 1 |
| FAM211B     | 1 |
| FAM222A     | 1 |
| FAM224A     | 1 |
| FAM224B     | 1 |
| FAM225B     | 1 |
| FAM226A     | 1 |
| FAM226B     | 1 |
| FAM22A      | 1 |
| FAM22D      | 1 |
| FAM47E      | 1 |
| FAM50A      | 1 |
| FAM57A      | 1 |
| FAM65A      | 1 |
| FAM65B      | 1 |

|           |   |
|-----------|---|
| FAM78A    | 1 |
| FAM82A2   | 1 |
| FAM83D    | 1 |
| FAM84A    | 1 |
| FAM86B2   | 1 |
| FAM86DP   | 1 |
| FAM91A1   | 1 |
| FAM92A1   | 1 |
| FANK1     | 1 |
| FAR1      | 1 |
| FBLIM1    | 1 |
| FBLN5     | 1 |
| FBN1      | 1 |
| FBRS      | 1 |
| FBRSL1    | 1 |
| FBXL15    | 1 |
| FBXL16    | 1 |
| FBXO17    | 1 |
| FBXO18    | 1 |
| FBXO36    | 1 |
| FBXO45    | 1 |
| FBXO8     | 1 |
| FBXW4     | 1 |
| FBXW7     | 1 |
| FEM1C     | 1 |
| FGF1      | 1 |
| FGF10     | 1 |
| FGF13-AS1 | 1 |
| FGF14-AS2 | 1 |
| FGF18     | 1 |
| FGF21     | 1 |
| FGF3      | 1 |
| FGF9      | 1 |
| FGR       | 1 |
| FHOD1     | 1 |
| FIGF      | 1 |
| FIGLA     | 1 |
| FLJ16341  | 1 |
| FLJ23867  | 1 |
| FLJ27352  | 1 |
| FLJ31813  | 1 |
| FLJ34208  | 1 |
| FLJ35024  | 1 |



|          |   |
|----------|---|
| FLJ35946 | 1 |
| FLJ41350 | 1 |
| FLJ41649 | 1 |
| FLJ42102 | 1 |
| FLJ42627 | 1 |
| FLJ43315 | 1 |
| FLJ45340 | 1 |
| FLJ46066 | 1 |
| FLJ46257 | 1 |
| FLJ46361 | 1 |
| FLJ46906 | 1 |
| FLOT2    | 1 |
| FLT3     | 1 |
| FLVCR2   | 1 |
| FMN2     | 1 |
| FMNL1    | 1 |
| FNBP1    | 1 |
| FNDC1    | 1 |
| FOLH1B   | 1 |
| FOS      | 1 |
| FOSL2    | 1 |
| FOXA1    | 1 |
| FOXB1    | 1 |
| FOXC2    | 1 |
| FOXD3    | 1 |
| FOXF1    | 1 |
| FOXF2    | 1 |
| FOXG1    | 1 |
| FOXH1    | 1 |
| FOXL1    | 1 |
| FOXL2    | 1 |
| FOXN3    | 1 |
| FOXN4    | 1 |
| FOXO1    | 1 |
| FOXO3B   | 1 |
| FRAT2    | 1 |
| FREM2    | 1 |
| FRG1B    | 1 |
| FRMPD1   | 1 |
| FRRS1L   | 1 |
| FRS3     | 1 |
| FSD1     | 1 |
| FTH1     | 1 |

|            |   |
|------------|---|
| FTL        | 1 |
| FTSJ2      | 1 |
| FTSJD2     | 1 |
| FUT8-AS1   | 1 |
| FXR2       | 1 |
| FYTTD1     | 1 |
| FZD5       | 1 |
| FZD7       | 1 |
| FZD9       | 1 |
| G0S2       | 1 |
| GABARAPL2  | 1 |
| GABRB3     | 1 |
| GADD45B    | 1 |
| GADD45GIP1 | 1 |
| GAL3ST2    | 1 |
| GALNT4     | 1 |
| GALNT6     | 1 |
| GALNT9     | 1 |
| GALNTL6    | 1 |
| GALR3      | 1 |
| GATA2      | 1 |
| GATA4      | 1 |
| GATA6      | 1 |
| GBAP1      | 1 |
| GBP3       | 1 |
| GCGR       | 1 |
| GCKR       | 1 |
| GCLM       | 1 |
| GDF1       | 1 |
| GDF6       | 1 |
| GDF7       | 1 |
| GDPD3      | 1 |
| GDPD5      | 1 |
| GDPGP1     | 1 |
| GET4       | 1 |
| GFER       | 1 |
| GGA1       | 1 |
| GHITM      | 1 |
| GID4       | 1 |
| GID8       | 1 |
| GJB2       | 1 |
| GJC2       | 1 |
| GJD4       | 1 |

|           |   |
|-----------|---|
| GLB1L3    | 1 |
| GLCCI1    | 1 |
| GLI2      | 1 |
| GLI3      | 1 |
| GLRX5     | 1 |
| GLYATL1   | 1 |
| GLYR1     | 1 |
| GMCL1     | 1 |
| GMDS      | 1 |
| GMEB2     | 1 |
| GNAT2     | 1 |
| GNB1L     | 1 |
| GNB2      | 1 |
| GNG12     | 1 |
| GNN       | 1 |
| GOLGA2P2Y | 1 |
| GOLGA2P3Y | 1 |
| GOLT1A    | 1 |
| GOLT1B    | 1 |
| GP9       | 1 |
| GPAT2     | 1 |
| GPBP1     | 1 |
| GPHA2     | 1 |
| GPR108    | 1 |
| GPR119    | 1 |
| GPR12     | 1 |
| GPR124    | 1 |
| GPR135    | 1 |
| GPR149    | 1 |
| GPR153    | 1 |
| GPR161    | 1 |
| GPR31     | 1 |
| GPR39     | 1 |
| GPR50     | 1 |
| GPR68     | 1 |
| GPR77     | 1 |
| GPR88     | 1 |
| GPR89B    | 1 |
| GPRC5B    | 1 |
| GPS2      | 1 |
| GPT       | 1 |
| GPT2      | 1 |
| GPX4      | 1 |

|           |   |
|-----------|---|
| GRAMD2    | 1 |
| GRHL1     | 1 |
| GRHL3     | 1 |
| GRID1     | 1 |
| GRIN2C    | 1 |
| GRM4      | 1 |
| GRM6      | 1 |
| GRWD1     | 1 |
| GSE1      | 1 |
| GSS       | 1 |
| GSTCD     | 1 |
| GSTP1     | 1 |
| GTDC2     | 1 |
| GTF2E2    | 1 |
| GTF2IRD2  | 1 |
| GTF2IRD2B | 1 |
| GUCA2B    | 1 |
| GUSBP11   | 1 |
| GYPB      | 1 |
| GYPB      | 1 |
| H1FX-AS1  | 1 |
| H2AFY2    | 1 |
| H3F3A     | 1 |
| H3F3AP4   | 1 |
| H6PD      | 1 |
| HAAO      | 1 |
| HACE1     | 1 |
| HAND2     | 1 |
| HAPLN1    | 1 |
| HAPLN3    | 1 |
| HAR1A     | 1 |
| HARS2     | 1 |
| HAS1      | 1 |
| HAUS3     | 1 |
| HBD       | 1 |
| HBM       | 1 |
| HCFC2     | 1 |
| HCG25     | 1 |
| HCN1      | 1 |
| HCN4      | 1 |
| HDAC6     | 1 |
| HDDC2     | 1 |
| HDDC3     | 1 |

|           |   |
|-----------|---|
| HDHD3     | 1 |
| HEATR2    | 1 |
| HEATR3    | 1 |
| HEATR5A   | 1 |
| HECTD1    | 1 |
| HECTD4    | 1 |
| HELT      | 1 |
| HERC1     | 1 |
| HERC5     | 1 |
| HES3      | 1 |
| HEXDC     | 1 |
| HEXIM2    | 1 |
| HEY2      | 1 |
| HHATL     | 1 |
| HHEX      | 1 |
| HHLA2     | 1 |
| HIF1A     | 1 |
| HIGD2B    | 1 |
| HIPK4     | 1 |
| HIST1H1E  | 1 |
| HIST1H2BC | 1 |
| HIST1H2BF | 1 |
| HIST1H2BO | 1 |
| HIST1H4C  | 1 |
| HIST1H4K  | 1 |
| HKDC1     | 1 |
| HKR1      | 1 |
| HLCS      | 1 |
| HLF       | 1 |
| HLX       | 1 |
| HM13-AS1  | 1 |
| HMBS      | 1 |
| HMG20A    | 1 |
| HMSD      | 1 |
| HMX3      | 1 |
| HOMEZ     | 1 |
| HOXA10    | 1 |
| HOXA11-AS | 1 |
| HOXA13    | 1 |
| HOXB13    | 1 |
| HOXB5     | 1 |
| HOXB6     | 1 |
| HOXB7     | 1 |

|            |   |
|------------|---|
| HOXC10     | 1 |
| HOXC4      | 1 |
| HOXC5      | 1 |
| HOXD1      | 1 |
| HOXD12     | 1 |
| HOXD4      | 1 |
| HP1BP3     | 1 |
| HPCAL4     | 1 |
| HPYR1      | 1 |
| HRH1       | 1 |
| HRH2       | 1 |
| HRH3       | 1 |
| HS1BP3     | 1 |
| HS3ST2     | 1 |
| HS3ST4     | 1 |
| HS3ST6     | 1 |
| HS6ST2-AS1 | 1 |
| HSCB       | 1 |
| HSFX1      | 1 |
| HSFX2      | 1 |
| HSH2D      | 1 |
| HSP90B3P   | 1 |
| HSPA4L     | 1 |
| HSPB11     | 1 |
| HSPB2      | 1 |
| HSPBAP1    | 1 |
| HTR6       | 1 |
| HTRA1      | 1 |
| HTRA3      | 1 |
| HUNK       | 1 |
| HYAL1      | 1 |
| IAH1       | 1 |
| IARS2      | 1 |
| IBA57      | 1 |
| ICAM1      | 1 |
| IFI30      | 1 |
| IFIT3      | 1 |
| IFITM1     | 1 |
| IFITM10    | 1 |
| IFRD2      | 1 |
| IGF1R      | 1 |
| IGF2R      | 1 |
| IGFBP2     | 1 |

|             |   |
|-------------|---|
| IGFBP4      | 1 |
| IGSF22      | 1 |
| IHH         | 1 |
| IL12B       | 1 |
| IL16        | 1 |
| IL17C       | 1 |
| IL17D       | 1 |
| IL17RD      | 1 |
| IL1B        | 1 |
| IL1F10      | 1 |
| IL1R1       | 1 |
| IL1RAPL2    | 1 |
| IL21R-AS1   | 1 |
| IL27RA      | 1 |
| IL2RB       | 1 |
| IL3         | 1 |
| IL36G       | 1 |
| IL37        | 1 |
| IL6         | 1 |
| IL8         | 1 |
| ILF3-AS1    | 1 |
| ILVBL       | 1 |
| IMP4        | 1 |
| INA         | 1 |
| INADL       | 1 |
| ING5        | 1 |
| INGX        | 1 |
| INO80       | 1 |
| INO80B-WBP1 | 1 |
| INPP5J      | 1 |
| INS-IGF2    | 1 |
| INSRR       | 1 |
| INTS1       | 1 |
| INTU        | 1 |
| IPO13       | 1 |
| IPO9        | 1 |
| IQCF6       | 1 |
| IQUB        | 1 |
| IRAK2       | 1 |
| IRF1        | 1 |
| IRF2BP1     | 1 |
| IRF2BPL     | 1 |
| IRF8        | 1 |

|            |   |
|------------|---|
| IRGC       | 1 |
| IRGM       | 1 |
| IRS1       | 1 |
| IRX1       | 1 |
| IRX3       | 1 |
| IRX6       | 1 |
| ISOC1      | 1 |
| ITGA11     | 1 |
| ITGB8      | 1 |
| ITLN1      | 1 |
| ITPR2      | 1 |
| ITPRIP     | 1 |
| ITSN1      | 1 |
| JAZF1-AS1  | 1 |
| JUNB       | 1 |
| JUND       | 1 |
| KAAG1      | 1 |
| KAL1       | 1 |
| KALRN      | 1 |
| KANSL1-AS1 | 1 |
| KANSL2     | 1 |
| KBTBD13    | 1 |
| KBTBD5     | 1 |
| KCNA10     | 1 |
| KCNA2      | 1 |
| KCNA4      | 1 |
| KCNAB3     | 1 |
| KCNC3      | 1 |
| KCND2      | 1 |
| KCNE1      | 1 |
| KCNF1      | 1 |
| KCNJ10     | 1 |
| KCNJ18     | 1 |
| KCNJ2      | 1 |
| KCNJ6      | 1 |
| KCNK15     | 1 |
| KCNQ1DN    | 1 |
| KCNQ3      | 1 |
| KCNS3      | 1 |
| KCTD12     | 1 |
| KCTD21     | 1 |
| KDM4A-AS1  | 1 |
| KDM4B      | 1 |



|           |   |
|-----------|---|
| KDM6A     | 1 |
| KDR       | 1 |
| KDSR      | 1 |
| KEAP1     | 1 |
| KHDC1L    | 1 |
| KHDRBS2   | 1 |
| KIAA0247  | 1 |
| KIAA0355  | 1 |
| KIAA0556  | 1 |
| KIAA0895  | 1 |
| KIAA0895L | 1 |
| KIAA0930  | 1 |
| KIAA1024  | 1 |
| KIAA1045  | 1 |
| KIAA1147  | 1 |
| KIAA1199  | 1 |
| KIAA1257  | 1 |
| KIAA1430  | 1 |
| KIAA1468  | 1 |
| KIAA1644  | 1 |
| KIAA1737  | 1 |
| KIAA1958  | 1 |
| KIF13B    | 1 |
| KIF4B     | 1 |
| KIF6      | 1 |
| KIFC3     | 1 |
| KL        | 1 |
| KLF13     | 1 |
| KLF16     | 1 |
| KLF3      | 1 |
| KLHDC7A   | 1 |
| KLHL17    | 1 |
| KLHL2     | 1 |
| KLHL21    | 1 |
| KLHL23    | 1 |
| KLHL34    | 1 |
| KLHL8     | 1 |
| KLKP1     | 1 |
| KLLN      | 1 |
| KNDC1     | 1 |
| KRBA1     | 1 |
| KRT15     | 1 |
| KRT2      | 1 |

|           |   |
|-----------|---|
| KRT27     | 1 |
| KRT6A     | 1 |
| KRT71     | 1 |
| KRT73     | 1 |
| KRT8      | 1 |
| KRT81     | 1 |
| KRT82     | 1 |
| KRT8P41   | 1 |
| KRTAP10-2 | 1 |
| KRTAP10-8 | 1 |
| KRTAP12-4 | 1 |
| KRTAP2-1  | 1 |
| KRTAP4-1  | 1 |
| L3HYPDH   | 1 |
| L3MBTL1   | 1 |
| LACE1     | 1 |
| LAG3      | 1 |
| LAMA5     | 1 |
| LAMB1     | 1 |
| LAMTOR1   | 1 |
| LAMTOR4   | 1 |
| LAP3      | 1 |
| LATS1     | 1 |
| LATS2     | 1 |
| LBR       | 1 |
| LBX2-AS1  | 1 |
| LCA5L     | 1 |
| LCE2C     | 1 |
| LCE2D     | 1 |
| LCE3B     | 1 |
| LCN10     | 1 |
| LCNL1     | 1 |
| LCTL      | 1 |
| LDLRAD2   | 1 |
| LDLRAP1   | 1 |
| LECT2     | 1 |
| LENG8     | 1 |
| LETM1     | 1 |
| LGALS1    | 1 |
| LGALS7    | 1 |
| LGALS7B   | 1 |
| LGI1      | 1 |
| LGI3      | 1 |

|            |   |
|------------|---|
| LHFPL1     | 1 |
| LHFPL2     | 1 |
| LHFPL3-AS2 | 1 |
| LHFPL4     | 1 |
| LHX1       | 1 |
| LHX3       | 1 |
| LIFR       | 1 |
| LIN28A     | 1 |
| LIN28B     | 1 |
| LIN52      | 1 |
| LIN54      | 1 |
| LINC00113  | 1 |
| LINC00162  | 1 |
| LINC00163  | 1 |
| LINC00167  | 1 |
| LINC00200  | 1 |
| LINC00208  | 1 |
| LINC00221  | 1 |
| LINC00229  | 1 |
| LINC00235  | 1 |
| LINC00244  | 1 |
| LINC00297  | 1 |
| LINC00304  | 1 |
| LINC00312  | 1 |
| LINC00317  | 1 |
| LINC00338  | 1 |
| LINC00439  | 1 |
| LINC00462  | 1 |
| LINC00475  | 1 |
| LINC00479  | 1 |
| LINC00485  | 1 |
| LINC00514  | 1 |
| LINC00577  | 1 |
| LINC00588  | 1 |
| LINC00602  | 1 |
| LINC00606  | 1 |
| LINC00622  | 1 |
| LINC00628  | 1 |
| LINC00640  | 1 |
| LINC00649  | 1 |
| LINC00668  | 1 |
| LINC00673  | 1 |
| LINC00696  | 1 |

|              |   |
|--------------|---|
| LIPG         | 1 |
| LLGL1        | 1 |
| LMBR1L       | 1 |
| LMCD1        | 1 |
| LMF2         | 1 |
| LMO7         | 1 |
| LNK1         | 1 |
| LNK2         | 1 |
| LOC100127983 | 1 |
| LOC100128264 | 1 |
| LOC100128568 | 1 |
| LOC100128593 | 1 |
| LOC100128750 | 1 |
| LOC100128881 | 1 |
| LOC100129345 | 1 |
| LOC100129617 | 1 |
| LOC100130417 | 1 |
| LOC100130880 | 1 |
| LOC100130894 | 1 |
| LOC100130950 | 1 |
| LOC100130987 | 1 |
| LOC100131094 | 1 |
| LOC100131096 | 1 |
| LOC100131496 | 1 |
| LOC100131655 | 1 |
| LOC100131691 | 1 |
| LOC100131825 | 1 |
| LOC100132077 | 1 |
| LOC100132273 | 1 |
| LOC100133445 | 1 |
| LOC100134259 | 1 |
| LOC100134368 | 1 |
| LOC100144603 | 1 |
| LOC100169752 | 1 |
| LOC100268168 | 1 |
| LOC100271836 | 1 |
| LOC100272216 | 1 |
| LOC100287010 | 1 |
| LOC100287036 | 1 |
| LOC100287072 | 1 |
| LOC100288122 | 1 |
| LOC100288346 | 1 |
| LOC100288524 | 1 |

LOC100288570 1  
LOC100288911 1  
LOC100289341 1  
LOC100289361 1  
LOC100289656 1  
LOC100379224 1  
LOC100505540 1  
LOC100505622 1  
LOC100505633 1  
LOC100505679 1  
LOC100505768 1  
LOC100505817 1  
LOC100506023 1  
LOC100506035 1  
LOC100506100 1  
LOC100506321 1  
LOC100506403 1  
LOC100506421 1  
LOC100506472 1  
LOC100506585 1  
LOC100506655 1  
LOC100506688 1  
LOC100506795 1  
LOC100506963 1  
LOC100507250 1  
LOC100507299 1  
LOC100507334 1  
LOC100507472 1  
LOC100507501 1  
LOC100630918 1  
LOC100652791 1  
LOC100859930 1  
LOC100862671 1  
LOC100996307 1  
LOC115110 1  
LOC143666 1  
LOC145474 1  
LOC145837 1  
LOC145845 1  
LOC148413 1  
LOC149950 1  
LOC150197 1  
LOC151009 1

|           |   |
|-----------|---|
| LOC152217 | 1 |
| LOC202781 | 1 |
| LOC220729 | 1 |
| LOC254896 | 1 |
| LOC256880 | 1 |
| LOC283403 | 1 |
| LOC283710 | 1 |
| LOC284023 | 1 |
| LOC284080 | 1 |
| LOC284294 | 1 |
| LOC284395 | 1 |
| LOC284454 | 1 |
| LOC284837 | 1 |
| LOC284865 | 1 |
| LOC284933 | 1 |
| LOC284950 | 1 |
| LOC284998 | 1 |
| LOC286059 | 1 |
| LOC286184 | 1 |
| LOC338739 | 1 |
| LOC338817 | 1 |
| LOC339622 | 1 |
| LOC339807 | 1 |
| LOC340515 | 1 |
| LOC375295 | 1 |
| LOC388152 | 1 |
| LOC388813 | 1 |
| LOC388849 | 1 |
| LOC390660 | 1 |
| LOC399753 | 1 |
| LOC400043 | 1 |
| LOC400084 | 1 |
| LOC401010 | 1 |
| LOC401052 | 1 |
| LOC402160 | 1 |
| LOC415056 | 1 |
| LOC440028 | 1 |
| LOC440896 | 1 |
| LOC441009 | 1 |
| LOC441242 | 1 |
| LOC574538 | 1 |
| LOC595101 | 1 |
| LOC642366 | 1 |

|           |   |
|-----------|---|
| LOC643542 | 1 |
| LOC643770 | 1 |
| LOC643802 | 1 |
| LOC644145 | 1 |
| LOC644936 | 1 |
| LOC645166 | 1 |
| LOC645638 | 1 |
| LOC646168 | 1 |
| LOC646278 | 1 |
| LOC646471 | 1 |
| LOC646743 | 1 |
| LOC646938 | 1 |
| LOC648691 | 1 |
| LOC652276 | 1 |
| LOC727849 | 1 |
| LOC728558 | 1 |
| LOC728613 | 1 |
| LOC728743 | 1 |
| LOC729059 | 1 |
| LOC729683 | 1 |
| LOC729739 | 1 |
| LOC730668 | 1 |
| LOC731223 | 1 |
| LOC93432  | 1 |
| LOC96610  | 1 |
| LOXL3     | 1 |
| LPCAT4    | 1 |
| LPP-AS2   | 1 |
| LPPR1     | 1 |
| LPXN      | 1 |
| LRFN2     | 1 |
| LRFN4     | 1 |
| LRIT1     | 1 |
| LRP11     | 1 |
| LRP5L     | 1 |
| LRRC16B   | 1 |
| LRRC24    | 1 |
| LRRC28    | 1 |
| LRRC3     | 1 |
| LRRC32    | 1 |
| LRRC36    | 1 |
| LRRC37BP1 | 1 |
| LRRC56    | 1 |

|          |   |
|----------|---|
| LRRC69   | 1 |
| LRWD1    | 1 |
| LSM10    | 1 |
| LSM7     | 1 |
| LSMD1    | 1 |
| LTBP2    | 1 |
| LTBP4    | 1 |
| LTC4S    | 1 |
| LY6D     | 1 |
| LY86     | 1 |
| LY86-AS1 | 1 |
| LYG1     | 1 |
| LYPD2    | 1 |
| LYPD6B   | 1 |
| LYSMD2   | 1 |
| LZTR1    | 1 |
| MAB21L1  | 1 |
| MAD2L1BP | 1 |
| MAF1     | 1 |
| MAFA     | 1 |
| MAFB     | 1 |
| MAFG-AS1 | 1 |
| MAFK     | 1 |
| MAGEA2B  | 1 |
| MAGEA3   | 1 |
| MALAT1   | 1 |
| MALSU1   | 1 |
| MAN1A2   | 1 |
| MAN2B2   | 1 |
| MAOB     | 1 |
| MAP1LC3A | 1 |
| MAP2K2   | 1 |
| MAP3K1   | 1 |
| MAP3K11  | 1 |
| MAP3K14  | 1 |
| MAP3K6   | 1 |
| MAP3K9   | 1 |
| MAPK15   | 1 |
| MAPK6    | 1 |
| MAPK8IP1 | 1 |
| MAPK8IP2 | 1 |
| MAPRE1   | 1 |
| MAPT-AS1 | 1 |



|           |   |
|-----------|---|
| MAPT-IT1  | 1 |
| MAST1     | 1 |
| MAT2A     | 1 |
| MBD5      | 1 |
| MBLAC2    | 1 |
| MBTD1     | 1 |
| MCCC1     | 1 |
| MCEE      | 1 |
| MCF2L-AS1 | 1 |
| MCF2L2    | 1 |
| MCOLN2    | 1 |
| MCU       | 1 |
| MDFI      | 1 |
| MDH2      | 1 |
| MDM2      | 1 |
| MECP2     | 1 |
| MED10     | 1 |
| MED12     | 1 |
| MED13L    | 1 |
| MED19     | 1 |
| MED31     | 1 |
| MEF2D     | 1 |
| MEG8      | 1 |
| MEGF9     | 1 |
| MEIS3P1   | 1 |
| MERTK     | 1 |
| METTL11B  | 1 |
| METTL14   | 1 |
| METTL2B   | 1 |
| MFAP5     | 1 |
| MFSD6L    | 1 |
| MFSD7     | 1 |
| MGAT1     | 1 |
| MGC39372  | 1 |
| MGC45800  | 1 |
| MGST1     | 1 |
| MICB      | 1 |
| MIP       | 1 |
| MIR101-2  | 1 |
| MIR106A   | 1 |
| MIR1184-1 | 1 |
| MIR1184-2 | 1 |
| MIR1184-3 | 1 |

|          |   |
|----------|---|
| MIR1204  | 1 |
| MIR1226  | 1 |
| MIR1227  | 1 |
| MIR1228  | 1 |
| MIR1237  | 1 |
| MIR1247  | 1 |
| MIR1252  | 1 |
| MIR1284  | 1 |
| MIR1296  | 1 |
| MIR1297  | 1 |
| MIR130A  | 1 |
| MIR1324  | 1 |
| MIR138-1 | 1 |
| MIR142   | 1 |
| MIR143HG | 1 |
| MIR146B  | 1 |
| MIR150   | 1 |
| MIR1538  | 1 |
| MIR181C  | 1 |
| MIR181D  | 1 |
| MIR183   | 1 |
| MIR18B   | 1 |
| MIR190B  | 1 |
| MIR193B  | 1 |
| MIR195   | 1 |
| MIR200A  | 1 |
| MIR200B  | 1 |
| MIR203   | 1 |
| MIR205   | 1 |
| MIR210   | 1 |
| MIR210HG | 1 |
| MIR219-2 | 1 |
| MIR23A   | 1 |
| MIR23B   | 1 |
| MIR24-1  | 1 |
| MIR24-2  | 1 |
| MIR2467  | 1 |
| MIR26B   | 1 |
| MIR27A   | 1 |
| MIR27B   | 1 |
| MIR2861  | 1 |
| MIR296   | 1 |
| MIR298   | 1 |

|           |   |
|-----------|---|
| MIR3074   | 1 |
| MIR3119-1 | 1 |
| MIR3124   | 1 |
| MIR3155B  | 1 |
| MIR3162   | 1 |
| MIR3165   | 1 |
| MIR3178   | 1 |
| MIR3180-1 | 1 |
| MIR3180-2 | 1 |
| MIR3180-3 | 1 |
| MIR3180-4 | 1 |
| MIR3180-5 | 1 |
| MIR3196   | 1 |
| MIR320A   | 1 |
| MIR320D2  | 1 |
| MIR328    | 1 |
| MIR335    | 1 |
| MIR338    | 1 |
| MIR345    | 1 |
| MIR3529   | 1 |
| MIR3545   | 1 |
| MIR3605   | 1 |
| MIR3615   | 1 |
| MIR3618   | 1 |
| MIR3620   | 1 |
| MIR3646   | 1 |
| MIR3678   | 1 |
| MIR378C   | 1 |
| MIR378D1  | 1 |
| MIR3912   | 1 |
| MIR3925   | 1 |
| MIR3938   | 1 |
| MIR3960   | 1 |
| MIR4251   | 1 |
| MIR4254   | 1 |
| MIR4257   | 1 |
| MIR4262   | 1 |
| MIR4264   | 1 |
| MIR4267   | 1 |
| MIR4277   | 1 |
| MIR4283-1 | 1 |
| MIR4283-2 | 1 |
| MIR429    | 1 |

|           |   |
|-----------|---|
| MIR4292   | 1 |
| MIR4294   | 1 |
| MIR4297   | 1 |
| MIR4303   | 1 |
| MIR4305   | 1 |
| MIR4321   | 1 |
| MIR4322   | 1 |
| MIR4429   | 1 |
| MIR4449   | 1 |
| MIR4453   | 1 |
| MIR4454   | 1 |
| MIR4469   | 1 |
| MIR4470   | 1 |
| MIR4472-1 | 1 |
| MIR4479   | 1 |
| MIR4489   | 1 |
| MIR4497   | 1 |
| MIR449C   | 1 |
| MIR4520A  | 1 |
| MIR4523   | 1 |
| MIR4633   | 1 |
| MIR4634   | 1 |
| MIR4637   | 1 |
| MIR4638   | 1 |
| MIR4645   | 1 |
| MIR4649   | 1 |
| MIR4655   | 1 |
| MIR4659A  | 1 |
| MIR4674   | 1 |
| MIR4687   | 1 |
| MIR4689   | 1 |
| MIR4691   | 1 |
| MIR4692   | 1 |
| MIR4703   | 1 |
| MIR4726   | 1 |
| MIR4730   | 1 |
| MIR4733   | 1 |
| MIR4739   | 1 |
| MIR4741   | 1 |
| MIR4744   | 1 |
| MIR4747   | 1 |
| MIR4750   | 1 |
| MIR4751   | 1 |

|           |   |
|-----------|---|
| MIR4758   | 1 |
| MIR4761   | 1 |
| MIR4766   | 1 |
| MIR4767   | 1 |
| MIR4769   | 1 |
| MIR4776-2 | 1 |
| MIR4777   | 1 |
| MIR4778   | 1 |
| MIR4781   | 1 |
| MIR4787   | 1 |
| MIR4792   | 1 |
| MIR4800   | 1 |
| MIR493    | 1 |
| MIR497    | 1 |
| MIR502    | 1 |
| MIR5088   | 1 |
| MIR5089   | 1 |
| MIR5091   | 1 |
| MIR548D2  | 1 |
| MIR548W   | 1 |
| MIR5580   | 1 |
| MIR5583-1 | 1 |
| MIR5690   | 1 |
| MIR5691   | 1 |
| MIR5703   | 1 |
| MIR593    | 1 |
| MIR602    | 1 |
| MIR647    | 1 |
| MIR655    | 1 |
| MIR658    | 1 |
| MIR661    | 1 |
| MIR662    | 1 |
| MIR663B   | 1 |
| MIR7-3    | 1 |
| MIR711    | 1 |
| MIR762    | 1 |
| MIR9-1    | 1 |
| MIR922    | 1 |
| MIR935    | 1 |
| MIR96     | 1 |
| MIRLET7I  | 1 |
| MIS18A    | 1 |
| MITD1     | 1 |

|           |   |
|-----------|---|
| MIXL1     | 1 |
| MKLN1     | 1 |
| MLLT1     | 1 |
| MLLT11    | 1 |
| MLLT3     | 1 |
| MLNR      | 1 |
| MLYCD     | 1 |
| MMAA      | 1 |
| MMD       | 1 |
| MMP15     | 1 |
| MMP17     | 1 |
| MMP2      | 1 |
| MMP23A    | 1 |
| MMP24     | 1 |
| MMRN2     | 1 |
| MMS19     | 1 |
| MNT       | 1 |
| MOAP1     | 1 |
| MOB3C     | 1 |
| MON1B     | 1 |
| MON2      | 1 |
| MORC2-AS1 | 1 |
| MORC3     | 1 |
| MORN2     | 1 |
| MORN5     | 1 |
| MPHOSPH8  | 1 |
| MPP6      | 1 |
| MPZ       | 1 |
| MRAP2     | 1 |
| MREG      | 1 |
| MRGPRE    | 1 |
| MRGPRG    | 1 |
| MROH2B    | 1 |
| MRPL16    | 1 |
| MRPL38    | 1 |
| MRPL41    | 1 |
| MRPL44    | 1 |
| MRPS10    | 1 |
| MRPS23    | 1 |
| MRPS27    | 1 |
| MRPS36    | 1 |
| MRPS7     | 1 |
| MSH3      | 1 |

|          |   |
|----------|---|
| MSL3     | 1 |
| MSRB3    | 1 |
| MST1     | 1 |
| MST4     | 1 |
| MSX2     | 1 |
| MT1IP    | 1 |
| MT4      | 1 |
| MTA2     | 1 |
| MTA3     | 1 |
| MTDH     | 1 |
| MTERF    | 1 |
| MTERFD2  | 1 |
| MTHFD1L  | 1 |
| MTMR4    | 1 |
| MTMR9LP  | 1 |
| MTPAP    | 1 |
| MTRNR2L3 | 1 |
| MTRNR2L4 | 1 |
| MTRNR2L7 | 1 |
| MTSS1L   | 1 |
| MUC16    | 1 |
| MUC17    | 1 |
| MUC2     | 1 |
| MUC5B    | 1 |
| MUC6     | 1 |
| MXD4     | 1 |
| MYBPC2   | 1 |
| MYC      | 1 |
| MYCN     | 1 |
| MYEF2    | 1 |
| MYEOV    | 1 |
| MYH16    | 1 |
| MYH7     | 1 |
| MYO16    | 1 |
| MYO5B    | 1 |
| MYO9A    | 1 |
| N4BP1    | 1 |
| NAA25    | 1 |
| NAA30    | 1 |
| NADK     | 1 |
| NADSYN1  | 1 |
| NAMPT    | 1 |
| NANOS1   | 1 |

|          |   |
|----------|---|
| NANOS3   | 1 |
| NANS     | 1 |
| NAP1L2   | 1 |
| NAPB     | 1 |
| NARFL    | 1 |
| NAT8     | 1 |
| NBEA     | 1 |
| NBEAL1   | 1 |
| NCALD    | 1 |
| NCAM2    | 1 |
| NCAPG2   | 1 |
| NCAPH    | 1 |
| NCBP1    | 1 |
| NCOA2    | 1 |
| NCOA7    | 1 |
| NDC80    | 1 |
| NDN      | 1 |
| NDNL2    | 1 |
| NDUFA4L2 | 1 |
| NDUFA7   | 1 |
| NDUFB10  | 1 |
| NDUFB9   | 1 |
| NDUFS1   | 1 |
| NDUFS3   | 1 |
| NDUFS8   | 1 |
| NECAB1   | 1 |
| NEDD4    | 1 |
| NEGR1    | 1 |
| NEK5     | 1 |
| NEK7     | 1 |
| NEUROD4  | 1 |
| NEUROG1  | 1 |
| NEUROG2  | 1 |
| NFE2L2   | 1 |
| NFIA     | 1 |
| NFKBIZ   | 1 |
| NFYC     | 1 |
| NGEF     | 1 |
| NGFR     | 1 |
| NGFRAP1  | 1 |
| NINJ1    | 1 |
| NINL     | 1 |
| NIPA1    | 1 |



|           |   |
|-----------|---|
| NIPAL3    | 1 |
| NIPSNAP1  | 1 |
| NIT2      | 1 |
| NKAPL     | 1 |
| NKX1-2    | 1 |
| NKX6-2    | 1 |
| NLGN2     | 1 |
| NLGN4X    | 1 |
| NLK       | 1 |
| NLRC3     | 1 |
| NLRP11    | 1 |
| NLRP4     | 1 |
| NMBR      | 1 |
| NMRK2     | 1 |
| NMUR2     | 1 |
| NOL11     | 1 |
| NOL3      | 1 |
| NOM1      | 1 |
| NOP10     | 1 |
| NOP14-AS1 | 1 |
| NOTCH1    | 1 |
| NOTCH4    | 1 |
| NPB       | 1 |
| NPEPPS    | 1 |
| NPHP4     | 1 |
| NPHS2     | 1 |
| NPPA-AS1  | 1 |
| NPTX1     | 1 |
| NPTX2     | 1 |
| NPY5R     | 1 |
| NR1D1     | 1 |
| NR2E1     | 1 |
| NR2F1     | 1 |
| NR2F6     | 1 |
| NRADDP    | 1 |
| NRARP     | 1 |
| NRAS      | 1 |
| NRBF2     | 1 |
| NRBP1     | 1 |
| NRF1      | 1 |
| NRL       | 1 |
| NRN1      | 1 |
| NRXN2     | 1 |

|         |   |
|---------|---|
| NT5DC3  | 1 |
| NTF4    | 1 |
| NTHL1   | 1 |
| NTSR1   | 1 |
| NUAK1   | 1 |
| NUDT11  | 1 |
| NUDT18  | 1 |
| NUDT9P1 | 1 |
| NUP160  | 1 |
| NUP210  | 1 |
| NUP214  | 1 |
| NUP50   | 1 |
| NUTF2   | 1 |
| NXF4    | 1 |
| NXNL1   | 1 |
| NXPH4   | 1 |
| NXT2    | 1 |
| NYAP1   | 1 |
| NYNRIN  | 1 |
| OAS2    | 1 |
| OAZ1    | 1 |
| OBFC1   | 1 |
| OBP2B   | 1 |
| OCLN    | 1 |
| ODF2    | 1 |
| ODF3L1  | 1 |
| OLFM2   | 1 |
| OLIG2   | 1 |
| ONECUT3 | 1 |
| OPCML   | 1 |
| OPN1MW  | 1 |
| OPN1MW2 | 1 |
| OPRD1   | 1 |
| OR13J1  | 1 |
| OR14A16 | 1 |
| OR1D4   | 1 |
| OR1D5   | 1 |
| OR2AE1  | 1 |
| OR2AG1  | 1 |
| OR2K2   | 1 |
| OR2T8   | 1 |
| OR3A3   | 1 |
| OR4F17  | 1 |

|          |   |
|----------|---|
| OR4F4    | 1 |
| OR4F5    | 1 |
| OR4K5    | 1 |
| OR51F2   | 1 |
| OR52B2   | 1 |
| OR5R1    | 1 |
| OR6B1    | 1 |
| OR6W1P   | 1 |
| OR7C1    | 1 |
| OR7G3    | 1 |
| OR9G4    | 1 |
| ORM1     | 1 |
| ORM2     | 1 |
| OSBP     | 1 |
| OSBPL7   | 1 |
| OSTF1    | 1 |
| OSTM1    | 1 |
| OTOP2    | 1 |
| OTUD1    | 1 |
| OVOL2    | 1 |
| P2RX6P   | 1 |
| P2RY4    | 1 |
| P4HB     | 1 |
| PABPC3   | 1 |
| PACS1    | 1 |
| PACSIN2  | 1 |
| PADI2    | 1 |
| PAFAH1B1 | 1 |
| PAG1     | 1 |
| PAK1IP1  | 1 |
| PAK2     | 1 |
| PALD1    | 1 |
| PAN3     | 1 |
| PANK2    | 1 |
| PAQR5    | 1 |
| PAQR9    | 1 |
| PARP10   | 1 |
| PARP16   | 1 |
| PCDH12   | 1 |
| PCDH18   | 1 |
| PCIF1    | 1 |
| PCNA-AS1 | 1 |
| PCNXL3   | 1 |

|          |   |
|----------|---|
| PCSK7    | 1 |
| PDCD1    | 1 |
| PDCL     | 1 |
| PDDC1    | 1 |
| PDE2A    | 1 |
| PDE3B    | 1 |
| PDE4C    | 1 |
| PDE7A    | 1 |
| PDGFB    | 1 |
| PDGFRA   | 1 |
| PDGFRB   | 1 |
| PDIA3    | 1 |
| PDIA6    | 1 |
| PDLIM2   | 1 |
| PDRG1    | 1 |
| PDXP     | 1 |
| PDZD4    | 1 |
| PEAK1    | 1 |
| PEG3     | 1 |
| PEG3-AS1 | 1 |
| PES1     | 1 |
| PEX5     | 1 |
| PFDN2    | 1 |
| PFKFB3   | 1 |
| PFN3     | 1 |
| PGCP1    | 1 |
| PGLYRP1  | 1 |
| PGM5-AS1 | 1 |
| PGP      | 1 |
| PGPEP1L  | 1 |
| PGRMC1   | 1 |
| PHACTR4  | 1 |
| PHF2     | 1 |
| PHF21B   | 1 |
| PHF23    | 1 |
| PHGDH    | 1 |
| PHLDA2   | 1 |
| PI4K2B   | 1 |
| PIAS4    | 1 |
| PIEZO2   | 1 |
| PIGH     | 1 |
| PIGM     | 1 |
| PIGP     | 1 |

|          |   |
|----------|---|
| PIGY     | 1 |
| PIK3CB   | 1 |
| PIK3CD   | 1 |
| PIM3     | 1 |
| PINK1    | 1 |
| PINX1    | 1 |
| PIP5K1B  | 1 |
| PIP5KL1  | 1 |
| PIPSL    | 1 |
| PIR-FIGF | 1 |
| PITPNA   | 1 |
| PIWIL2   | 1 |
| PKD1P1   | 1 |
| PKN2     | 1 |
| PKNOX2   | 1 |
| PLA2G12A | 1 |
| PLA2G2E  | 1 |
| PLA2G4B  | 1 |
| PLA2G4E  | 1 |
| PLAC9    | 1 |
| PLCB4    | 1 |
| PLCE1    | 1 |
| PLCL2    | 1 |
| PLCXD1   | 1 |
| PLD4     | 1 |
| PLEKHA2  | 1 |
| PLEKHA7  | 1 |
| PLEKHG3  | 1 |
| PLEKHM2  | 1 |
| PLEKHO1  | 1 |
| PLIN4    | 1 |
| PLOD3    | 1 |
| PLXND1   | 1 |
| PMEPA1   | 1 |
| PMM1     | 1 |
| PMM2     | 1 |
| PMPCB    | 1 |
| PMS2L2   | 1 |
| PNMA2    | 1 |
| PNO1     | 1 |
| PNOC     | 1 |
| PNPLA2   | 1 |
| PODXL2   | 1 |

|            |   |
|------------|---|
| POLE3      | 1 |
| POLK       | 1 |
| POLR3F     | 1 |
| POLRMT     | 1 |
| POM121L10P | 1 |
| POMGNT1    | 1 |
| POP7       | 1 |
| POR        | 1 |
| POTEF      | 1 |
| POTEH      | 1 |
| POTEM      | 1 |
| POU5F1P3   | 1 |
| POU6F1     | 1 |
| PPA1       | 1 |
| PPAN       | 1 |
| PPCDC      | 1 |
| PPDPF      | 1 |
| PPIA       | 1 |
| PPID       | 1 |
| PPIF       | 1 |
| PPL        | 1 |
| PPM1K      | 1 |
| PPM1M      | 1 |
| PPP1R14B   | 1 |
| PPP1R15B   | 1 |
| PPP1R16A   | 1 |
| PPP1R18    | 1 |
| PPP1R1A    | 1 |
| PPP1R1B    | 1 |
| PPP1R3C    | 1 |
| PPP1R3D    | 1 |
| PPP1R42    | 1 |
| PPP1R7     | 1 |
| PPP1R9B    | 1 |
| PPP2R2C    | 1 |
| PPP3R2     | 1 |
| PPP4R2     | 1 |
| PRAF2      | 1 |
| PRDM11     | 1 |
| PRDM2      | 1 |
| PRDM5      | 1 |
| PRDX2      | 1 |
| PRDX6      | 1 |

|            |   |
|------------|---|
| PRG3       | 1 |
| PRICKLE3   | 1 |
| PRKACB     | 1 |
| PRKAG2-AS1 | 1 |
| PRKCZ      | 1 |
| PRKG1      | 1 |
| PRKRIR     | 1 |
| PRLH       | 1 |
| PRM3       | 1 |
| PRMT10     | 1 |
| PRPF38A    | 1 |
| PRR18      | 1 |
| PRR19      | 1 |
| PRR20B     | 1 |
| PRR20D     | 1 |
| PRR20E     | 1 |
| PRRT3      | 1 |
| PRSS22     | 1 |
| PRSS38     | 1 |
| PRSS41     | 1 |
| PSCA       | 1 |
| PSG9       | 1 |
| PSMA1      | 1 |
| PSMB9      | 1 |
| PSMC6      | 1 |
| PSMD6      | 1 |
| PSPH       | 1 |
| PTCD1      | 1 |
| PTCD2      | 1 |
| PTEN       | 1 |
| PTGER2     | 1 |
| PTGER4     | 1 |
| PTGES      | 1 |
| PTGES3     | 1 |
| PTGR1      | 1 |
| PTK2B      | 1 |
| PTMS       | 1 |
| PTOV1      | 1 |
| PTOV1-AS1  | 1 |
| PTPLAD1    | 1 |
| PTPLAD2    | 1 |
| PTPN1      | 1 |
| PTPRA      | 1 |

|           |   |
|-----------|---|
| PTPRG     | 1 |
| PTRF      | 1 |
| PTRH1     | 1 |
| PURB      | 1 |
| PURG      | 1 |
| PVRL3-AS1 | 1 |
| PWRN1     | 1 |
| PXDC1     | 1 |
| PYCRL     | 1 |
| PYURF     | 1 |
| QARS      | 1 |
| QRFP      | 1 |
| RAB10     | 1 |
| RAB11FIP4 | 1 |
| RAB12     | 1 |
| RAB13     | 1 |
| RAB15     | 1 |
| RAB23     | 1 |
| RAB26     | 1 |
| RAB38     | 1 |
| RAB39A    | 1 |
| RAB3A     | 1 |
| RAB3D     | 1 |
| RAB5A     | 1 |
| RAC3      | 1 |
| RAD18     | 1 |
| RAD21-AS1 | 1 |
| RAD9B     | 1 |
| RADIL     | 1 |
| RALA      | 1 |
| RALBP1    | 1 |
| RANBP17   | 1 |
| RASA3     | 1 |
| RASGEF1A  | 1 |
| RASGEF1C  | 1 |
| RASGRP2   | 1 |
| RASL10B   | 1 |
| RASL11B   | 1 |
| RASL12    | 1 |
| RASSF10   | 1 |
| RASSF2    | 1 |
| RBBP9     | 1 |
| RBKS      | 1 |



|           |   |
|-----------|---|
| RBM12B    | 1 |
| RBM20     | 1 |
| RBM46     | 1 |
| RBM48     | 1 |
| RBP3      | 1 |
| RBP5      | 1 |
| RBPJL     | 1 |
| RCOR1     | 1 |
| RCOR2     | 1 |
| RCOR3     | 1 |
| RDBP      | 1 |
| RECQL4    | 1 |
| REEP4     | 1 |
| RELB      | 1 |
| RENBP     | 1 |
| RESP18    | 1 |
| REV3L     | 1 |
| RFNG      | 1 |
| RFX4      | 1 |
| RFX7      | 1 |
| RGP1      | 1 |
| RGPD5     | 1 |
| RGS1      | 1 |
| RGS2      | 1 |
| RHBDL1    | 1 |
| RHBDL3    | 1 |
| RHO       | 1 |
| RHOF      | 1 |
| RHOV      | 1 |
| RHOXF1    | 1 |
| RHPN1     | 1 |
| RIMBP3    | 1 |
| RIMBP3B   | 1 |
| RIMBP3C   | 1 |
| RIMS1     | 1 |
| RING1     | 1 |
| RINT1     | 1 |
| RIOK1     | 1 |
| RIOK3     | 1 |
| RLN3      | 1 |
| RLTPR     | 1 |
| RNA45S5   | 1 |
| RNA5SP411 | 1 |

|          |   |
|----------|---|
| RNASE7   | 1 |
| RNF112   | 1 |
| RNF114   | 1 |
| RNF123   | 1 |
| RNF149   | 1 |
| RNF151   | 1 |
| RNF175   | 1 |
| RNF181   | 1 |
| RNF182   | 1 |
| RNF186   | 1 |
| RNF207   | 1 |
| RNF214   | 1 |
| RNF215   | 1 |
| RNF223   | 1 |
| RNFT1    | 1 |
| RNMTL1   | 1 |
| RNU11    | 1 |
| RNU6-19  | 1 |
| RNU6-6   | 1 |
| RNU6-81  | 1 |
| ROBO3    | 1 |
| ROCK1    | 1 |
| ROMO1    | 1 |
| ROR2     | 1 |
| RP1L1    | 1 |
| RP2      | 1 |
| RP9P     | 1 |
| RPL18A   | 1 |
| RPL22L1  | 1 |
| RPL23A   | 1 |
| RPL23P8  | 1 |
| RPL4     | 1 |
| RPL7     | 1 |
| RPL7A    | 1 |
| RPLP0P2  | 1 |
| RPPH1    | 1 |
| RPS15    | 1 |
| RPS16    | 1 |
| RPS19    | 1 |
| RPS19BP1 | 1 |
| RPS25    | 1 |
| RPS28    | 1 |
| RPS6KA3  | 1 |

|           |   |
|-----------|---|
| RPUSD2    | 1 |
| RRAS2     | 1 |
| RRP1      | 1 |
| RRP36     | 1 |
| RSBN1     | 1 |
| RSF1      | 1 |
| RSPH1     | 1 |
| RSPH3     | 1 |
| RTKN2     | 1 |
| RTN4R     | 1 |
| RTN4RL1   | 1 |
| RTP3      | 1 |
| RTP4      | 1 |
| RUFY4     | 1 |
| RXFP4     | 1 |
| S100A14   | 1 |
| S100P     | 1 |
| SAA3P     | 1 |
| SAFB2     | 1 |
| SAMD15    | 1 |
| SAMD5     | 1 |
| SAMD9L    | 1 |
| SAP18     | 1 |
| SAPCD2    | 1 |
| SASH3     | 1 |
| SAT2      | 1 |
| SATB2-AS1 | 1 |
| SBDS      | 1 |
| SBSPON    | 1 |
| SCAF8     | 1 |
| SCARA5    | 1 |
| SCARNA27  | 1 |
| SCCPDH    | 1 |
| SCD5      | 1 |
| SCGB2B2   | 1 |
| SCN2B     | 1 |
| SCOC      | 1 |
| SCTR      | 1 |
| SCUBE1    | 1 |
| SCUBE3    | 1 |
| SCXA      | 1 |
| SCXB      | 1 |
| SCYL2     | 1 |

|            |   |
|------------|---|
| SDC1       | 1 |
| SDC3       | 1 |
| SDE2       | 1 |
| SDHAP1     | 1 |
| SDHAP2     | 1 |
| SDSL       | 1 |
| SEC14L6    | 1 |
| SEC1P      | 1 |
| SEC24B-AS1 | 1 |
| SEC24D     | 1 |
| SEC61B     | 1 |
| SECTM1     | 1 |
| SELE       | 1 |
| SELPLG     | 1 |
| SEMA5A     | 1 |
| SERPINA12  | 1 |
| SERPINA3   | 1 |
| SERPINA7   | 1 |
| SESN3      | 1 |
| SETD1B     | 1 |
| SETD7      | 1 |
| SETD8      | 1 |
| SF3A2      | 1 |
| SFMBT1     | 1 |
| SFMBT2     | 1 |
| SFT2D2     | 1 |
| SFXN2      | 1 |
| SFXN3      | 1 |
| SFXN4      | 1 |
| SGK2       | 1 |
| SGSH       | 1 |
| SGSM3      | 1 |
| SH2B3      | 1 |
| SH2D4A     | 1 |
| SH3BGR     | 1 |
| SH3BGRL2   | 1 |
| SH3PXD2A   | 1 |
| SH3RF3-AS1 | 1 |
| SHANK1     | 1 |
| SHANK2     | 1 |
| SHANK3     | 1 |
| SHC2       | 1 |
| SHMT2      | 1 |

|          |   |
|----------|---|
| SIAH1    | 1 |
| SIAH3    | 1 |
| SIDT2    | 1 |
| SIGLEC14 | 1 |
| SIGLEC5  | 1 |
| SIK3     | 1 |
| SIMC1    | 1 |
| SIN3B    | 1 |
| SIRT7    | 1 |
| SIT1     | 1 |
| SKI      | 1 |
| SLAIN2   | 1 |
| SLAMF8   | 1 |
| SLBP     | 1 |
| SLC10A1  | 1 |
| SLC10A4  | 1 |
| SLC11A2  | 1 |
| SLC12A4  | 1 |
| SLC12A7  | 1 |
| SLC15A4  | 1 |
| SLC16A10 | 1 |
| SLC16A11 | 1 |
| SLC17A7  | 1 |
| SLC17A9  | 1 |
| SLC1A1   | 1 |
| SLC1A6   | 1 |
| SLC22A11 | 1 |
| SLC22A15 | 1 |
| SLC22A18 | 1 |
| SLC22A24 | 1 |
| SLC22A31 | 1 |
| SLC22A5  | 1 |
| SLC25A2  | 1 |
| SLC25A28 | 1 |
| SLC25A33 | 1 |
| SLC25A35 | 1 |
| SLC25A37 | 1 |
| SLC25A40 | 1 |
| SLC25A47 | 1 |
| SLC27A3  | 1 |
| SLC2A10  | 1 |
| SLC2A13  | 1 |
| SLC2A14  | 1 |

|          |   |
|----------|---|
| SLC30A3  | 1 |
| SLC30A4  | 1 |
| SLC30A9  | 1 |
| SLC32A1  | 1 |
| SLC34A1  | 1 |
| SLC35B1  | 1 |
| SLC35D3  | 1 |
| SLC35E1  | 1 |
| SLC35F1  | 1 |
| SLC35F2  | 1 |
| SLC35F4  | 1 |
| SLC36A1  | 1 |
| SLC36A2  | 1 |
| SLC38A2  | 1 |
| SLC38A8  | 1 |
| SLC39A5  | 1 |
| SLC40A1  | 1 |
| SLC44A2  | 1 |
| SLC45A3  | 1 |
| SLC48A1  | 1 |
| SLC51A   | 1 |
| SLC5A11  | 1 |
| SLC5A4   | 1 |
| SLC6A1   | 1 |
| SLC6A17  | 1 |
| SLC6A2   | 1 |
| SLC7A1   | 1 |
| SLC7A2   | 1 |
| SLC7A5P1 | 1 |
| SLC7A5P2 | 1 |
| SLC9A2   | 1 |
| SLC9A3R1 | 1 |
| SLC9C1   | 1 |
| SLCO2B1  | 1 |
| SLCO4A1  | 1 |
| SLIT1    | 1 |
| SLK      | 1 |
| SLMAP    | 1 |
| SMARCC1  | 1 |
| SMARCD3  | 1 |
| SMCHD1   | 1 |
| SMG1     | 1 |
| SMG7-AS1 | 1 |

|             |   |
|-------------|---|
| SMIM7       | 1 |
| SMO         | 1 |
| SMPD3       | 1 |
| SMYD4       | 1 |
| SNAI3       | 1 |
| SNCG        | 1 |
| SNED1       | 1 |
| SNHG6       | 1 |
| SNORA26     | 1 |
| SNORA37     | 1 |
| SNORA6      | 1 |
| SNORA65     | 1 |
| SNORA75     | 1 |
| SNORA78     | 1 |
| SNORD105    | 1 |
| SNORD105B   | 1 |
| SNORD115-15 | 1 |
| SNORD115-2  | 1 |
| SNORD115-20 | 1 |
| SNORD115-21 | 1 |
| SNORD115-32 | 1 |
| SNORD116-3  | 1 |
| SNORD116-5  | 1 |
| SNORD116-7  | 1 |
| SNORD116-9  | 1 |
| SNORD18A    | 1 |
| SNORD20     | 1 |
| SNORD29     | 1 |
| SNORD32B    | 1 |
| SNORD36A    | 1 |
| SNORD36B    | 1 |
| SNORD36C    | 1 |
| SNORD49B    | 1 |
| SNORD68     | 1 |
| SNORD84     | 1 |
| SNORD88A    | 1 |
| SNORD88B    | 1 |
| SNRK-AS1    | 1 |
| SNRNP200    | 1 |
| SNRNP70     | 1 |
| SNRPD3      | 1 |
| SNRPF       | 1 |
| SNTB2       | 1 |

|           |   |
|-----------|---|
| SNTG1     | 1 |
| SNTG2     | 1 |
| SNX10     | 1 |
| SNX19     | 1 |
| SNX25     | 1 |
| SNX29P1   | 1 |
| SNX31     | 1 |
| SNX32     | 1 |
| SOBP      | 1 |
| SOCS2-AS1 | 1 |
| SOWAHD    | 1 |
| SOX3      | 1 |
| SOX7      | 1 |
| SOX8      | 1 |
| SOX9      | 1 |
| SP140     | 1 |
| SP140L    | 1 |
| SP5       | 1 |
| SP6       | 1 |
| SPA17     | 1 |
| SPAG17    | 1 |
| SPATA3    | 1 |
| SPATA32   | 1 |
| SPECC1    | 1 |
| SPG21     | 1 |
| SPHK1     | 1 |
| SPIN1     | 1 |
| SPNS2     | 1 |
| SPOCK1    | 1 |
| SPR       | 1 |
| SPRED2    | 1 |
| SPRR2F    | 1 |
| SPRR4     | 1 |
| SPRY1     | 1 |
| SPRY2     | 1 |
| SPTBN1    | 1 |
| SPTSSA    | 1 |
| SQLE      | 1 |
| SQRDL     | 1 |
| SRD5A1    | 1 |
| SRF       | 1 |
| SRRD      | 1 |
| SRRM4     | 1 |



|               |   |
|---------------|---|
| SRXN1         | 1 |
| SSB           | 1 |
| SSH3          | 1 |
| SSR4P1        | 1 |
| SSTR2         | 1 |
| SSTR4         | 1 |
| ST13          | 1 |
| ST3GAL5       | 1 |
| ST3GAL6-AS1   | 1 |
| ST5           | 1 |
| ST6GALNAC6    | 1 |
| ST8SIA2       | 1 |
| ST8SIA6       | 1 |
| STAB1         | 1 |
| STAG3L1       | 1 |
| STAG3L2       | 1 |
| STAG3L3       | 1 |
| STARD8        | 1 |
| STAT5A        | 1 |
| STAT6         | 1 |
| STC2          | 1 |
| STIM1         | 1 |
| STK17A        | 1 |
| STK17B        | 1 |
| STK32C        | 1 |
| STON1-GTF2A11 | 1 |
| STRN          | 1 |
| STX6          | 1 |
| STXBP6        | 1 |
| SUCLA2        | 1 |
| SULT4A1       | 1 |
| SUMO3         | 1 |
| SURF2         | 1 |
| SURF4         | 1 |
| SURF6         | 1 |
| SUSD2         | 1 |
| SUSD5         | 1 |
| SUV420H2      | 1 |
| SVEP1         | 1 |
| SYCN          | 1 |
| SYNE4         | 1 |
| SYNJ2         | 1 |
| SYNPO         | 1 |

|             |   |
|-------------|---|
| SYT3        | 1 |
| SYT4        | 1 |
| SYT6        | 1 |
| SYT8        | 1 |
| TAAR2       | 1 |
| TAB2        | 1 |
| TACC3       | 1 |
| TAF7L       | 1 |
| TAL1        | 1 |
| TANGO2      | 1 |
| TAP1        | 1 |
| TAPT1       | 1 |
| TARBP2      | 1 |
| TAS2R13     | 1 |
| TASP1       | 1 |
| TBC1D16     | 1 |
| TBC1D3P1-DH | 1 |
| TBKBP1      | 1 |
| TBL1X       | 1 |
| TBL2        | 1 |
| TBPL2       | 1 |
| TBX19       | 1 |
| TBX2        | 1 |
| TBX5-AS1    | 1 |
| TC2N        | 1 |
| TCAIM       | 1 |
| TCAP        | 1 |
| TCEA3       | 1 |
| TCEAL2      | 1 |
| TCEAL5      | 1 |
| TCEANC      | 1 |
| TCEANC2     | 1 |
| TCF3        | 1 |
| TCL1B       | 1 |
| TCP11L2     | 1 |
| TCTE3       | 1 |
| TEAD2       | 1 |
| TEAD3       | 1 |
| TEF         | 1 |
| TEKT4       | 1 |
| TENM4       | 1 |
| TEP1        | 1 |
| TES         | 1 |

|          |   |
|----------|---|
| TESK2    | 1 |
| TET2     | 1 |
| TEX22    | 1 |
| TFAMP1   | 1 |
| TFAP2C   | 1 |
| TFAP4    | 1 |
| TFB2M    | 1 |
| TFCP2L1  | 1 |
| TFF1     | 1 |
| TFR2     | 1 |
| TG       | 1 |
| TGM4     | 1 |
| THAP11   | 1 |
| THAP2    | 1 |
| THAP8    | 1 |
| THBD     | 1 |
| THBS1    | 1 |
| THEM6    | 1 |
| TIAM2    | 1 |
| TIMELESS | 1 |
| TIMMDC1  | 1 |
| TIMP3    | 1 |
| TIMP4    | 1 |
| TJP2     | 1 |
| TK1      | 1 |
| TLE1     | 1 |
| TLE4     | 1 |
| TLX1NB   | 1 |
| TM4SF5   | 1 |
| TM6SF2   | 1 |
| TMC6     | 1 |
| TMC8     | 1 |
| TMCO6    | 1 |
| TMED1    | 1 |
| TMED10   | 1 |
| TMED3    | 1 |
| TMED4    | 1 |
| TMEM104  | 1 |
| TMEM119  | 1 |
| TMEM120B | 1 |
| TMEM121  | 1 |
| TMEM125  | 1 |
| TMEM128  | 1 |

|             |   |
|-------------|---|
| TMEM131     | 1 |
| TMEM132C    | 1 |
| TMEM132E    | 1 |
| TMEM151A    | 1 |
| TMEM154     | 1 |
| TMEM161B    | 1 |
| TMEM163     | 1 |
| TMEM17      | 1 |
| TMEM170B    | 1 |
| TMEM175     | 1 |
| TMEM176A    | 1 |
| TMEM179     | 1 |
| TMEM179B    | 1 |
| TMEM181     | 1 |
| TMEM185B    | 1 |
| TMEM187     | 1 |
| TMEM202     | 1 |
| TMEM211     | 1 |
| TMEM220-AS1 | 1 |
| TMEM221     | 1 |
| TMEM229A    | 1 |
| TMEM239     | 1 |
| TMEM253     | 1 |
| TMEM38A     | 1 |
| TMEM38B     | 1 |
| TMEM43      | 1 |
| TMEM50A     | 1 |
| TMEM52      | 1 |
| TMEM54      | 1 |
| TMEM65      | 1 |
| TMEM74B     | 1 |
| TMEM8A      | 1 |
| TMEM91      | 1 |
| TMIGD1      | 1 |
| TMOD1       | 1 |
| TMPRSS12    | 1 |
| TMPRSS9     | 1 |
| TMSB10      | 1 |
| TMSB4X      | 1 |
| TMTC2       | 1 |
| TNFAIP8     | 1 |
| TNFSF10     | 1 |
| TNNI1       | 1 |

|          |   |
|----------|---|
| TNRC6A   | 1 |
| TOB1     | 1 |
| TOB2     | 1 |
| TOM1L1   | 1 |
| TOMM22   | 1 |
| TOMM70A  | 1 |
| TOP3B    | 1 |
| TOR1AIP2 | 1 |
| TOR1B    | 1 |
| TOR4A    | 1 |
| TOX2     | 1 |
| TOX4     | 1 |
| TP53I11  | 1 |
| TP53INP2 | 1 |
| TP53TG3D | 1 |
| TPBG     | 1 |
| TPM3P9   | 1 |
| TPMT     | 1 |
| TPP1     | 1 |
| TPRG1    | 1 |
| TPRG1L   | 1 |
| TPRN     | 1 |
| TPRX1    | 1 |
| TPSAB1   | 1 |
| TPST1    | 1 |
| TPTEP1   | 1 |
| TRABD2B  | 1 |
| TRADD    | 1 |
| TRAF1    | 1 |
| TRAF2    | 1 |
| TRAF5    | 1 |
| TRAF7    | 1 |
| TRAM1L1  | 1 |
| TRAPPC2L | 1 |
| TRAPPC8  | 1 |
| TREML4   | 1 |
| TRH      | 1 |
| TRHDE    | 1 |
| TRIM28   | 1 |
| TRIM29   | 1 |
| TRIM40   | 1 |
| TRIM49   | 1 |
| TRIM49C  | 1 |

|          |   |
|----------|---|
| TRIM49L1 | 1 |
| TRIM72   | 1 |
| TRIM9    | 1 |
| TRMT1    | 1 |
| TRMT112  | 1 |
| TRMT61A  | 1 |
| TRNP1    | 1 |
| TRNT1    | 1 |
| TRPA1    | 1 |
| TRPM6    | 1 |
| TRPV2    | 1 |
| TSEN34   | 1 |
| TSKS     | 1 |
| TSPAN11  | 1 |
| TSPAN2   | 1 |
| TSPAN32  | 1 |
| TSPYL6   | 1 |
| TSR1     | 1 |
| TSSK1B   | 1 |
| TTC16    | 1 |
| TTC29    | 1 |
| TTC32    | 1 |
| TTC34    | 1 |
| TTC39A   | 1 |
| TTC7B    | 1 |
| TTLL10   | 1 |
| TTLL2    | 1 |
| TTLL7    | 1 |
| TTLL9    | 1 |
| TTN      | 1 |
| TUBA1B   | 1 |
| TUBA3FP  | 1 |
| TUBA4B   | 1 |
| TUBB     | 1 |
| TUBB1    | 1 |
| TUBB2A   | 1 |
| TUBGCP4  | 1 |
| TUBGCP6  | 1 |
| TULP2    | 1 |
| TUSC2    | 1 |
| TUT1     | 1 |
| TXNRD1   | 1 |
| UBA1     | 1 |

|             |   |
|-------------|---|
| UBAC1       | 1 |
| UBALD1      | 1 |
| UBE2E3      | 1 |
| UBE2M       | 1 |
| UBE2Q2P2    | 1 |
| UBE2Q2P3    | 1 |
| UBE2S       | 1 |
| UBE3D       | 1 |
| UBIAD1      | 1 |
| UBL3        | 1 |
| UBL4B       | 1 |
| UBN1        | 1 |
| UBXN11      | 1 |
| UCA1        | 1 |
| UCN         | 1 |
| UFSP1       | 1 |
| ULK1        | 1 |
| ULK4P1      | 1 |
| ULK4P2      | 1 |
| ULK4P3      | 1 |
| UNC119B     | 1 |
| UNC93B1     | 1 |
| UPK1A       | 1 |
| UPK1A-AS1   | 1 |
| UPK2        | 1 |
| UPP2        | 1 |
| UQCR11      | 1 |
| UQCRH       | 1 |
| URB1        | 1 |
| URGCP-MRPS2 | 1 |
| UROS        | 1 |
| USP25       | 1 |
| USP35       | 1 |
| USP39       | 1 |
| USP45       | 1 |
| USP51       | 1 |
| USP54       | 1 |
| USP7        | 1 |
| UST         | 1 |
| UTP15       | 1 |
| UTP20       | 1 |
| UTS2R       | 1 |
| UVRAG       | 1 |

|          |   |
|----------|---|
| UVSSA    | 1 |
| VAC14    | 1 |
| VAMP3    | 1 |
| VASN     | 1 |
| VAV3     | 1 |
| VAX2     | 1 |
| VEGFC    | 1 |
| VILL     | 1 |
| VIPR2    | 1 |
| VPREB3   | 1 |
| VPS35    | 1 |
| VPS37D   | 1 |
| VRTN     | 1 |
| VSIG10   | 1 |
| VSTM2A   | 1 |
| VSTM2L   | 1 |
| VSTM5    | 1 |
| VTA1     | 1 |
| VTRNA2-1 | 1 |
| VWA3B    | 1 |
| WAC-AS1  | 1 |
| WASH1    | 1 |
| WASH2P   | 1 |
| WASH3P   | 1 |
| WASH5P   | 1 |
| WASH7P   | 1 |
| WBP1     | 1 |
| WBSCR17  | 1 |
| WDR18    | 1 |
| WDR3     | 1 |
| WDR36    | 1 |
| WDR37    | 1 |
| WDR38    | 1 |
| WDR4     | 1 |
| WDR5     | 1 |
| WDR52    | 1 |
| WDR53    | 1 |
| WDR6     | 1 |
| WDR70    | 1 |
| WDR77    | 1 |
| WDR85    | 1 |
| WDR86    | 1 |
| WDR87    | 1 |



|         |   |
|---------|---|
| WEE1    | 1 |
| WFDC1   | 1 |
| WFIKKN2 | 1 |
| WHSC1   | 1 |
| WIF1    | 1 |
| WIPF1   | 1 |
| WNT16   | 1 |
| WNT3    | 1 |
| WNT5A   | 1 |
| WNT6    | 1 |
| WNT7B   | 1 |
| WRAP73  | 1 |
| WRB     | 1 |
| WRN     | 1 |
| WSB2    | 1 |
| WSCD1   | 1 |
| WTIP    | 1 |
| WWOX    | 1 |
| XKR4    | 1 |
| XKR6    | 1 |
| XPO1    | 1 |
| XPO4    | 1 |
| XPO5    | 1 |
| XRCC1   | 1 |
| XYLT1   | 1 |
| XYLT2   | 1 |
| YAE1D1  | 1 |
| YARS2   | 1 |
| YEATS4  | 1 |
| YIPF3   | 1 |
| YPEL1   | 1 |
| YRDC    | 1 |
| YTHDF1  | 1 |
| YWHAH   | 1 |
| YWHAZ   | 1 |
| YY1     | 1 |
| ZAK     | 1 |
| ZBED3   | 1 |
| ZBED4   | 1 |
| ZBTB2   | 1 |
| ZBTB20  | 1 |
| ZBTB25  | 1 |
| ZBTB26  | 1 |

|           |   |
|-----------|---|
| ZBTB3     | 1 |
| ZBTB42    | 1 |
| ZBTB7A    | 1 |
| ZBTB7C    | 1 |
| ZBTB8B    | 1 |
| ZBTB8OS   | 1 |
| ZC3H3     | 1 |
| ZC3H4     | 1 |
| ZCCHC2    | 1 |
| ZCRB1     | 1 |
| ZDHHC11   | 1 |
| ZDHHC12   | 1 |
| ZDHHC20   | 1 |
| ZDHHC24   | 1 |
| ZFC3H1    | 1 |
| ZFHX2     | 1 |
| ZFHX4-AS1 | 1 |
| ZFP36L2   | 1 |
| ZFP82     | 1 |
| ZFP92     | 1 |
| ZFPL1     | 1 |
| ZFPM1     | 1 |
| ZFX-AS1   | 1 |
| ZKSCAN2   | 1 |
| ZMYND19   | 1 |
| ZNF121    | 1 |
| ZNF141    | 1 |
| ZNF167    | 1 |
| ZNF214    | 1 |
| ZNF256    | 1 |
| ZNF263    | 1 |
| ZNF281    | 1 |
| ZNF319    | 1 |
| ZNF333    | 1 |
| ZNF33B    | 1 |
| ZNF34     | 1 |
| ZNF362    | 1 |
| ZNF366    | 1 |
| ZNF367    | 1 |
| ZNF385C   | 1 |
| ZNF385D   | 1 |
| ZNF391    | 1 |
| ZNF398    | 1 |

|            |   |
|------------|---|
| ZNF434     | 1 |
| ZNF436     | 1 |
| ZNF439     | 1 |
| ZNF440     | 1 |
| ZNF471     | 1 |
| ZNF480     | 1 |
| ZNF488     | 1 |
| ZNF500     | 1 |
| ZNF511     | 1 |
| ZNF512B    | 1 |
| ZNF525     | 1 |
| ZNF540     | 1 |
| ZNF565     | 1 |
| ZNF57      | 1 |
| ZNF570     | 1 |
| ZNF589     | 1 |
| ZNF597     | 1 |
| ZNF608     | 1 |
| ZNF610     | 1 |
| ZNF646     | 1 |
| ZNF648     | 1 |
| ZNF674-AS1 | 1 |
| ZNF697     | 1 |
| ZNF7       | 1 |
| ZNF70      | 1 |
| ZNF710     | 1 |
| ZNF716     | 1 |
| ZNF720     | 1 |
| ZNF727     | 1 |
| ZNF733P    | 1 |
| ZNF761     | 1 |
| ZNF770     | 1 |
| ZNF775     | 1 |
| ZNF777     | 1 |
| ZNF800     | 1 |
| ZNF808     | 1 |
| ZNF813     | 1 |
| ZNF823     | 1 |
| ZNF841     | 1 |
| ZNF845     | 1 |
| ZNF853     | 1 |
| ZNF862     | 1 |
| ZNF883     | 1 |

|         |   |
|---------|---|
| ZRANB3  | 1 |
| ZSCAN1  | 1 |
| ZSCAN12 | 1 |
| ZSCAN29 | 1 |
| ZSWIM5  | 1 |
| ZSWIM6  | 1 |
